# Supplementary material for: Multi-omics data integration towards sustainable bovine production, health and welfare: the case of painful foot lesions
Source: Research Square preprint supplement (doi:10.21203/rs.3.rs-6000979/v1), 2025-03-26
Supplement: Supplementary file 1 [file 3af9ab7d197dbbbb2f1656d0.docx]

**Supplementary methods**

**Calculation of CHDL score**

CHDL score was based on SH, SU and WLD scores combined into one single CHDL phenotype. CHDL score for individual animals was calculated as follows:

(1). Re-scaling SU score to account for the fact that SU develops from evolved severe SH cases. In the re-scaling, SU score of 0, 1, 2, or 3 were re-scaled to 0, 4, 5, or 6, respectively.

(2) Combining SH (0/1/2/3) and SU (0/4/5/6) scores to derive a Sole-lesion score for each claw: If the SU score was not 0, the Sole-lesion score was set equal to the SU score; If SU score was equal to 0, the Sole-lesion score was set equal to the SH score.

(3) Calculating the average of Sole-lesion score across all measured claws of each animal (i.e., mean-Sole-lesion)

(4) Calculating the average of WLD score across all measured claws of each animal (i.e., mean-WLD)

(5) The CHDL score of each animal is the sum of its mean-Sole-lesion (from Step 3) and mean-WLD (from Step 4)

Each animal had four repeated measurements of CHDL score across time which were averaged to obtain the final CHDL score for each animal.

**Blood sample collection and peripheral blood lymphocytes isolation**

Blood samples for isolation of bovine peripheral blood lymphocytes (PBLs) were collected from the jugular vein of the 24 cattle selected into 6 of 10ml VECUETTE® EDTA tubes (Greiner Bio-one, Kremsmünster, Austria). PBLs were isolated by erythrocyte lysis [79], briefly, 4ml of anti-coagulated blood was added to 40ml ammonium chloride lysing solution (8.29g NH4Cl, 1g KHCO3 and 37mg Na2EDTA in 1L distilled water, pH7.2), and incubated at room temperature for 10min. PBLs were harvested by centrifugation and washed three times with 40ml of phosphate buffered saline (PBS) with 1% bovine serum albumin solution. PBLs were counted by trypan blue dye exclusion revealing >90% cell viability. Isolated PBLs were resuspended in 350µL BufferRLT from the RNeasy Mini kit (Qiagen, Hilden, Germany) at 106cells/mL and stored at -80°C. Concurrently, 106cells/mL of isolated PBL were resuspended in 200µL PBS. Then, 40µL Proteinase K from the DNeasy Blood & Tissue Kits (Qiagen, Hilden, Germany) and 20µL of RNase A (20 mg/mL; PureLink™, InvitrogenTM, Massachusetts, United States) were added, and incubated at room temperature for 2 minutes. 300µL of BufferAL from the DNeasy Blood & Tissue Kits was added and incubated at 56°C for 2 hours followed by 70°C for 15 minutes. The resulting lysate was stored at -80°C.

**Foot tissue biopsy collection**

Biopsy specimens of foot tissue were obtained from 14 of the selected cows. For case animals, biopsies were performed on the foot bearing the lesion. The foot chosen for control animals was selected to reflect the matched case, or if a minor lesion was present, the opposite hind claw was chosen. Before biopsy specimen collection, the foot was washed with water to remove manure/debris. An initial scrub with Chlorhexidine was performed, followed by the application of local anaesthesia using 20ml Adrenacaine (Norbrook lnc. Newry, Northern Ireland). The anaesthetic was allowed to take effect and the presence of anaesthesia tested, followed by a final scrub with surgical spirit and gauze. A tourniquet was placed around the proximal metatarsus, and a ~7mm hole was drilled in the horn at the dorsal hoof wall with 1mm of horn left behind at the biopsy site using a drill and dremmel. A 6-mm biopsy punch with a maximum coring depth of 6mm (Integra Miltex; Integra life Science Corporation, York, PA, USA) was used to biopsy the remaining horn layer and part of the corium, and the sample was carefully removed with a scalpel blade and dressing forceps. The sample was placed in a labelled cryovial, adding 1ml Allprotect tissue reagent (Qiagen, Hilden, Germany). The biopsies in Allprotect were stored at 4oC overnight and then 20oC. After biopsy sampling, lavage with saline was performed at the biopsy site followed by application of topical antibiotic spray and bandage. Finally, 20mls of Ketofen (Zoetis Canada lnc., Kirkland, Quebec, Canada) was administered via Intramuscular injection in the neck.

**RT-qPCR**

For RT-qPCR validation of differential expression results a more stringent LFC threshold was applied ≥1.5 and a base mean threshold of >25 leaving 15 candidate genes for validation in foot tissue RNA samples, 14 of which could be successfully validated by RT-qPCR and 10 candidate genes for validation in PBL RNA.

RT-qPCR was performed, in duplicate, for all 24 PBL and 14 foot tissue RNA samples. Reverse transcription was performed in a 20µL reaction using 300ng of extracted RNA using LunaScript RT SuperMix (5X) following the manufacturer’s instructions including thermocycler conditions, a single cycle of each: annealing 25oC 2 minutes, cDNA synthesis 55oC 10 minutes and heat inactivation 95oC 1 minute. cDNA was stored at -20oC and used for qPCR analysis. Primers for qPCR analysis were designed using ThermoFisher Oligo perfect and produced using Invitrogen custom primers. Primer sequences are provided in Supplementary Table S16. The qPCR 20µL reaction mix was made according to the Luna Universal qPCR mastermix manufacturer specifications. Thermocycler conditions were adapted from manufacturer specifications: initial denaturation - 95oC 60 seconds, denaturation - 95oC 15 seconds, annealing (and data acquisition) – 60oC 30 seconds, extension – 72oC 15 seconds, additional data acquisition – 85oC, 5 seconds, melt curve – 60-95oC. Denaturation to additional data acquisition cycles x40. A CHDL case vs control statistical analysis of Cq values was performed, first a shapiro-wilks normality test then a T-test for each gene investigated.
