# Supplementary material for: Multi-omics data integration towards sustainable bovine production, health and welfare: the case of painful foot lesions
Source: Research Square preprint supplement (doi:10.21203/rs.3.rs-6000979/v1), 2025-03-26
Supplement: Supplementary file 2 [file bf5b0cf1db95c58a68f00728.docx]

**Supplementary Results**

Table S1: Meta data for the 24 phenotypically extreme cows including ID, age (in years) their classification as wither CHDL case or control based on CHDL scoring, whether a foot biopsy sample was taken and the average CHDL score (calculated based on the CHDL score given at each of the four lactation stages over the study period, detailed in methods).

| Cow ID | Age (years) | CHDL case/control | Foot biopsy taken | Averages CHDL core |
| --- | --- | --- | --- | --- |
| 2546 | 4 | Case | Yes | 0.625 |
| 2344 | 5 | Control | Yes | 0.188 |
| 2603 | 4 | Case | Yes | 0.469 |
| 897 | 7 | Case | Yes | 0.688 |
| 2633 | 5 | Control | NO | 0.042 |
| 2685 | 5 | Control | NO | 0.063 |
| 2338 | 5 | Case | Yes | 0.938 |
| 2330 | 5 | Control | NO | 0.156 |
| 2345 | 5 | Control | Yes | 0.063 |
| 2353 | 5 | Control | Yes | 0.188 |
| 2179 | 7 | Control | NO | 0.031 |
| 2911 | 4 | Control | NO | 0.083 |
| 2381 | 5 | Case | Yes | 0.813 |
| 2402 | 5 | Control | Yes | 0.219 |
| 2606 | 4 | Case | NO | 0.375 |
| 2319 | 5 | Control | Yes | 0.125 |
| 2152 | 6 | Case | Yes | 0.708 |
| 2628 | 4 | Control | Yes | 0.156 |
| 2391 | 5 | Case | Yes | 0.458 |
| 3013 | 4 | Case | NO | 0.688 |
| 2376 | 6 | Case | NO | 0.531 |
| 2829 | 5 | Case | NO | 0.417 |
| 2812 | 5 | Case | NO | 0.417 |
| 2524 | 4 | Control | Yes | 0.156 |

*Table S2: The top ten markers (by lowest p value) associated with CHDL as a combined trait detailing genomic position, lambda corrected p-value and the nearest gene to the genomic location*.

| Chromosome | Position | p_value | Nearest gene ID | Nearest gene name |
| --- | --- | --- | --- | --- |
| 5 | 87262266 | 1.39E-05 | ENSBTAG00000005833 | ETNK1 |
| 1 | 147338727 | 2.53E-05 | ENSBTAG00000004742 | RUNX1 |
| 15 | 5234380 | 2.74E-05 | ENSBTAG00000019309 | DYNC2H1 |
| 1 | 147241898 | 3.44E-05 | ENSBTAG00000004742 | RUNX1 |
| 3 | 30167683 | 3.79E-05 | ENSBTAG00000027172 | Novel cattle gene |
| 14 | 78522424 | 4.47E-05 | ENSBTAG00000046821 | Novel cattle gene |
| 5 | 88079689 | 5.21E-05 | ENSBTAG00000026611 | Novel cattle gene |
| 3 | 88991871 | 5.70E-05 | ENSBTAG00000013802 | DAB1 |
| 10 | 61837266 | 7.41E-05 | ENSBTAG00000002278 | FBN1 |
| 23 | 43909068 | 9.08E-05 | ENSBTAG00000012039 | PHACTR1 |

*Table S3: The top 10 genomic windows explaining the most genetic variance. Genomic window name indicates the genomic position (chromosome: start bp – end bp).*

| Genomic window | % genetic variance explained |
| --- | --- |
| BTA3:88750416-88750416bp | 0.54 |
| BTA3:88770660-88770660bp | 0.54 |
| BTA3:88796395-88796395bp | 0.49 |
| BTA10:80785147-80785147bp | 0.48 |
| BTA3:88821997-88821997bp | 0.47 |
| BTA10:80790117-80790117bp | 0.47 |
| BTA10:80740519-80740519bp | 0.47 |
| BTA10:80762670-80762670bp | 0.47 |
| BTA10:80818350-80818350bp | 0.46 |
| BTA10:80799562-80799562bp | 0.45 |

*Table S4: Chi square results of the distribution of SNPs in the top 100 GWAS windows* *identified by WGS. Results of the Chi square comparisons (p≤0.10) of the frequency of SNP variants between case and control in the top 100 GWAS windows. Table shows the SNP position and associated gene, the Chi-squared statistic, degrees of freedom and p value for each SNP along with the assigned consequence and impact by VEP.*

| Gene name | SNP | X2 | df | P value | Consequence | IMPACT |
| --- | --- | --- | --- | --- | --- | --- |
| *ACTR3B* | BovChr4Pos115184022 | 9.17 | 3 | 0.027 | 3_prime_UTR_variant | MODIFIER |
| *ACTR3B* | BovChr4Pos115184077 | 9.17 | 3 | 0.027 | 3_prime_UTR_variant | MODIFIER |
| *XRCC2* | BovChr4Pos115031057 | 8.77 | 3 | 0.033 | missense_variant | MODERATE |
| *ACTR3B* | BovChr4Pos115181797 | 8.25 | 3 | 0.041 | synonymous_variant | LOW |
| *XRCC2* | BovChr4Pos115031007 | 7.88 | 3 | 0.049 | missense_variant | MODERATE |
| *SLC29A3* | BovChr28Pos27453921 | 7.47 | 3 | 0.058 | 5_prime_UTR_variant | MODIFIER |
| *MX2* | BovChr1Pos141656323 | 5.57 | 2 | 0.062 | synonymous_variant | LOW |
| *MX2* | BovChr1Pos141656417 | 5.57 | 2 | 0.062 | 3_prime_UTR_variant | MODIFIER |
| *MX2* | BovChr1Pos141656685 | 5.57 | 2 | 0.062 | 3_prime_UTR_variant | MODIFIER |
| *MX2* | BovChr1Pos141656957 | 5.57 | 2 | 0.062 | 3_prime_UTR_variant | MODIFIER |
| *MX2* | BovChr1Pos141657878 | 5.57 | 2 | 0.062 | 3_prime_UTR_variant | MODIFIER |
| *MX2* | BovChr1Pos141658152 | 5.57 | 2 | 0.062 | 3_prime_UTR_variant | MODIFIER |
| *MX2* | BovChr1Pos141658169 | 5.57 | 2 | 0.062 | 3_prime_UTR_variant | MODIFIER |
| *MX2* | BovChr1Pos141658170 | 5.57 | 2 | 0.062 | 3_prime_UTR_variant | MODIFIER |
| *PRKAA2* | BovChr3Pos89549747 | 7.24 | 3 | 0.065 | upstream_gene_variant | MODIFIER |
| *LRP8* | BovChr3Pos92976498 | 5.47 | 2 | 0.065 | synonymous_variant | LOW |
| *H3-3B* | BovChr19Pos55821471 | 7.01 | 3 | 0.071 | 5_prime_UTR_variant | MODIFIER |
| *FYB2* | BovChr3Pos89409465 | 6.57 | 3 | 0.087 | synonymous_variant | LOW |
| *CCDC177* | BovChr10Pos81312514 | 6.55 | 3 | 0.088 | synonymous_variant | LOW |
| *EVPL* | BovChr19Pos55642058 | 4.85 | 2 | 0.089 | synonymous_variant | LOW |
| *EVPL* | BovChr19Pos55643109 | 4.85 | 2 | 0.089 | synonymous_variant | LOW |
| *EVPL* | BovChr19Pos55643198 | 4.85 | 2 | 0.089 | missense_variant | MODERATE |
| *EVPL* | BovChr19Pos55643415 | 4.85 | 2 | 0.089 | synonymous_variant | LOW |
| *EVPL* | BovChr19Pos55643499 | 4.85 | 2 | 0.089 | synonymous_variant | LOW |
| *EVPL* | BovChr19Pos55643604 | 4.85 | 2 | 0.089 | synonymous_variant | LOW |
| *EVPL* | BovChr19Pos55643616 | 4.85 | 2 | 0.089 | synonymous_variant | LOW |
| *CDK3* | BovChr19Pos55645229 | 4.85 | 2 | 0.089 | 3_prime_UTR_variant | MODIFIER |
| *RECQL5* | BovChr19Pos55943421 | 4.85 | 2 | 0.089 | splice_acceptor_variant | HIGH |
| *RECQL5* | BovChr19Pos55943422 | 4.85 | 2 | 0.089 | splice_acceptor_variant | HIGH |
| *ACTR3B* | BovChr4Pos115133532 | 6.46 | 3 | 0.091 | 5_prime_UTR_variant | MODIFIER |
| *SUSD6* | BovChr10Pos81361127 | 4.61 | 2 | 0.100 | 5_prime_UTR_variant | MODIFIER |

Table S5: Differentially expressed genes between CHDL case and Control samples of bovine peripheral blood lymphocytes of dairy cows. Genes were considered for Gene Set Enrichment Analysis if they had a log2 fold change greater than or equal to 1 or less than or equal to -1, an unadjusted p-value of 0.05 or lower and baseMean greater than or equal to 100.

| Gene ID | Gene name | Type | Strand | Gene biotype | baseMean | log2fc | Raw *P* - value | FDR |
| --- | --- | --- | --- | --- | --- | --- | --- | --- |
| ENSBTAG00000053198 | ensembl | exon | - | protein_coding | 781.38 | 8.23 | 5.11E-06 | 0.00996 |
| ENSBTAG00000011182 | PDLIM1 | exon | - | protein_coding | 303.86 | 2.14 | 2.01E-05 | 0.03321 |
| ENSBTAG00000019349 | SLC6A4 | exon | - | protein_coding | 128.26 | 1.75 | 4.53E-05 | 0.06935 |
| ENSBTAG00000034185 | ensembl | exon | + | protein_coding | 1875.61 | 4.46 | 0.00010 | 0.13167 |
| ENSBTAG00000019839 | LTBP1 | exon | + | protein_coding | 429.75 | 2.72 | 0.00017 | 0.16760 |
| ENSBTAG00000015434 | DSTN | exon | + | protein_coding | 168.94 | 1.95 | 0.00021 | 0.18799 |
| ENSBTAG00000017349 | PCDHGC3 | exon | + | protein_coding | 234.58 | 1.73 | 0.00031 | 0.23990 |
| ENSBTAG00000000231 | BMPR1A | exon | + | protein_coding | 151.63 | 1.52 | 0.00897 | 0.39695 |
| ENSBTAG00000001083 | MAP3K20 | exon | - | protein_coding | 723.73 | 1.09 | 0.00514 | 0.39695 |
| ENSBTAG00000001125 | ADAMDEC1 | exon | + | protein_coding | 699.61 | -1.60 | 0.01072 | 0.39695 |
| ENSBTAG00000002278 | FBN1 | exon | + | protein_coding | 384.08 | 2.94 | 0.00092 | 0.39695 |
| ENSBTAG00000002908 | GNG4 | exon | - | protein_coding | 280.94 | 1.34 | 0.01907 | 0.39695 |
| ENSBTAG00000003668 | RADX | exon | + | protein_coding | 609.38 | 1.13 | 0.01116 | 0.39695 |
| ENSBTAG00000004283 | PPFIBP1 | exon | - | protein_coding | 123.70 | 1.28 | 0.01720 | 0.39695 |
| ENSBTAG00000005146 | ensembl | exon | - | protein_coding | 609.13 | -1.34 | 0.00313 | 0.39695 |
| ENSBTAG00000005668 | SLC39A8 | exon | + | protein_coding | 142.57 | 1.64 | 0.00588 | 0.39695 |
| ENSBTAG00000006035 | PPP1R1B | exon | + | protein_coding | 188.45 | 1.61 | 0.00560 | 0.39695 |
| ENSBTAG00000006828 | RAPGEF3 | exon | + | protein_coding | 160.66 | 1.02 | 0.02208 | 0.39695 |
| ENSBTAG00000007434 | CD300LG | exon | + | protein_coding | 385.49 | 1.30 | 0.01723 | 0.39695 |
| ENSBTAG00000007763 | SLC1A4 | exon | + | protein_coding | 1022.99 | 1.13 | 0.01091 | 0.39695 |
| ENSBTAG00000008817 | LAMA4 | exon | + | protein_coding | 178.82 | 1.36 | 0.01236 | 0.39695 |
| ENSBTAG00000009902 | AKR1B1 | exon | - | protein_coding | 167.29 | 1.04 | 0.01203 | 0.39695 |
| ENSBTAG00000009959 | SLC6A8 | exon | + | protein_coding | 136.37 | 1.61 | 0.00470 | 0.39695 |
| ENSBTAG00000010431 | LURAP1L | exon | - | protein_coding | 185.92 | 1.48 | 0.01192 | 0.39695 |
| ENSBTAG00000010526 | PLPP1 | exon | + | protein_coding | 141.09 | 1.22 | 0.01682 | 0.39695 |
| ENSBTAG00000010682 | DDR1 | exon | - | protein_coding | 106.98 | 2.76 | 0.00083 | 0.39695 |
| ENSBTAG00000011961 | ensembl | exon | + | protein_coding | 822.19 | 1.29 | 0.00179 | 0.39695 |
| ENSBTAG00000011961 | ensembl | exon | + | protein_coding | 822.19 | 1.29 | 0.00179 | 0.39695 |
| ENSBTAG00000011966 | LAMC1 | exon | + | protein_coding | 354.33 | 1.12 | 0.00657 | 0.39695 |
| ENSBTAG00000012265 | VWF | exon | + | protein_coding | 135.45 | 2.03 | 0.00331 | 0.39695 |
| ENSBTAG00000012342 | LIMA1 | exon | + | protein_coding | 137.39 | 1.30 | 0.00810 | 0.39695 |
| ENSBTAG00000013187 | DLG5 | exon | - | protein_coding | 130.49 | 1.73 | 0.02459 | 0.39695 |
| ENSBTAG00000013281 | SPATA21 | exon | + | protein_coding | 102.70 | -2.47 | 0.01266 | 0.39695 |
| ENSBTAG00000013755 | ITGB5 | exon | - | protein_coding | 203.29 | 1.45 | 0.01091 | 0.39695 |
| ENSBTAG00000013953 | CALD1 | exon | + | protein_coding | 139.51 | 1.29 | 0.00416 | 0.39695 |
| ENSBTAG00000014614 | ACTA2 | exon | - | protein_coding | 286.30 | 1.49 | 0.00251 | 0.39695 |
| ENSBTAG00000014824 | MMP14 | exon | - | protein_coding | 129.67 | 2.39 | 0.00192 | 0.39695 |
| ENSBTAG00000014991 | PARD3 | exon | + | protein_coding | 137.29 | 2.09 | 0.00741 | 0.39695 |
| ENSBTAG00000015692 | HSPA4L | exon | - | protein_coding | 401.12 | 1.59 | 0.00661 | 0.39695 |
| ENSBTAG00000016469 | TNKS1BP1 | exon | - | protein_coding | 119.10 | 1.60 | 0.01795 | 0.39695 |
| ENSBTAG00000016525 | ITGA1 | exon | - | protein_coding | 527.84 | 1.25 | 0.00404 | 0.39695 |
| ENSBTAG00000017132 | TTC22 | exon | + | protein_coding | 137.03 | 1.16 | 0.02004 | 0.39695 |
| ENSBTAG00000017425 | GJB2 | exon | + | protein_coding | 112.91 | 1.75 | 0.00652 | 0.39695 |
| ENSBTAG00000017486 | ADARB1 | exon | + | protein_coding | 109.02 | 1.38 | 0.01506 | 0.39695 |
| ENSBTAG00000017574 | LMNA | exon | - | protein_coding | 344.87 | 1.85 | 0.00092 | 0.39695 |
| ENSBTAG00000018130 | MAP2 | exon | + | protein_coding | 542.97 | 1.74 | 0.00089 | 0.39695 |
| ENSBTAG00000018785 | TUBB1 | exon | - | protein_coding | 2214.72 | 1.12 | 0.00832 | 0.39695 |
| ENSBTAG00000018909 | CREB5 | exon | - | protein_coding | 376.26 | 1.20 | 0.01737 | 0.39695 |
| ENSBTAG00000019227 | ensembl | exon | - | protein_coding | 789.63 | -1.47 | 0.00287 | 0.39695 |
| ENSBTAG00000020569 | CACNA2D1 | exon | + | protein_coding | 118.28 | 1.34 | 0.01659 | 0.39695 |
| ENSBTAG00000020638 | TIMP3 | exon | + | protein_coding | 345.53 | 1.41 | 0.00438 | 0.39695 |
| ENSBTAG00000020696 | HECW2 | exon | - | protein_coding | 154.66 | 1.11 | 0.02443 | 0.39695 |
| ENSBTAG00000020755 | SELP | exon | - | protein_coding | 105.58 | 1.28 | 0.00262 | 0.39695 |
| ENSBTAG00000023907 | COL18A1 | exon | + | protein_coding | 564.38 | 1.34 | 0.01767 | 0.39695 |
| ENSBTAG00000030190 | COL6A3 | exon | - | protein_coding | 186.42 | 1.85 | 0.01994 | 0.39695 |
| ENSBTAG00000031707 | FRMD6 | exon | + | protein_coding | 384.05 | 1.35 | 0.00469 | 0.39695 |
| ENSBTAG00000032518 | SPRED1 | exon | + | protein_coding | 215.89 | 1.13 | 0.00417 | 0.39695 |
| ENSBTAG00000032657 | TEAD1 | exon | - | protein_coding | 101.31 | 1.65 | 0.00574 | 0.39695 |
| ENSBTAG00000037644 | HBB | exon | + | protein_coding | 251.26 | 1.45 | 0.00172 | 0.39695 |
| ENSBTAG00000040103 | SYT8 | exon | - | protein_coding | 182.20 | 2.15 | 0.00110 | 0.39695 |
| ENSBTAG00000047330 | FABP5 | exon | + | protein_coding | 181.43 | 2.20 | 0.00338 | 0.39695 |
| ENSBTAG00000048432 | BTBD3 | exon | + | protein_coding | 173.22 | 1.34 | 0.01410 | 0.39695 |
| ENSBTAG00000049497 | ensembl | exon | - | protein_coding | 238.03 | 1.33 | 0.02233 | 0.39695 |
| ENSBTAG00000050561 | ensembl | exon | + | protein_coding | 113.66 | 2.11 | 0.01715 | 0.39695 |
| ENSBTAG00000051086 | ensembl | exon | - | protein_coding | 217.78 | 2.07 | 0.00429 | 0.39695 |
| ENSBTAG00000051208 | ensembl | exon | + | protein_coding | 1293.13 | 1.07 | 0.01840 | 0.39695 |
| ENSBTAG00000051295 | FXYD4 | exon | + | protein_coding | 261.50 | 1.21 | 0.01280 | 0.39695 |
| ENSBTAG00000051474 | ensembl | exon | + | protein_coding | 230.35 | 1.09 | 0.01717 | 0.39695 |
| ENSBTAG00000053621 | H2AC17 | exon | + | protein_coding | 285.93 | -1.58 | 0.00831 | 0.39695 |
| ENSBTAG00000054063 | CD1A | exon | - | protein_coding | 219.78 | 1.20 | 0.01632 | 0.39695 |
| ENSBTAG00000054533 | GNG12 | exon | + | protein_coding | 322.43 | 1.33 | 0.00671 | 0.39695 |
| ENSBTAG00000055168 | ensembl | exon | + | protein_coding | 203.93 | 1.10 | 0.02518 | 0.39695 |
| ENSBTAG00000027126 | MUC15 | exon | - | protein_coding | 101.17 | 1.28 | 0.02729 | 0.39797 |
| ENSBTAG00000000182 | SPINT2 | exon | + | protein_coding | 189.65 | 1.02 | 0.02801 | 0.39822 |
| ENSBTAG00000003626 | MYO3B | exon | - | protein_coding | 113.72 | 1.07 | 0.02810 | 0.39822 |
| ENSBTAG00000023730 | TUBB3 | exon | + | protein_coding | 111.68 | 1.14 | 0.02835 | 0.39822 |
| ENSBTAG00000053134 | ensembl | exon | - | protein_coding | 626.86 | 1.15 | 0.02777 | 0.39822 |
| ENSBTAG00000000369 | EPS8 | exon | + | protein_coding | 221.84 | 1.01 | 0.03106 | 0.39858 |
| ENSBTAG00000012194 | DENND2C | exon | + | protein_coding | 103.66 | 1.21 | 0.03071 | 0.39858 |
| ENSBTAG00000017666 | ABCC5 | exon | + | protein_coding | 211.27 | 1.02 | 0.03092 | 0.39858 |
| ENSBTAG00000019018 | ensembl | exon | - | protein_coding | 2036.21 | 2.24 | 0.03153 | 0.39858 |
| ENSBTAG00000054833 | ensembl | exon | + | protein_coding | 227.02 | 1.21 | 0.03160 | 0.39858 |
| ENSBTAG00000051084 | ensembl | exon | - | protein_coding | 473.81 | -1.58 | 0.03391 | 0.40319 |
| ENSBTAG00000004948 | LRATD1 | exon | - | protein_coding | 375.14 | 1.40 | 0.03454 | 0.40387 |
| ENSBTAG00000039523 | ensembl | exon | - | protein_coding | 289.43 | 1.21 | 0.03420 | 0.40387 |
| ENSBTAG00000049313 | ensembl | exon | - | protein_coding | 117.20 | 1.28 | 0.03444 | 0.40387 |
| ENSBTAG00000050965 | ensembl | exon | + | protein_coding | 1321.60 | 1.01 | 0.03434 | 0.40387 |
| ENSBTAG00000055032 | ensembl | exon | + | protein_coding | 112.08 | -1.84 | 0.03434 | 0.40387 |
| ENSBTAG00000018705 | ADCY3 | exon | + | protein_coding | 202.46 | 1.09 | 0.03669 | 0.41029 |
| ENSBTAG00000050753 | ensembl | exon | - | protein_coding | 282.71 | 1.14 | 0.03700 | 0.41029 |
| ENSBTAG00000014761 | PGA5 | exon | + | protein_coding | 307.16 | -1.09 | 0.03850 | 0.41309 |
| ENSBTAG00000052305 | ensembl | exon | - | protein_coding | 2475.16 | 1.25 | 0.04150 | 0.42384 |
| ENSBTAG00000004328 | CHST10 | exon | - | protein_coding | 309.81 | 1.25 | 0.04183 | 0.42584 |
| ENSBTAG00000039684 | CAVIN1 | exon | - | protein_coding | 212.08 | 1.27 | 0.04208 | 0.42609 |
| ENSBTAG00000052050 | ensembl | exon | + | protein_coding | 1031.89 | 1.46 | 0.04441 | 0.43343 |
| ENSBTAG00000000841 | LZTS1 | exon | - | protein_coding | 248.63 | 1.33 | 0.04558 | 0.43697 |
| ENSBTAG00000005370 | TMTC1 | exon | + | protein_coding | 100.54 | 1.25 | 0.04546 | 0.43697 |
| ENSBTAG00000052603 | ensembl | exon | - | protein_coding | 206.58 | 1.09 | 0.04588 | 0.43717 |
| ENSBTAG00000019958 | NXNL2 | exon | - | protein_coding | 739.74 | 1.00 | 0.04675 | 0.43723 |
| ENSBTAG00000006726 | CCDC102B | exon | - | protein_coding | 119.87 | 1.05 | 0.04782 | 0.43846 |
| ENSBTAG00000049832 | ensembl | exon | - | protein_coding | 279.17 | 1.27 | 0.04869 | 0.44085 |
| ENSBTAG00000051848 | ensembl | exon | - | protein_coding | 101.30 | 1.02 | 0.04869 | 0.44085 |
| ENSBTAG00000051935 | ensembl | exon | + | protein_coding | 205.17 | 1.07 | 0.04978 | 0.44518 |
| ENSBTAG00000004895 | AFAP1L2 | exon | - | protein_coding | 238.69 | 1.21 | 0.04995 | 0.44579 |

Table S6: Gene Set Enrichment Analysis (GSEA) table presents the significant biological processes (BP), Cellular Component (CC) and Molecular Function (MF) enriched among the differentially expressed genes (DEGs; LFC ³ 1, baseMean ³ 100 and unadjusted p-value £ 0.05) in CHDL Case samples compared to Control samples of bovine peripheral blood lymphocytes. Columns include the Ontology and Gene Ontology ID, Ontology description, the number of genes in the set (setSize), the normalized enrichment score (NES), and the FDR p-value, gene set name. Positive NES values represent enrichment in upregulated genes, while negative NES values indicate enrichment in downregulated genes.

| ONTOLOGY | ID | Description | setSize | NES | FDR | Gene set enriched |
| --- | --- | --- | --- | --- | --- | --- |
| BP | GO:0006807 | nitrogen compound metabolic process | 3 | 1.85 | 0.001 | ENSBTAG00000014824/ENSBTAG00000047330/ENSBTAG00000011182 |
| BP | GO:0048522 | positive regulation of cellular process | 6 | 1.87 | 0.005 | ENSBTAG00000014824/ENSBTAG00000047330/ENSBTAG00000011182/ENSBTAG00000015434/ENSBTAG00000019349 |
| BP | GO:0050794 | regulation of cellular process | 9 | 1.80 | 0.009 | ENSBTAG00000002278/ENSBTAG00000014824/ENSBTAG00000047330/ENSBTAG00000011182/ENSBTAG00000015434/ENSBTAG00000019349 |
| BP | GO:0048519 | negative regulation of biological process | 3 | 1.68 | 0.013 | ENSBTAG00000014824/ENSBTAG00000047330/ENSBTAG00000019349 |
| BP | GO:0051239 | regulation of multicellular organismal process | 3 | 1.68 | 0.013 | ENSBTAG00000014824/ENSBTAG00000047330/ENSBTAG00000019349 |
| BP | GO:0065007 | biological regulation | 13 | 1.80 | 0.014 | ENSBTAG00000002278/ENSBTAG00000014824/ENSBTAG00000047330/ENSBTAG00000011182/ENSBTAG00000012265/ENSBTAG00000015434/ENSBTAG00000019349/ENSBTAG00000006035/ENSBTAG00000014614 |
| BP | GO:0044238 | primary metabolic process | 4 | 1.74 | 0.014 | ENSBTAG00000014824/ENSBTAG00000047330/ENSBTAG00000011182 |
| BP | GO:0048518 | positive regulation of biological process | 7 | 1.72 | 0.019 | ENSBTAG00000014824/ENSBTAG00000047330/ENSBTAG00000011182/ENSBTAG00000015434/ENSBTAG00000019349/ENSBTAG00000014614 |
| BP | GO:0009987 | cellular process | 17 | 1.78 | 0.021 | ENSBTAG00000002278/ENSBTAG00000014824/ENSBTAG00000047330/ENSBTAG00000011182/ENSBTAG00000012265/ENSBTAG00000015434/ENSBTAG00000017425/ENSBTAG00000019349/ENSBTAG00000009959/ENSBTAG00000014614/ENSBTAG00000037644/ENSBTAG00000004948 |
| BP | GO:0008150 | biological_process | 20 | 1.69 | 0.022 | ENSBTAG00000002278/ENSBTAG00000014824/ENSBTAG00000047330/ENSBTAG00000011182/ENSBTAG00000012265/ENSBTAG00000015434/ENSBTAG00000017425/ENSBTAG00000019349/ENSBTAG00000009959/ENSBTAG00000006035/ENSBTAG00000014614/ENSBTAG00000037644/ENSBTAG00000004948 |
| BP | GO:0050789 | regulation of biological process | 10 | 1.69 | 0.023 | ENSBTAG00000002278/ENSBTAG00000014824/ENSBTAG00000047330/ENSBTAG00000011182/ENSBTAG00000015434/ENSBTAG00000019349 |
| BP | GO:0009893 | positive regulation of metabolic process | 4 | 1.65 | 0.031 | ENSBTAG00000047330/ENSBTAG00000011182/ENSBTAG00000019349/ENSBTAG00000014614 |
| BP | GO:0010467 | gene expression | 4 | 1.65 | 0.031 | ENSBTAG00000014824/ENSBTAG00000011182/ENSBTAG00000019349/ENSBTAG00000014614 |
| BP | GO:0019222 | regulation of metabolic process | 4 | 1.65 | 0.031 | ENSBTAG00000047330/ENSBTAG00000011182/ENSBTAG00000019349/ENSBTAG00000014614 |
| BP | GO:0043170 | macromolecule metabolic process | 4 | 1.65 | 0.031 | ENSBTAG00000014824/ENSBTAG00000011182/ENSBTAG00000019349/ENSBTAG00000014614 |
| BP | GO:0008152 | metabolic process | 6 | 1.65 | 0.031 | ENSBTAG00000014824/ENSBTAG00000047330/ENSBTAG00000011182/ENSBTAG00000019349/ENSBTAG00000014614 |
| BP | GO:0071704 | organic substance metabolic process | 6 | 1.65 | 0.031 | ENSBTAG00000014824/ENSBTAG00000047330/ENSBTAG00000011182/ENSBTAG00000019349/ENSBTAG00000014614 |
| BP | GO:0065008 | regulation of biological quality | 6 | 1.64 | 0.034 | ENSBTAG00000047330/ENSBTAG00000012265/ENSBTAG00000015434/ENSBTAG00000019349/ENSBTAG00000014614 |
| BP | GO:0007165 | signal transduction | 5 | 1.65 | 0.037 | ENSBTAG00000002278/ENSBTAG00000014824/ENSBTAG00000047330 |
| BP | GO:0050896 | response to stimulus | 9 | 1.62 | 0.037 | ENSBTAG00000002278/ENSBTAG00000014824/ENSBTAG00000047330/ENSBTAG00000012265/ENSBTAG00000019349/ENSBTAG00000014614/ENSBTAG00000037644 |
| BP | GO:0007154 | cell communication | 6 | 1.62 | 0.041 | ENSBTAG00000002278/ENSBTAG00000014824/ENSBTAG00000047330/ENSBTAG00000017425 |
| BP | GO:0023052 | signaling | 6 | 1.62 | 0.041 | ENSBTAG00000002278/ENSBTAG00000014824/ENSBTAG00000047330/ENSBTAG00000017425 |
| CC | GO:0030312 | external encapsulating structure | 3 | 1.77 | 0.004 | ENSBTAG00000002278/ENSBTAG00000014824/ENSBTAG00000012265 |
| CC | GO:0031012 | extracellular matrix | 3 | 1.77 | 0.004 | ENSBTAG00000002278/ENSBTAG00000014824/ENSBTAG00000012265 |
| CC | GO:0030054 | cell junction | 3 | 1.68 | 0.013 | ENSBTAG00000047330/ENSBTAG00000017425/ENSBTAG00000019349 |
| CC | GO:0070161 | anchoring junction | 3 | 1.68 | 0.013 | ENSBTAG00000047330/ENSBTAG00000017425/ENSBTAG00000019349 |
| CC | GO:0005575 | cellular_component | 20 | 1.65 | 0.040 | ENSBTAG00000002278/ENSBTAG00000014824/ENSBTAG00000047330/ENSBTAG00000011182/ENSBTAG00000012265/ENSBTAG00000015434/ENSBTAG00000017425/ENSBTAG00000019349/ENSBTAG00000006035/ENSBTAG00000014614/ENSBTAG00000013755/ENSBTAG00000004948/ENSBTAG00000054533/ENSBTAG00000007434/ENSBTAG00000013953/ENSBTAG00000020755/ENSBTAG00000027126 |
| CC | GO:0110165 | cellular anatomical entity | 20 | 1.65 | 0.040 | ENSBTAG00000002278/ENSBTAG00000014824/ENSBTAG00000047330/ENSBTAG00000011182/ENSBTAG00000012265/ENSBTAG00000015434/ENSBTAG00000017425/ENSBTAG00000019349/ENSBTAG00000006035/ENSBTAG00000014614/ENSBTAG00000013755/ENSBTAG00000004948/ENSBTAG00000054533/ENSBTAG00000007434/ENSBTAG00000013953/ENSBTAG00000020755/ENSBTAG00000027126 |
| CC | GO:0005737 | cytoplasm | 12 | 1.63 | 0.045 | ENSBTAG00000014824/ENSBTAG00000047330/ENSBTAG00000011182/ENSBTAG00000012265/ENSBTAG00000015434/ENSBTAG00000019349/ENSBTAG00000006035/ENSBTAG00000014614/ENSBTAG00000004948 |
| MF | GO:0042802 | identical protein binding | 4 | 1.87 | 0.003 | ENSBTAG00000047330/ENSBTAG00000012265/ENSBTAG00000017425/ENSBTAG00000019349 |
| MF | GO:0003674 | molecular_function | 21 | 1.82 | 0.012 | ENSBTAG00000002278/ENSBTAG00000014824/ENSBTAG00000047330/ENSBTAG00000011182/ENSBTAG00000012265/ENSBTAG00000015434/ENSBTAG00000017425/ENSBTAG00000019349/ENSBTAG00000009959/ENSBTAG00000006035/ENSBTAG00000014614/ENSBTAG00000013755/ENSBTAG00000037644/ENSBTAG00000020638 |
| MF | GO:0044877 | protein-containing complex binding | 3 | 1.68 | 0.013 | ENSBTAG00000012265/ENSBTAG00000015434/ENSBTAG00000019349 |
| MF | GO:0043167 | ion binding | 11 | 1.80 | 0.013 | ENSBTAG00000002278/ENSBTAG00000014824/ENSBTAG00000047330/ENSBTAG00000011182/ENSBTAG00000017425/ENSBTAG00000019349/ENSBTAG00000014614/ENSBTAG00000037644/ENSBTAG00000020638 |
| MF | GO:0005488 | binding | 15 | 1.78 | 0.017 | ENSBTAG00000002278/ENSBTAG00000014824/ENSBTAG00000047330/ENSBTAG00000011182/ENSBTAG00000012265/ENSBTAG00000015434/ENSBTAG00000017425/ENSBTAG00000019349/ENSBTAG00000014614/ENSBTAG00000037644/ENSBTAG00000020638 |
| MF | GO:0043169 | cation binding | 8 | 1.69 | 0.028 | ENSBTAG00000002278/ENSBTAG00000014824/ENSBTAG00000011182/ENSBTAG00000017425/ENSBTAG00000019349/ENSBTAG00000037644/ENSBTAG00000020638 |
| MF | GO:0046872 | metal ion binding | 8 | 1.69 | 0.028 | ENSBTAG00000002278/ENSBTAG00000014824/ENSBTAG00000011182/ENSBTAG00000017425/ENSBTAG00000019349/ENSBTAG00000037644/ENSBTAG00000020638 |
| MF | GO:0005515 | protein binding | 10 | 1.66 | 0.029 | ENSBTAG00000002278/ENSBTAG00000047330/ENSBTAG00000012265/ENSBTAG00000015434/ENSBTAG00000017425/ENSBTAG00000019349 |
| MF | GO:0005215 | transporter activity | 5 | 1.56 | 0.038 | ENSBTAG00000047330/ENSBTAG00000017425/ENSBTAG00000019349/ENSBTAG00000009959 |

*Table S7: Gene ontology enrichment summary by Revigo for differentially expressed genes identified in PBL samples. Columns include log(pvalue) of GO enrichment of term, LogSize (the Log10(number of annotations for GO Term ID in Bos Taurus in the EBI GOA database)), Frequency (the proportion of the GO term in the underlying Bos Taurus protein annotation database – higher frequency implies more general terms, lower frequency implies more specific terms), Uniqueness (a measure of whether the term is an outlier compared to the whole list – calculated by 1-(avg. semantic similarity of term to all other terms) – typically the more unique the term the less dispensable) and Dispensability (semantic similarity threshold at which the term was removed from the list and assigned to the cluster).*

| GO Term ID | Name | Log(pvalue) | LogSize | Frequency | Uniqueness | Dispensability |
| --- | --- | --- | --- | --- | --- | --- |
| GO:0006807 | nitrogen compound metabolic process | -3.00 | 3.89 | 40.56 | 0.86 | 0.00 |
| GO:0007154 | cell communication | -1.39 | 3.72 | 27.21 | 1.00 | 0.00 |
| GO:0007165 | signal transduction | -1.43 | 3.69 | 25.42 | 0.86 | 0.21 |
| GO:0008150 | biological_process | -1.66 | 4.28 | 100.00 | 1.00 | 0.00 |
| GO:0008152 | metabolic process | -1.51 | 3.96 | 48.11 | 1.00 | 0.00 |
| GO:0009893 | positive regulation of metabolic process | -1.51 | 3.49 | 16.18 | 0.84 | 0.59 |
| GO:0009987 | cellular process | -1.68 | 4.20 | 83.82 | 1.00 | 0.00 |
| GO:0010467 | gene expression | -1.51 | 3.25 | 9.38 | 0.91 | 0.23 |
| GO:0019222 | regulation of metabolic process | -1.51 | 3.76 | 30.24 | 0.86 | 0.23 |
| GO:0023052 | signaling | -1.39 | 3.71 | 26.56 | 0.86 | 0.21 |
| GO:0043170 | macromolecule metabolic process | -1.51 | 3.84 | 36.38 | 0.86 | 0.40 |
| GO:0044238 | primary metabolic process | -1.85 | 3.92 | 43.78 | 0.86 | 0.44 |
| GO:0048518 | positive regulation of biological process | -1.72 | 3.71 | 26.66 | 0.86 | 0.21 |
| GO:0048519 | negative regulation of biological process | -1.89 | 3.63 | 22.18 | 0.87 | 0.14 |
| GO:0048522 | positive regulation of cellular process | -2.30 | 3.65 | 23.43 | 0.82 | 0.00 |
| GO:0050789 | regulation of biological process | -1.64 | 4.06 | 60.16 | 0.83 | 0.32 |
| GO:0050794 | regulation of cellular process | -2.05 | 4.03 | 55.85 | 0.82 | 0.20 |
| GO:0050896 | response to stimulus | -1.43 | 3.88 | 39.84 | 1.00 | 0.00 |
| GO:0051239 | regulation of multicellular organismal process | -1.89 | 3.34 | 11.51 | 0.89 | 0.11 |
| GO:0065007 | biological regulation | -1.85 | 4.08 | 62.67 | 1.00 | 0.00 |
| GO:0065008 | regulation of biological quality | -1.47 | 3.37 | 12.18 | 0.90 | 0.10 |
| GO:0071704 | organic substance metabolic process | -1.51 | 3.94 | 45.74 | 0.85 | 0.47 |

Table S8: Statistically significant (p ≤0.05) strong positive (≥0.75) and strong negative (≤-0.75) correlation between lncRNA and differentially expressed genes in PBL samples.

| lncRNA_id | gene_id | correlation | p_value |
| --- | --- | --- | --- |
| XLOC_057036 | FXYD4 | 0.97 | 2.53E-11 |
| XLOC_057036 | TUBB1 | 0.94 | 2.04E-08 |
| XLOC_057036 | ENSBTAG00000011961 | 0.92 | 2.65E-07 |
| XLOC_064125 | TTC22 | 0.89 | 1.26E-05 |
| XLOC_064125 | ENSBTAG00000055168 | 0.87 | 3.70E-05 |
| XLOC_064125 | ENSBTAG00000053134 | 0.86 | 4.68E-05 |
| XLOC_064125 | LAMC1 | 0.86 | 6.03E-05 |
| XLOC_064125 | ENSBTAG00000051557 | 0.85 | 1.21E-04 |
| XLOC_064125 | CALD1 | 0.84 | 1.73E-04 |
| XLOC_057036 | HBB | 0.84 | 1.87E-04 |
| XLOC_064125 | LMNA | 0.84 | 1.92E-04 |
| XLOC_087236 | ENSBTAG00000048783 | 0.83 | 2.39E-04 |
| XLOC_064125 | ENSBTAG00000050753 | 0.82 | 3.42E-04 |
| XLOC_064125 | ADARB1 | 0.82 | 3.42E-04 |
| XLOC_064125 | SPINT2 | 0.82 | 3.97E-04 |
| XLOC_064125 | ENSBTAG00000051018 | 0.82 | 3.97E-04 |
| XLOC_087236 | ENSBTAG00000052050 | 0.82 | 3.97E-04 |
| XLOC_064125 | ENSBTAG00000049497 | 0.81 | 4.32E-04 |
| XLOC_064125 | ENSBTAG00000049658 | 0.81 | 4.32E-04 |
| XLOC_087236 | ENSBTAG00000039523 | 0.81 | 4.32E-04 |
| XLOC_064125 | LIMA1 | 0.80 | 5.40E-04 |
| XLOC_087236 | ENSBTAG00000051208 | 0.80 | 5.40E-04 |
| XLOC_087236 | GNG4 | 0.80 | 5.86E-04 |
| XLOC_064125 | ENSBTAG00000050538 | 0.80 | 6.03E-04 |
| XLOC_087236 | CHST10 | 0.80 | 6.85E-04 |
| XLOC_064125 | ABCC5 | 0.80 | 6.85E-04 |
| lncRNA_id | **gene_id** | **correlation** | **p_value** |
| XLOC_087236 | ADCY3 | 0.80 | 6.85E-04 |
| XLOC_064125 | ENSBTAG00000051935 | 0.79 | 7.65E-04 |
| XLOC_064125 | ENSBTAG00000049832 | 0.79 | 8.38E-04 |
| XLOC_064125 | ENSBTAG00000051474 | 0.79 | 8.38E-04 |
| XLOC_064125 | TUBB3 | 0.79 | 8.39E-04 |
| XLOC_064125 | SLC6A8 | 0.78 | 1.13E-03 |
| XLOC_087236 | LZTS1 | 0.78 | 1.13E-03 |
| XLOC_087236 | ENSBTAG00000052305 | 0.78 | 1.13E-03 |
| XLOC_087236 | CD300LG | 0.78 | 1.13E-03 |
| XLOC_064125 | SLC39A8 | 0.78 | 1.22E-03 |
| XLOC_064125 | TNKS1BP1 | 0.77 | 1.48E-03 |
| XLOC_064125 | ENSBTAG00000051086 | 0.77 | 1.55E-03 |
| XLOC_045577 | LIMA1 | 0.77 | 1.63E-03 |
| XLOC_087236 | ENSBTAG00000048498 | 0.77 | 1.79E-03 |
| XLOC_027299 | LIMA1 | 0.76 | 1.84E-03 |
| XLOC_064125 | TMTC1 | 0.76 | 2.06E-03 |
| XLOC_068463 | ENSBTAG00000049497 | 0.76 | 2.16E-03 |
| XLOC_087236 | NXNL2 | 0.76 | 2.16E-03 |
| XLOC_004951 | LAMC1 | 0.76 | 2.24E-03 |
| XLOC_027299 | SLC6A8 | 0.76 | 2.24E-03 |
| XLOC_004951 | SPINT2 | 0.76 | 2.24E-03 |
| XLOC_087236 | ENSBTAG00000050965 | 0.75 | 2.74E-03 |
| XLOC_017868 | ABCC5 | -0.76 | 2.26E-03 |
| XLOC_017868 | TMTC1 | -0.79 | 8.59E-04 |

Table S9: Differentially expressed genes between CHDL case and Control samples of bovine foot tissue of dairy cows. Genes were considered for Gene Set Enrichment Analysis if they had a log2 fold change greater than or equal to 1 or less than or equal to -1, an unadjusted p-value of 0.05 or lower and baseMean greater than or equal to 100.

| Gene ID | Gene name | Type | Strand | Gene biotype | baseMean | log2fc | Raw *P* - value | FDR |
| --- | --- | --- | --- | --- | --- | --- | --- | --- |
| ENSBTAG00000007268 | F13A1 | exon | + | protein_coding | 304.74 | -1.51 | 2.68E-08 | 0.00051 |
| ENSBTAG00000014713 | RARRES1 | exon | + | protein_coding | 156.23 | -1.90 | 4.16E-08 | 0.00051 |
| ENSBTAG00000049220 | ensembl | exon | + | protein_coding | 396.38 | -2.22 | 4.36E-06 | 0.02138 |
| ENSBTAG00000018137 | A2M | exon | + | protein_coding | 2352.13 | -1.89 | 1.14E-05 | 0.03976 |
| ENSBTAG00000004305 | RGS16 | exon | - | protein_coding | 138.86 | -1.33 | 3.75E-05 | 0.06571 |
| ENSBTAG00000018694 | ACSS3 | exon | + | protein_coding | 219.06 | -1.30 | 4.34E-05 | 0.07090 |
| ENSBTAG00000007153 | C1QA | exon | - | protein_coding | 131.84 | -2.04 | 5.38E-05 | 0.07324 |
| ENSBTAG00000012866 | THBS4 | exon | + | protein_coding | 5395.44 | -1.09 | 6.89E-05 | 0.07324 |
| ENSBTAG00000046158 | CFB | exon | - | protein_coding | 265.51 | -2.39 | 7.72E-05 | 0.07324 |
| ENSBTAG00000009607 | LARGE2 | exon | + | protein_coding | 109.88 | 1.18 | 0.00026241 | 0.18376 |
| ENSBTAG00000007196 | TAGLN | exon | + | protein_coding | 740.84 | -1.34 | 0.00036311 | 0.24053 |
| ENSBTAG00000018772 | TAF1C | exon | - | protein_coding | 127.35 | 1.09 | 0.00037427 | 0.24140 |
| ENSBTAG00000020056 | COL12A1 | exon | - | protein_coding | 16256.50 | -1.36 | 0.00040743 | 0.25605 |
| ENSBTAG00000004401 | UGGT2 | exon | - | protein_coding | 115.82 | -1.47 | 0.00050801 | 0.29957 |
| ENSBTAG00000012057 | CBLIF | exon | - | protein_coding | 948.36 | -2.72 | 0.00081765 | 0.44500 |
| ENSBTAG00000007687 | GDF6 | exon | + | protein_coding | 129.72 | -1.45 | 0.00096548 | 0.48294 |
| ENSBTAG00000004094 | SPARCL1 | exon | - | protein_coding | 972.37 | -1.52 | 0.00102567 | 0.50278 |
| ENSBTAG00000004950 | BRB | exon | + | protein_coding | 157.35 | -1.26 | 0.00167672 | 0.65622 |
| ENSBTAG00000000329 | MEGF10 | exon | - | protein_coding | 233.33 | -1.10 | 0.00179104 | 0.67956 |
| ENSBTAG00000038496 | CR2 | exon | + | protein_coding | 209.94 | -1.73 | 0.00182524 | 0.67956 |
| ENSBTAG00000007596 | GEM | exon | + | protein_coding | 1074.43 | -1.01 | 0.00215113 | 0.72338 |
| ENSBTAG00000008636 | PDE4B | exon | - | protein_coding | 539.89 | -1.24 | 0.00218593 | 0.72338 |
| ENSBTAG00000018453 | ANKRD37 | exon | + | protein_coding | 147.81 | -1.38 | 0.00212421 | 0.72338 |
| ENSBTAG00000038048 | MRC1 | exon | + | protein_coding | 145.73 | -1.68 | 0.00203022 | 0.72338 |
| ENSBTAG00000002699 | KIT | exon | + | protein_coding | 303.03 | -1.24 | 0.00299846 | 0.88426 |
| ENSBTAG00000011137 | MORN4 | exon | - | protein_coding | 165.35 | 1.06 | 0.00321304 | 0.88426 |
| ENSBTAG00000026181 | UGT1A6 | exon | + | protein_coding | 134.78 | 2.87 | 0.00299871 | 0.88426 |
| ENSBTAG00000039571 | PROSER2 | exon | - | protein_coding | 220.87 | -1.05 | 0.00332154 | 0.88426 |
| ENSBTAG00000015032 | CD14 | exon | - | protein_coding | 158.73 | -1.40 | 0.00417486 | 0.96674 |
| ENSBTAG00000024545 | DCHS2 | exon | + | protein_coding | 535.64 | -1.36 | 0.00402213 | 0.96674 |
| ENSBTAG00000049468 | ensembl | exon | + | protein_coding | 2919.69 | -3.66 | 0.00411704 | 0.96674 |
| ENSBTAG00000001260 | PINLYP | exon | + | protein_coding | 1151.62 | -1.09 | 0.01876505 | 0.99998 |
| ENSBTAG00000001729 | DUSP10 | exon | - | protein_coding | 250.29 | -1.95 | 0.00451177 | 0.99998 |
| ENSBTAG00000002392 | ensembl | exon | - | protein_coding | 270.26 | -1.43 | 0.01807183 | 0.99998 |
| ENSBTAG00000002551 | KCNJ8 | exon | + | protein_coding | 162.58 | -1.41 | 0.00512856 | 0.99998 |
| ENSBTAG00000002765 | CYP24A1 | exon | - | protein_coding | 651.07 | -1.83 | 0.04581755 | 0.99998 |
| ENSBTAG00000003505 | DCN | exon | - | protein_coding | 12131.21 | -1.14 | 0.00968011 | 0.99998 |
| ENSBTAG00000004261 | SPON2 | exon | + | protein_coding | 195.24 | -1.03 | 0.00744949 | 0.99998 |
| ENSBTAG00000004321 | SFXN2 | exon | + | protein_coding | 139.94 | 1.22 | 0.04264479 | 0.99998 |
| ENSBTAG00000004556 | SLC2A3 | exon | - | protein_coding | 440.59 | -1.14 | 0.02628 | 0.99998 |
| ENSBTAG00000004840 | C1S | exon | - | protein_coding | 1462.36 | -1.35 | 0.02368444 | 0.99998 |
| ENSBTAG00000006784 | PLA2G4B | exon | + | protein_coding | 241.08 | 1.68 | 0.01290651 | 0.99998 |
| ENSBTAG00000007835 | GPT | exon | - | protein_coding | 133.06 | 1.10 | 0.00918577 | 0.99998 |
| ENSBTAG00000008612 | C1R | exon | + | protein_coding | 798.53 | -1.32 | 0.02351503 | 0.99998 |
| ENSBTAG00000009705 | SERPINF1 | exon | + | protein_coding | 815.25 | -1.26 | 0.04916681 | 0.99998 |
| ENSBTAG00000009717 | FGL2 | exon | + | protein_coding | 669.68 | -1.56 | 0.01422985 | 0.99998 |
| ENSBTAG00000009725 | AOX1 | exon | + | protein_coding | 443.00 | -1.31 | 0.0388592 | 0.99998 |
| ENSBTAG00000011082 | IGF1 | exon | - | protein_coding | 123.08 | -1.13 | 0.04296324 | 0.99998 |
| ENSBTAG00000011424 | TPM2 | exon | - | protein_coding | 107.64 | -1.13 | 0.02515967 | 0.99998 |
| ENSBTAG00000011545 | GDA | exon | + | protein_coding | 127.63 | -1.07 | 0.02143315 | 0.99998 |
| ENSBTAG00000011847 | ASPN | exon | - | protein_coding | 2021.54 | -1.07 | 0.03078014 | 0.99998 |
| ENSBTAG00000012164 | CP | exon | + | protein_coding | 141.95 | -1.67 | 0.03003764 | 0.99998 |
| ENSBTAG00000012409 | POSTN | exon | + | protein_coding | 607.97 | -1.96 | 0.03445466 | 0.99998 |
| ENSBTAG00000012637 | ECRG4 | exon | - | protein_coding | 183.52 | -1.21 | 0.00891253 | 0.99998 |
| ENSBTAG00000013125 | PLAUR | exon | - | protein_coding | 193.16 | -1.62 | 0.01095787 | 0.99998 |
| ENSBTAG00000013176 | SMOC2 | exon | + | protein_coding | 371.43 | -1.17 | 0.0209308 | 0.99998 |
| ENSBTAG00000013178 | ALAS2 | exon | - | protein_coding | 142.18 | 1.60 | 0.01239996 | 0.99998 |
| ENSBTAG00000013347 | DMPK | exon | - | protein_coding | 212.59 | 1.19 | 0.03109429 | 0.99998 |
| ENSBTAG00000013736 | PROM1 | exon | - | protein_coding | 683.01 | 1.02 | 0.04888831 | 0.99998 |
| ENSBTAG00000014614 | ACTA2 | exon | - | protein_coding | 195.21 | -1.41 | 0.02550321 | 0.99998 |
| ENSBTAG00000015636 | SHFL | exon | + | protein_coding | 166.57 | -1.03 | 0.03303559 | 0.99998 |
| ENSBTAG00000015979 | SEZ6 | exon | - | protein_coding | 171.30 | 1.39 | 0.02237853 | 0.99998 |
| ENSBTAG00000015988 | MYH11 | exon | - | protein_coding | 580.93 | -1.30 | 0.04702311 | 0.99998 |
| ENSBTAG00000016026 | PCOLCE2 | exon | + | protein_coding | 283.44 | -1.43 | 0.03816806 | 0.99998 |
| ENSBTAG00000017411 | AK5 | exon | - | protein_coding | 103.10 | -1.52 | 0.01118114 | 0.99998 |
| ENSBTAG00000017665 | DHRS4 | exon | - | protein_coding | 743.64 | -1.06 | 0.02193494 | 0.99998 |
| ENSBTAG00000018223 | CHI3L1 | exon | - | protein_coding | 147.60 | -3.55 | 0.00853572 | 0.99998 |
| ENSBTAG00000018644 | PDZRN3 | exon | + | protein_coding | 132.89 | -1.14 | 0.02794543 | 0.99998 |
| ENSBTAG00000019099 | SLC25A37 | exon | + | protein_coding | 1157.86 | 1.06 | 0.01190405 | 0.99998 |
| ENSBTAG00000020884 | CASP4 | exon | + | protein_coding | 147.43 | -1.12 | 0.00748916 | 0.99998 |
| ENSBTAG00000021434 | EDN2 | exon | + | protein_coding | 613.22 | -3.83 | 0.03986857 | 0.99998 |
| ENSBTAG00000021697 | PDGFB | exon | - | protein_coding | 139.08 | 1.05 | 0.0271749 | 0.99998 |
| ENSBTAG00000023026 | ensembl | exon | - | protein_coding | 448.30 | -1.46 | 0.0140893 | 0.99998 |
| ENSBTAG00000023179 | TRIB1 | exon | - | protein_coding | 270.67 | -1.19 | 0.04731203 | 0.99998 |
| ENSBTAG00000024874 | MAD2L1 | exon | - | protein_coding | 863.48 | 1.38 | 0.02671757 | 0.99998 |
| ENSBTAG00000033319 | CD200 | exon | + | protein_coding | 128.14 | -1.03 | 0.04086136 | 0.99998 |
| ENSBTAG00000033429 | FAM229B | exon | - | protein_coding | 322.94 | 1.26 | 0.03000857 | 0.99998 |
| ENSBTAG00000037539 | ensembl | exon | - | protein_coding | 112.73 | -1.35 | 0.04183646 | 0.99998 |
| ENSBTAG00000038674 | ZNF677 | exon | + | protein_coding | 170.11 | 1.44 | 0.01415947 | 0.99998 |
| ENSBTAG00000039255 | CLDN17 | exon | + | protein_coding | 395.79 | -1.45 | 0.03183761 | 0.99998 |
| ENSBTAG00000040406 | ensembl | exon | + | protein_coding | 254.60 | 4.10 | 0.02583923 | 0.99998 |
| ENSBTAG00000046772 | CLEC3A | exon | + | protein_coding | 156.99 | -2.28 | 0.01156746 | 0.99998 |
| ENSBTAG00000047807 | SAPCD2 | exon | - | protein_coding | 213.57 | 1.06 | 0.02796946 | 0.99998 |
| ENSBTAG00000049772 | ensembl | exon | - | protein_coding | 178.10 | 1.21 | 0.0335275 | 0.99998 |
| ENSBTAG00000050662 | ensembl | exon | - | protein_coding | 20322.20 | -2.48 | 0.00913869 | 0.99998 |
| ENSBTAG00000051364 | ensembl | exon | - | protein_coding | 2753.03 | -1.47 | 0.0151327 | 0.99998 |
| ENSBTAG00000051898 | FGF7 | exon | - | protein_coding | 418.02 | -1.28 | 0.04219252 | 0.99998 |
| ENSBTAG00000052340 | ensembl | exon | - | protein_coding | 12180.76 | -3.46 | 0.01348724 | 0.99998 |
| ENSBTAG00000052530 | ensembl | exon | - | protein_coding | 103.39 | -1.92 | 0.04499218 | 0.99998 |
| ENSBTAG00000054120 | HPSE2 | exon | - | protein_coding | 113.40 | -1.37 | 0.01483765 | 0.99998 |
| ENSBTAG00000054173 | ensembl | exon | + | protein_coding | 6116.85 | -3.12 | 0.0105624 | 0.99998 |

Table S10: Gene Set Enrichment Analysis (GSEA) table presents the significant biological processes (BP) enriched among the differentially expressed genes (DEGs; LFC ³ 1, baseMean ³ 100 and unadjusted p-value £ 0.05) in CHDL Case samples compared to Control samples of bovine foot tissue. Columns include the Ontology and Gene Ontology ID, Ontology description, the number of genes in the set (setSize), the normalized enrichment score (NES), and the FDR p-value, gene set name. Positive NES values represent enrichment in upregulated genes, while negative NES values indicate enrichment in downregulated genes.

| ONTOLOGY | ID | Description | setSize | NES | FDR | Gene set enriched |
| --- | --- | --- | --- | --- | --- | --- |
| BP | GO:0001525 | angiogenesis | 3 | -1.69 | 0.006 | ENSBTAG00000018223/ENSBTAG00000021434 |
| BP | GO:0035239 | tube morphogenesis | 3 | -1.69 | 0.006 | ENSBTAG00000018223/ENSBTAG00000021434 |
| BP | GO:0048514 | blood vessel morphogenesis | 3 | -1.69 | 0.006 | ENSBTAG00000018223/ENSBTAG00000021434 |
| BP | GO:0002684 | positive regulation of immune system process | 6 | -1.76 | 0.010 | ENSBTAG00000001729/ENSBTAG00000007153/ENSBTAG00000046158/ENSBTAG00000021434 |
| BP | GO:0051246 | regulation of protein metabolic process | 5 | -1.64 | 0.018 | ENSBTAG00000009717/ENSBTAG00000013125/ENSBTAG00000001729/ENSBTAG00000018223 |
| BP | GO:0001775 | cell activation | 5 | -1.62 | 0.022 | ENSBTAG00000009717/ENSBTAG00000001729/ENSBTAG00000007153/ENSBTAG00000021434 |
| BP | GO:0045321 | leukocyte activation | 5 | -1.62 | 0.022 | ENSBTAG00000009717/ENSBTAG00000001729/ENSBTAG00000007153/ENSBTAG00000021434 |
| BP | GO:0034097 | response to cytokine | 5 | -1.61 | 0.022 | ENSBTAG00000018223/ENSBTAG00000021434 |
| BP | GO:0001932 | regulation of protein phosphorylation | 3 | -1.57 | 0.024 | ENSBTAG00000001729/ENSBTAG00000018223 |
| BP | GO:0019220 | regulation of phosphate metabolic process | 3 | -1.57 | 0.024 | ENSBTAG00000001729/ENSBTAG00000018223 |
| BP | GO:0031399 | regulation of protein modification process | 3 | -1.57 | 0.024 | ENSBTAG00000001729/ENSBTAG00000018223 |
| BP | GO:0042325 | regulation of phosphorylation | 3 | -1.57 | 0.024 | ENSBTAG00000001729/ENSBTAG00000018223 |
| BP | GO:0051174 | regulation of phosphorus metabolic process | 3 | -1.57 | 0.024 | ENSBTAG00000001729/ENSBTAG00000018223 |
| BP | GO:0071345 | cellular response to cytokine stimulus | 4 | -1.65 | 0.025 | ENSBTAG00000018223/ENSBTAG00000021434 |
| BP | GO:0022008 | neurogenesis | 4 | -1.65 | 0.025 | ENSBTAG00000001729/ENSBTAG00000007153/ENSBTAG00000021434 |
| BP | GO:0035295 | tube development | 4 | -1.65 | 0.025 | ENSBTAG00000018223/ENSBTAG00000021434 |
| BP | GO:0001568 | blood vessel development | 4 | -1.62 | 0.030 | ENSBTAG00000014614/ENSBTAG00000018223/ENSBTAG00000021434 |
| BP | GO:0001944 | vasculature development | 4 | -1.62 | 0.030 | ENSBTAG00000014614/ENSBTAG00000018223/ENSBTAG00000021434 |
| BP | GO:0048646 | anatomical structure formation involved in morphogenesis | 4 | -1.62 | 0.030 | ENSBTAG00000014614/ENSBTAG00000018223/ENSBTAG00000021434 |
| BP | GO:0072359 | circulatory system development | 4 | -1.62 | 0.030 | ENSBTAG00000014614/ENSBTAG00000018223/ENSBTAG00000021434 |
| BP | GO:0022407 | regulation of cell-cell adhesion | 3 | -1.55 | 0.031 | ENSBTAG00000013125/ENSBTAG00000001729 |
| BP | GO:0030155 | regulation of cell adhesion | 3 | -1.55 | 0.031 | ENSBTAG00000013125/ENSBTAG00000001729 |
| BP | GO:0051247 | positive regulation of protein metabolic process | 3 | -1.55 | 0.031 | ENSBTAG00000013125/ENSBTAG00000018223 |
| BP | GO:0035556 | intracellular signal transduction | 6 | -1.61 | 0.037 | ENSBTAG00000007687/ENSBTAG00000013125/ENSBTAG00000001729/ENSBTAG00000018223/ENSBTAG00000021434 |
| BP | GO:0050790 | regulation of catalytic activity | 5 | -1.58 | 0.046 | ENSBTAG00000009717/ENSBTAG00000013125/ENSBTAG00000001729/ENSBTAG00000018223 |
| BP | GO:0048584 | positive regulation of response to stimulus | 10 | -1.53 | 0.047 | ENSBTAG00000004840/ENSBTAG00000015032/ENSBTAG00000007687/ENSBTAG00000013125/ENSBTAG00000007153/ENSBTAG00000046158/ENSBTAG00000018223/ENSBTAG00000021434 |
| BP | GO:0006793 | phosphorus metabolic process | 5 | -1.57 | 0.048 | ENSBTAG00000017411/ENSBTAG00000013125/ENSBTAG00000001729/ENSBTAG00000018223 |
| BP | GO:0006796 | phosphate-containing compound metabolic process | 5 | -1.57 | 0.048 | ENSBTAG00000017411/ENSBTAG00000013125/ENSBTAG00000001729/ENSBTAG00000018223 |
| BP | GO:0016310 | phosphorylation | 5 | -1.57 | 0.048 | ENSBTAG00000017411/ENSBTAG00000013125/ENSBTAG00000001729/ENSBTAG00000018223 |

*Table S11: Gene ontology enrichment summary by Revigo for differentially expressed genes identified in foot tissue samples. Columns include log(pvalue) of GO enrichment of term, LogSize (the Log10(number of annotations for GO Term ID in Bos Taurus in the EBI GOA database)), Frequency (the proportion of the GO term in the underlying Bos Taurus protein annotation database – higher frequency implies more general terms, lower frequency implies more specific terms), Uniqueness (a measure of whether the term is an outlier compared to the whole list – calculated by 1-(avg. semantic similarity of term to all other terms) – typically the more unique the term the less dispensable) and Dispensability (semantic similarity threshold at which the term was removed from the list and assigned to the cluster).*

| GO Term ID | Name | Log(pvalue) | LogSize | Frequency | Uniqueness | Dispensability |
| --- | --- | --- | --- | --- | --- | --- |
| GO:0001775 | cell activation | -1.66 | 2.73 | 2.79 | 0.85 | 0.23 |
| GO:0001932 | regulation of protein phosphorylation | -1.62 | 2.93 | 4.42 | 0.71 | 0.06 |
| GO:0019220 | regulation of phosphate metabolic process | -1.62 | 3.02 | 5.46 | 0.76 | 0.93 |
| GO:0042325 | regulation of phosphorylation | -1.62 | 2.97 | 4.91 | 0.76 | 0.90 |
| GO:0001944 | vasculature development | -1.52 | 2.60 | 2.07 | 0.67 | 0.49 |
| GO:0002684 | positive regulation of immune system process | -2.00 | 2.89 | 4.04 | 0.91 | 0.00 |
| GO:0006793 | phosphorus metabolic process | -1.32 | 3.23 | 8.94 | 0.96 | 0.24 |
| GO:0016310 | phosphorylation | -1.32 | 2.93 | 4.45 | 0.92 | 0.01 |
| GO:0006796 | phosphate-containing compound metabolic process | -1.32 | 3.23 | 8.81 | 0.92 | 0.79 |
| GO:0022008 | neurogenesis | -1.60 | 2.98 | 5.04 | 0.70 | 0.55 |
| GO:0022407 | regulation of cell-cell adhesion | -1.51 | 2.55 | 1.85 | 0.94 | 0.07 |
| GO:0030155 | regulation of cell adhesion | -1.51 | 2.75 | 2.96 | 0.94 | 0.08 |
| GO:0031399 | regulation of protein modification process | -1.62 | 3.04 | 5.78 | 0.79 | 0.67 |
| GO:0051247 | positive regulation of protein metabolic process | -1.51 | 3.04 | 5.70 | 0.76 | 0.70 |
| GO:0034097 | response to cytokine | -1.66 | 2.82 | 3.44 | 0.94 | 0.62 |
| GO:0035239 | tube morphogenesis | -2.22 | 2.70 | 2.60 | 0.67 | 0.00 |
| GO:0001525 | angiogenesis | -2.22 | 2.36 | 1.18 | 0.63 | 0.90 |
| GO:0001568 | blood vessel development | -1.52 | 2.58 | 1.98 | 0.65 | 0.94 |
| GO:0048514 | blood vessel morphogenesis | -2.22 | 2.49 | 1.61 | 0.62 | 0.84 |
| GO:0035295 | tube development | -1.60 | 2.82 | 3.43 | 0.73 | 0.46 |
| GO:0035556 | intracellular signal transduction | -1.43 | 3.09 | 6.48 | 0.90 | 0.24 |
| GO:0045321 | leukocyte activation | -1.66 | 2.66 | 2.40 | 0.86 | 0.23 |
| GO:0048584 | positive regulation of response to stimulus | -1.33 | 3.23 | 8.85 | 0.90 | 0.34 |
| GO:0048646 | anatomical structure formation involved in morphogenesis | -1.52 | 2.85 | 3.71 | 0.75 | 0.63 |
| GO:0050790 | regulation of catalytic activity | -1.34 | 3.15 | 7.40 | 0.95 | 0.06 |
| GO:0051174 | regulation of phosphorus metabolic process | -1.62 | 3.02 | 5.46 | 0.83 | 0.36 |
| GO:0051246 | regulation of protein metabolic process | -1.74 | 3.30 | 10.54 | 0.82 | 0.38 |
| GO:0071345 | cellular response to cytokine stimulus | -1.60 | 2.77 | 3.09 | 0.94 | 0.00 |
| GO:0072359 | circulatory system development | -1.52 | 2.82 | 3.46 | 0.72 | 0.48 |

Table S12: Statistically significant (p ≤0.05) strong positive (≥0.75) and strong negative (≤-0.75) correlation between lncRNA and differentially expressed genes in foot tissue samples.

| lncRNA_id | gene_id | correlation | p_value |
| --- | --- | --- | --- |
| XLOC_010130 | ENSBTAG00000042498 | 1.00 | 0.00E+00 |
| XLOC_018904 | ENSBTAG00000042498 | 1.00 | 0.00E+00 |
| XLOC_023340 | ENSBTAG00000042498 | 1.00 | 0.00E+00 |
| XLOC_023830 | ENSBTAG00000042498 | 1.00 | 0.00E+00 |
| XLOC_024584 | ENSBTAG00000042498 | 1.00 | 0.00E+00 |
| XLOC_031565 | ENSBTAG00000042498 | 1.00 | 0.00E+00 |
| XLOC_042004 | ENSBTAG00000042498 | 1.00 | 0.00E+00 |
| XLOC_013169 | ENSBTAG00000042498 | 1.00 | 0.00E+00 |
| XLOC_039169 | ENSBTAG00000042498 | 1.00 | 0.00E+00 |
| XLOC_000383 | ENSBTAG00000042498 | 1.00 | 8.23E-91 |
| XLOC_000438 | ENSBTAG00000042498 | 1.00 | 0.00E+00 |
| XLOC_029777 | ENSBTAG00000042498 | 1.00 | 8.66E-90 |
| XLOC_038031 | ENSBTAG00000042498 | 1.00 | 0.00E+00 |
| XLOC_042632 | ENSBTAG00000042498 | 1.00 | 0.00E+00 |
| XLOC_041515 | ENSBTAG00000042498 | 1.00 | 0.00E+00 |
| XLOC_010130 | BPIFB1 | 1.00 | 0.00E+00 |
| XLOC_018904 | BPIFB1 | 1.00 | 2.94E-90 |
| XLOC_023340 | BPIFB1 | 1.00 | 2.86E-94 |
| XLOC_023830 | BPIFB1 | 1.00 | 2.86E-94 |
| XLOC_024584 | BPIFB1 | 1.00 | 0.00E+00 |
| XLOC_031565 | BPIFB1 | 1.00 | 2.94E-90 |
| XLOC_042004 | BPIFB1 | 1.00 | 0.00E+00 |
| XLOC_013169 | BPIFB1 | 1.00 | 0.00E+00 |
| XLOC_039169 | BPIFB1 | 1.00 | 0.00E+00 |
| lncRNA_id | **gene_id** | **correlation** | **p_value** |
| XLOC_000383 | BPIFB1 | 1.00 | 1.64E-92 |
| XLOC_000438 | BPIFB1 | 1.00 | 0.00E+00 |
| XLOC_029777 | BPIFB1 | 1.00 | 1.54E-91 |
| XLOC_038031 | BPIFB1 | 1.00 | 0.00E+00 |
| XLOC_042632 | BPIFB1 | 1.00 | 1.64E-92 |
| XLOC_041515 | BPIFB1 | 1.00 | 0.00E+00 |
| XLOC_010130 | KNCN | 1.00 | 0.00E+00 |
| XLOC_018904 | KNCN | 1.00 | 0.00E+00 |
| XLOC_023340 | KNCN | 1.00 | 2.86E-94 |
| XLOC_023830 | KNCN | 1.00 | 2.86E-94 |
| XLOC_024584 | KNCN | 1.00 | 0.00E+00 |
| XLOC_031565 | KNCN | 1.00 | 0.00E+00 |
| XLOC_042004 | KNCN | 1.00 | 0.00E+00 |
| XLOC_013169 | KNCN | 1.00 | 0.00E+00 |
| XLOC_039169 | KNCN | 1.00 | 0.00E+00 |
| XLOC_000383 | KNCN | 1.00 | 0.00E+00 |
| XLOC_000438 | KNCN | 1.00 | 0.00E+00 |
| XLOC_029777 | KNCN | 1.00 | 0.00E+00 |
| XLOC_038031 | KNCN | 1.00 | 0.00E+00 |
| XLOC_042632 | KNCN | 1.00 | 0.00E+00 |
| XLOC_041515 | KNCN | 1.00 | 2.86E-94 |
| XLOC_010130 | ENSBTAG00000048419 | 1.00 | 0.00E+00 |
| XLOC_018904 | ENSBTAG00000048419 | 1.00 | 1.54E-91 |
| XLOC_023340 | ENSBTAG00000048419 | 1.00 | 0.00E+00 |
| XLOC_023830 | ENSBTAG00000048419 | 1.00 | 0.00E+00 |
| XLOC_024584 | ENSBTAG00000048419 | 1.00 | 0.00E+00 |
| XLOC_031565 | ENSBTAG00000048419 | 1.00 | 1.54E-91 |
| XLOC_042004 | ENSBTAG00000048419 | 1.00 | 0.00E+00 |
| XLOC_013169 | ENSBTAG00000048419 | 1.00 | 0.00E+00 |
| XLOC_039169 | ENSBTAG00000048419 | 1.00 | 0.00E+00 |
| XLOC_000383 | ENSBTAG00000048419 | 1.00 | 0.00E+00 |
| XLOC_000438 | ENSBTAG00000048419 | 1.00 | 0.00E+00 |
| XLOC_029777 | ENSBTAG00000048419 | 1.00 | 0.00E+00 |
| XLOC_038031 | ENSBTAG00000048419 | 1.00 | 0.00E+00 |
| XLOC_042632 | ENSBTAG00000048419 | 1.00 | 0.00E+00 |
| XLOC_041515 | ENSBTAG00000048419 | 1.00 | 1.54E-91 |
| XLOC_010130 | ENSBTAG00000048831 | 1.00 | 0.00E+00 |
| XLOC_018904 | ENSBTAG00000048831 | 1.00 | 0.00E+00 |
| XLOC_023340 | ENSBTAG00000048831 | 1.00 | 0.00E+00 |
| XLOC_023830 | ENSBTAG00000048831 | 1.00 | 0.00E+00 |
| XLOC_024584 | ENSBTAG00000048831 | 1.00 | 0.00E+00 |
| XLOC_031565 | ENSBTAG00000048831 | 1.00 | 0.00E+00 |
| XLOC_042004 | ENSBTAG00000048831 | 1.00 | 0.00E+00 |
| XLOC_013169 | ENSBTAG00000048831 | 1.00 | 2.94E-90 |
| XLOC_039169 | ENSBTAG00000048831 | 1.00 | 2.94E-90 |
| XLOC_000383 | ENSBTAG00000048831 | 1.00 | 0.00E+00 |
| XLOC_000438 | ENSBTAG00000048831 | 1.00 | 0.00E+00 |
| XLOC_029777 | ENSBTAG00000048831 | 1.00 | 0.00E+00 |
| XLOC_038031 | ENSBTAG00000048831 | 1.00 | 8.23E-91 |
| XLOC_042632 | ENSBTAG00000048831 | 1.00 | 0.00E+00 |
| XLOC_041515 | ENSBTAG00000048831 | 1.00 | 8.66E-90 |
| XLOC_010130 | FUT9 | 1.00 | 1.54E-91 |
| XLOC_018904 | FUT9 | 1.00 | 0.00E+00 |
| XLOC_023340 | FUT9 | 1.00 | 1.54E-91 |
| XLOC_023830 | FUT9 | 1.00 | 1.54E-91 |
| XLOC_024584 | FUT9 | 1.00 | 1.64E-92 |
| XLOC_031565 | FUT9 | 1.00 | 0.00E+00 |
| XLOC_042004 | FUT9 | 1.00 | 2.86E-94 |
| XLOC_013169 | FUT9 | 1.00 | 0.00E+00 |
| XLOC_039169 | FUT9 | 1.00 | 0.00E+00 |
| XLOC_000383 | FUT9 | 1.00 | 1.54E-91 |
| XLOC_000438 | FUT9 | 1.00 | 8.23E-91 |
| XLOC_029777 | FUT9 | 1.00 | 2.94E-90 |
| XLOC_038031 | FUT9 | 1.00 | 2.86E-94 |
| XLOC_042632 | FUT9 | 1.00 | 1.64E-92 |
| XLOC_041515 | FUT9 | 1.00 | 2.12E-89 |
| XLOC_010130 | ENSBTAG00000042477 | 1.00 | 1.54E-91 |
| XLOC_018904 | ENSBTAG00000042477 | 1.00 | 0.00E+00 |
| XLOC_023340 | ENSBTAG00000042477 | 1.00 | 1.54E-91 |
| XLOC_023830 | ENSBTAG00000042477 | 1.00 | 1.54E-91 |
| XLOC_024584 | ENSBTAG00000042477 | 1.00 | 1.64E-92 |
| XLOC_031565 | ENSBTAG00000042477 | 1.00 | 0.00E+00 |
| XLOC_042004 | ENSBTAG00000042477 | 1.00 | 2.86E-94 |
| XLOC_013169 | ENSBTAG00000042477 | 1.00 | 0.00E+00 |
| XLOC_039169 | ENSBTAG00000042477 | 1.00 | 0.00E+00 |
| XLOC_000383 | ENSBTAG00000042477 | 1.00 | 1.54E-91 |
| XLOC_000438 | ENSBTAG00000042477 | 1.00 | 8.23E-91 |
| XLOC_029777 | ENSBTAG00000042477 | 1.00 | 2.94E-90 |
| XLOC_038031 | ENSBTAG00000042477 | 1.00 | 2.86E-94 |
| XLOC_042632 | ENSBTAG00000042477 | 1.00 | 1.64E-92 |
| XLOC_041515 | ENSBTAG00000042477 | 1.00 | 2.12E-89 |
| XLOC_010130 | U6 | 1.00 | 1.54E-91 |
| XLOC_018904 | U6 | 1.00 | 0.00E+00 |
| XLOC_023340 | U6 | 1.00 | 1.54E-91 |
| XLOC_023830 | U6 | 1.00 | 1.54E-91 |
| XLOC_024584 | U6 | 1.00 | 1.64E-92 |
| XLOC_031565 | U6 | 1.00 | 0.00E+00 |
| XLOC_042004 | U6 | 1.00 | 2.86E-94 |
| XLOC_013169 | U6 | 1.00 | 0.00E+00 |
| XLOC_039169 | U6 | 1.00 | 0.00E+00 |
| XLOC_000383 | U6 | 1.00 | 1.54E-91 |
| XLOC_000438 | U6 | 1.00 | 8.23E-91 |
| XLOC_029777 | U6 | 1.00 | 2.94E-90 |
| XLOC_038031 | U6 | 1.00 | 2.86E-94 |
| XLOC_042632 | U6 | 1.00 | 1.64E-92 |
| XLOC_041515 | U6 | 1.00 | 2.12E-89 |
| XLOC_010130 | KIR3DL1 | 1.00 | 1.54E-91 |
| XLOC_018904 | KIR3DL1 | 1.00 | 0.00E+00 |
| XLOC_023340 | KIR3DL1 | 1.00 | 1.54E-91 |
| XLOC_023830 | KIR3DL1 | 1.00 | 1.54E-91 |
| XLOC_024584 | KIR3DL1 | 1.00 | 1.64E-92 |
| XLOC_031565 | KIR3DL1 | 1.00 | 0.00E+00 |
| XLOC_042004 | KIR3DL1 | 1.00 | 2.86E-94 |
| XLOC_013169 | KIR3DL1 | 1.00 | 0.00E+00 |
| XLOC_039169 | KIR3DL1 | 1.00 | 0.00E+00 |
| XLOC_000383 | KIR3DL1 | 1.00 | 1.54E-91 |
| XLOC_000438 | KIR3DL1 | 1.00 | 8.23E-91 |
| XLOC_029777 | KIR3DL1 | 1.00 | 2.94E-90 |
| XLOC_038031 | KIR3DL1 | 1.00 | 2.86E-94 |
| XLOC_042632 | KIR3DL1 | 1.00 | 1.64E-92 |
| XLOC_041515 | KIR3DL1 | 1.00 | 2.12E-89 |
| XLOC_000293 | 7SK | 1.00 | 3.55E-21 |
| XLOC_006374 | 7SK | 1.00 | 3.04E-20 |
| XLOC_009264 | 7SK | 0.99 | 7.11E-12 |
| XLOC_006273 | 7SK | 0.99 | 7.93E-10 |
| XLOC_006273 | ENSBTAG00000042498 | 0.95 | 1.75E-06 |
| XLOC_006273 | BPIFB1 | 0.95 | 1.75E-06 |
| XLOC_006273 | KNCN | 0.95 | 1.75E-06 |
| XLOC_006273 | ENSBTAG00000048419 | 0.95 | 1.75E-06 |
| XLOC_006273 | ENSBTAG00000048831 | 0.95 | 1.75E-06 |
| XLOC_006273 | FUT9 | 0.95 | 1.75E-06 |
| XLOC_006273 | ENSBTAG00000042477 | 0.95 | 1.75E-06 |
| XLOC_006273 | U6 | 0.95 | 1.75E-06 |
| XLOC_006273 | KIR3DL1 | 0.95 | 1.75E-06 |
| XLOC_029340 | ENSBTAG00000042498 | 0.92 | 1.92E-05 |
| XLOC_029340 | BPIFB1 | 0.92 | 1.92E-05 |
| XLOC_029340 | KNCN | 0.92 | 1.92E-05 |
| XLOC_029340 | ENSBTAG00000048419 | 0.92 | 1.92E-05 |
| XLOC_029340 | ENSBTAG00000048831 | 0.92 | 1.92E-05 |
| XLOC_029340 | FUT9 | 0.92 | 1.92E-05 |
| XLOC_029340 | ENSBTAG00000042477 | 0.92 | 1.92E-05 |
| XLOC_029340 | U6 | 0.92 | 1.92E-05 |
| XLOC_029340 | KIR3DL1 | 0.92 | 1.92E-05 |
| XLOC_005470 | bta-mir-2285cu | 0.90 | 8.52E-05 |
| XLOC_006374 | ENSBTAG00000042498 | 0.89 | 1.10E-04 |
| XLOC_006374 | BPIFB1 | 0.89 | 1.10E-04 |
| XLOC_006374 | KNCN | 0.89 | 1.10E-04 |
| XLOC_006374 | ENSBTAG00000048419 | 0.89 | 1.10E-04 |
| XLOC_006374 | ENSBTAG00000048831 | 0.89 | 1.10E-04 |
| XLOC_006374 | FUT9 | 0.89 | 1.10E-04 |
| XLOC_006374 | ENSBTAG00000042477 | 0.89 | 1.10E-04 |
| XLOC_006374 | U6 | 0.89 | 1.10E-04 |
| XLOC_006374 | KIR3DL1 | 0.89 | 1.10E-04 |
| XLOC_000293 | ENSBTAG00000042498 | 0.89 | 1.14E-04 |
| XLOC_000293 | BPIFB1 | 0.89 | 1.14E-04 |
| XLOC_000293 | KNCN | 0.89 | 1.14E-04 |
| XLOC_000293 | ENSBTAG00000048419 | 0.89 | 1.14E-04 |
| XLOC_000293 | ENSBTAG00000048831 | 0.89 | 1.14E-04 |
| XLOC_000293 | FUT9 | 0.89 | 1.14E-04 |
| XLOC_000293 | ENSBTAG00000042477 | 0.89 | 1.14E-04 |
| XLOC_000293 | U6 | 0.89 | 1.14E-04 |
| XLOC_000293 | KIR3DL1 | 0.89 | 1.14E-04 |
| XLOC_002835 | 7SK | 0.88 | 1.62E-04 |
| XLOC_010130 | 7SK | 0.88 | 1.62E-04 |
| XLOC_018904 | 7SK | 0.88 | 1.62E-04 |
| XLOC_023340 | 7SK | 0.88 | 1.62E-04 |
| XLOC_023830 | 7SK | 0.88 | 1.62E-04 |
| XLOC_024584 | 7SK | 0.88 | 1.62E-04 |
| XLOC_031565 | 7SK | 0.88 | 1.62E-04 |
| XLOC_042004 | 7SK | 0.88 | 1.62E-04 |
| XLOC_013169 | 7SK | 0.88 | 1.62E-04 |
| XLOC_039169 | 7SK | 0.88 | 1.62E-04 |
| XLOC_000383 | 7SK | 0.88 | 1.62E-04 |
| XLOC_000438 | 7SK | 0.88 | 1.62E-04 |
| XLOC_029777 | 7SK | 0.88 | 1.62E-04 |
| XLOC_038031 | 7SK | 0.88 | 1.62E-04 |
| XLOC_042632 | 7SK | 0.88 | 1.62E-04 |
| XLOC_041515 | 7SK | 0.88 | 1.62E-04 |
| XLOC_007102 | bta-mir-2285cu | 0.87 | 2.17E-04 |
| XLOC_044640 | ENSBTAG00000022373 | 0.83 | 9.75E-04 |
| XLOC_044640 | ENSBTAG00000049986 | 0.83 | 9.75E-04 |
| XLOC_036173 | ENSBTAG00000042498 | 0.83 | 9.94E-04 |
| XLOC_036173 | BPIFB1 | 0.83 | 9.94E-04 |
| XLOC_036173 | KNCN | 0.83 | 9.94E-04 |
| XLOC_036173 | ENSBTAG00000048419 | 0.83 | 9.94E-04 |
| XLOC_036173 | ENSBTAG00000048831 | 0.83 | 9.94E-04 |
| XLOC_036173 | FUT9 | 0.83 | 9.94E-04 |
| XLOC_036173 | ENSBTAG00000042477 | 0.83 | 9.94E-04 |
| XLOC_036173 | U6 | 0.83 | 9.94E-04 |
| XLOC_036173 | KIR3DL1 | 0.83 | 9.94E-04 |
| XLOC_038968 | ENSBTAG00000022373 | 0.83 | 1.01E-03 |
| XLOC_038968 | ENSBTAG00000049986 | 0.83 | 1.01E-03 |
| XLOC_006273 | bta-mir-2285cu | 0.82 | 1.34E-03 |
| XLOC_003414 | bta-mir-2285cu | 0.82 | 1.40E-03 |
| XLOC_009264 | ENSBTAG00000042498 | 0.82 | 1.41E-03 |
| XLOC_009264 | BPIFB1 | 0.82 | 1.41E-03 |
| XLOC_009264 | KNCN | 0.82 | 1.41E-03 |
| XLOC_009264 | ENSBTAG00000048419 | 0.82 | 1.41E-03 |
| XLOC_009264 | ENSBTAG00000048831 | 0.82 | 1.41E-03 |
| XLOC_009264 | FUT9 | 0.82 | 1.41E-03 |
| XLOC_009264 | ENSBTAG00000042477 | 0.82 | 1.41E-03 |
| XLOC_009264 | U6 | 0.82 | 1.41E-03 |
| XLOC_009264 | KIR3DL1 | 0.82 | 1.41E-03 |
| XLOC_006374 | bta-mir-2285cu | 0.81 | 2.01E-03 |
| XLOC_000293 | bta-mir-2285cu | 0.81 | 2.03E-03 |
| XLOC_010130 | bta-mir-2285cu | 0.79 | 2.78E-03 |
| XLOC_018904 | bta-mir-2285cu | 0.79 | 2.78E-03 |
| XLOC_023340 | bta-mir-2285cu | 0.79 | 2.78E-03 |
| XLOC_023830 | bta-mir-2285cu | 0.79 | 2.78E-03 |
| XLOC_024584 | bta-mir-2285cu | 0.79 | 2.78E-03 |
| XLOC_031565 | bta-mir-2285cu | 0.79 | 2.78E-03 |
| XLOC_042004 | bta-mir-2285cu | 0.79 | 2.78E-03 |
| XLOC_013169 | bta-mir-2285cu | 0.79 | 2.78E-03 |
| XLOC_039169 | bta-mir-2285cu | 0.79 | 2.78E-03 |
| XLOC_000383 | bta-mir-2285cu | 0.79 | 2.78E-03 |
| XLOC_000438 | bta-mir-2285cu | 0.79 | 2.78E-03 |
| XLOC_029777 | bta-mir-2285cu | 0.79 | 2.78E-03 |
| XLOC_038031 | bta-mir-2285cu | 0.79 | 2.78E-03 |
| XLOC_042632 | bta-mir-2285cu | 0.79 | 2.78E-03 |
| XLOC_041515 | bta-mir-2285cu | 0.79 | 2.78E-03 |
| XLOC_029340 | 7SK | 0.79 | 2.78E-03 |
| XLOC_003414 | ENSBTAG00000053420 | 0.79 | 2.80E-03 |
| XLOC_029340 | bta-mir-2285cu | 0.79 | 3.33E-03 |
| XLOC_009264 | bta-mir-2285cu | 0.78 | 4.07E-03 |
| XLOC_001548 | ENSBTAG00000053420 | 0.76 | 6.02E-03 |
| XLOC_006918 | 7SK | 0.76 | 6.16E-03 |
| XLOC_036173 | ENSBTAG00000053420 | 0.75 | 7.62E-03 |
| XLOC_005470 | RGS16 | -0.75 | 7.26E-03 |
| XLOC_007102 | RGS16 | -0.76 | 6.67E-03 |

*Table S13: Genes with identified Cis eQTLs in PBL samples and the number of cis eQTLs identified for each gene.*

| Gene stable ID | Gene name | Number of cis eQTLs |
| --- | --- | --- |
| *ENSBTAG00000013802* | *DAB1* | 202 |
| *ENSBTAG00000003774* | *C8A* | 198 |
| *ENSBTAG00000007217* | *TMEM94* | 185 |
| *ENSBTAG00000017704* | *ABCG2* | 101 |
| *ENSBTAG00000008032* | *ACTR3B* | 75 |
| *ENSBTAG00000014302* | *TOMM70* | 44 |
| *ENSBTAG00000001008* | *PRF1* | 38 |
| *ENSBTAG00000026836* | *ABI3BP* | 22 |
| *ENSBTAG00000016363* | *TFG* | 3 |
| *ENSBTAG00000004742* | *RUNX1* | 3 |
| *ENSBTAG00000017811* | *SLC39A9* | 2 |
| *ENSBTAG00000023384* | *CBR1* | 2 |
| *ENSBTAG00000003484* | *CZIB* | 1 |
| *ENSBTAG00000008576* | *PLEKHD1* | 1 |
| *ENSBTAG00000013961* | *MYSM1* | 1 |
| *ENSBTAG00000001998* | *ST6GALNAC1* | 1 |

*Table S14: Genes with identified cis eQTLs in foot tissue samples and the number of cis acting SNPs identified for each gene.*

| Gene stable ID | Gene name | Number of cis eQTLs |
| --- | --- | --- |
| *ENSBTAG00000013802* | *DAB1* | 496 |
| *ENSBTAG00000030913* | *MX1* | 221 |
| *ENSBTAG00000021253* | *PRDM15* | 121 |
| *ENSBTAG00000024195* | *LDLRAD1* | 112 |
| *ENSBTAG00000003484* | *CZIB* | 111 |
| *ENSBTAG00000016363* | *TFG* | 101 |
| *ENSBTAG00000006625* | *NDC1* | 91 |
| *ENSBTAG00000000202* | *SLC25A19* | 85 |
| *ENSBTAG00000046447* | *Novel cattle gene* | 69 |
| *ENSBTAG00000052302* | *Novel cattle gene* | 55 |
| *ENSBTAG00000010758* | *SMIM5* | 54 |
| *ENSBTAG00000021276* | *TFF3* | 31 |
| *ENSBTAG00000000736* | *LRP8* | 17 |
| *ENSBTAG00000047101* | *CCDC177* | 17 |
| *ENSBTAG00000009002* | *Novel cattle gene* | 12 |
| *ENSBTAG00000021582* | *NCAPG* | 9 |
| *ENSBTAG00000003857* | *SUSD6* | 7 |
| *ENSBTAG00000043015* | *U6* | 6 |
| *ENSBTAG00000053000* | *Novel cattle gene* | 4 |
| *ENSBTAG00000011973* | *DCAF16* | 3 |
| *ENSBTAG00000021259* | *C2CD2* | 2 |
| *ENSBTAG00000019198* | *LRRC42* | 2 |
| *ENSBTAG00000013321* | *Novel cattle gene* | 1 |
| *ENSBTAG00000026836* | *ABI3BP* | 1 |
| *ENSBTAG00000016932* | *SENP7* | 1 |
| *ENSBTAG00000000394* | *BACE2* | 1 |
| *ENSBTAG00000009132* | *TMPRSS2* | 1 |
| *ENSBTAG00000030814* | *TFF2* | 1 |
| *ENSBTAG00000004742* | *RUNX1* | 1 |
| *ENSBTAG00000000470* | *IBSP* | 1 |
| *ENSBTAG00000011596* | *SRSF5* | 1 |
| *ENSBTAG00000044273* | *U6* | 1 |
| *ENSBTAG00000016243* | *RBL2* | 1 |
| *ENSBTAG00000022006* | *TRIM65* | 1 |
| *ENSBTAG00000011713* | *Novel cattle gene* | 1 |
| *ENSBTAG00000007217* | *TMEM94* | 1 |
| *ENSBTAG00000021497* | *CDH23* | 1 |
| *ENSBTAG00000010888* | *VSIR* | 1 |

*Table S15: Genes identified with differentially methylated bases that were also identified as differentially expressed by RNA-seq analysis, detailing the number of differentially methylated bases (DM), the distance of each differentially methylated base to the gene’s transcription start site (TSS) and the percentage difference in methylation in CHDL samples compared to the controls.*

| **ID** | **Gene name** | **No. DM bases** | **Distance to TSS (bp)** | **MethDiff (%)** |
| --- | --- | --- | --- | --- |
| *ENSBTAG00000007268* | *F13A1* | 9 | 21667, 105784, -29868, -26780, 38775, 13222, 24116, -5766, -99 | 31.79, 30.23, 26.67, -32.19, -36.47, -37.70, -43.24, -48.12, -59.49, -73.90 |
| *ENSBTAG00000025260* | *WAP four-disulfide core domain protein 18-like* | 2 | 14909, 14818 | 42.11, 42.65 |
| *ENSBTAG00000019297* | *GFRA1* | 2 | 437785, 327939 | -43.89, 26.71 |
| *ENSBTAG00000011182* | *PDLIM1* | 1 | 9490 | -53.21 |
| *ENSBTAG00000007153* | *C1QA* | 1 | -751 | -28.11 |

* *The first gene (ENSBTAG00000007268*) *was differentially expressed only in the foot tissue sample, the rest in PBL samples.*


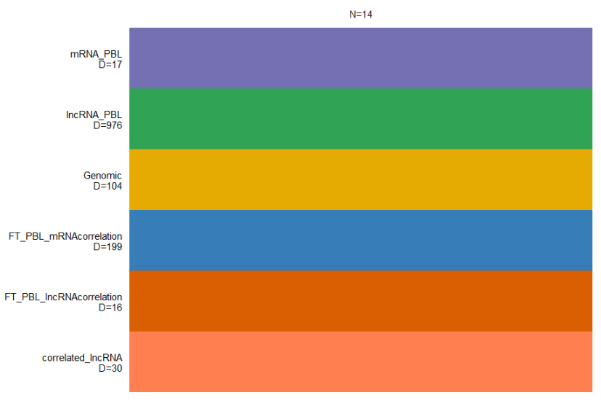


PBL analysis


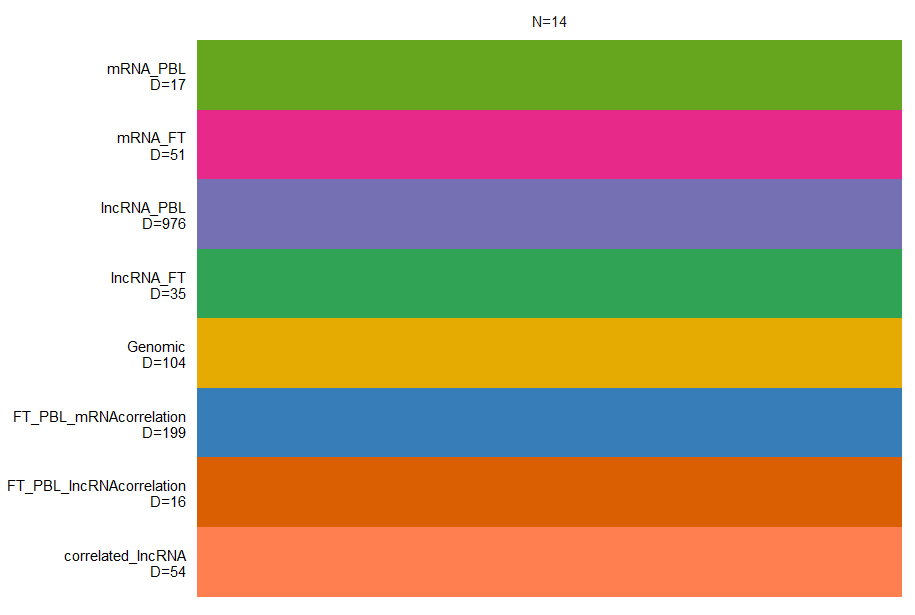


Combined analysis

Foot tissue analysis


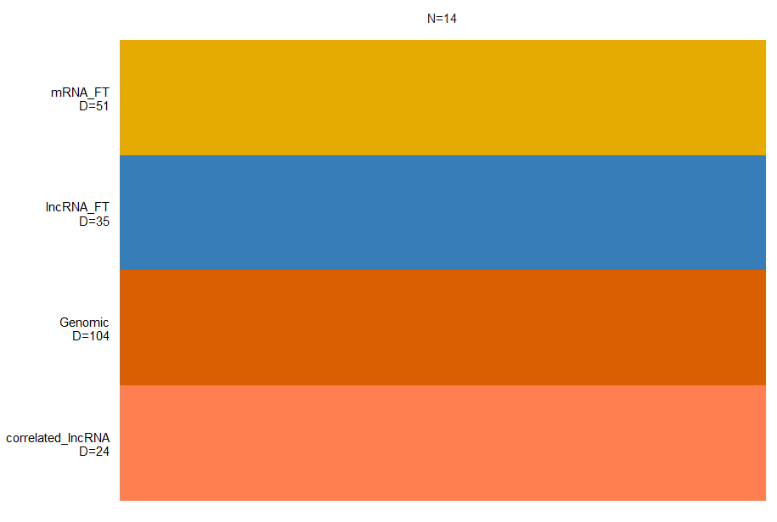


*Figure S1: MOFA model figures indicating the input data for the foot tissue, PBL and combined multi-omic analyses. The distribution of input data indicating the number of input data points for all of the 14 samples for each omic data input*

A)

B)


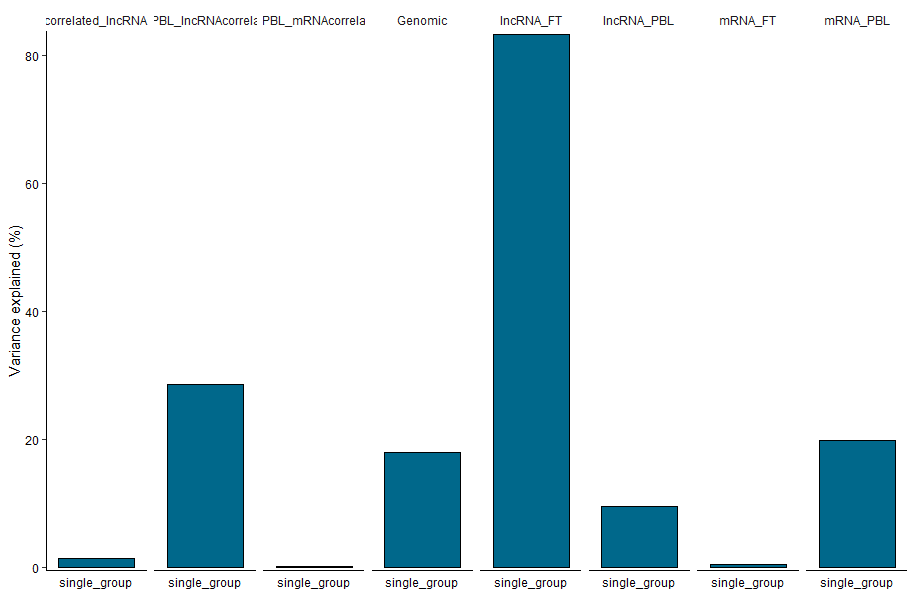

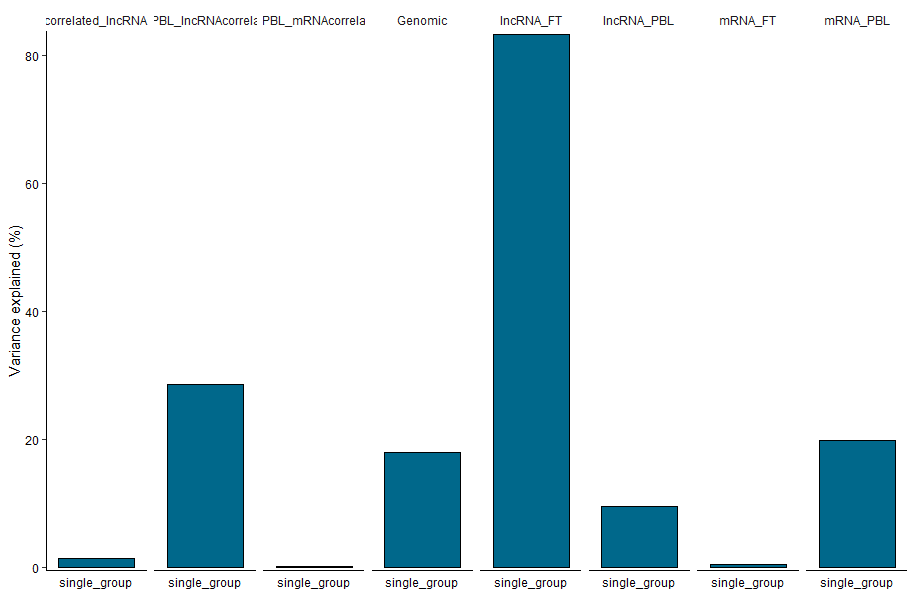

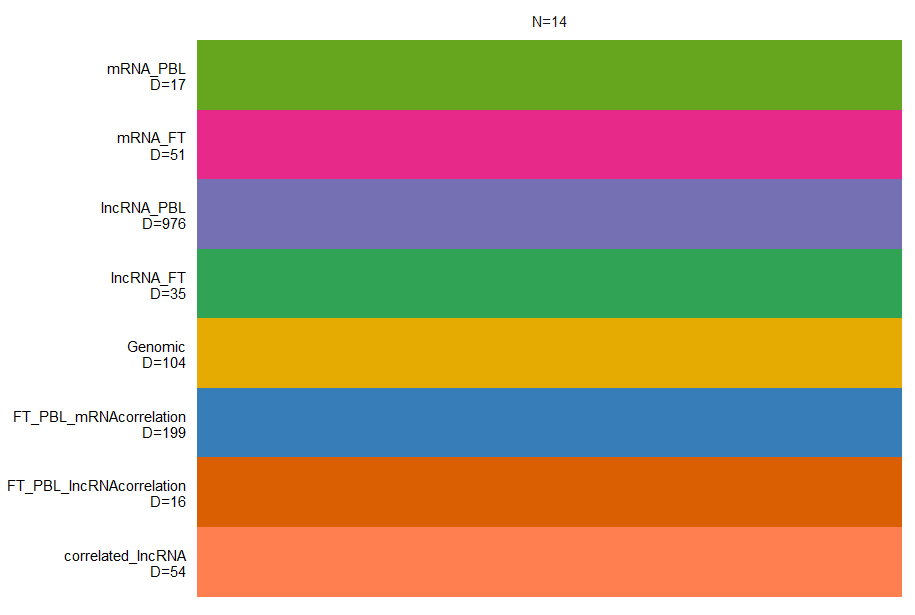

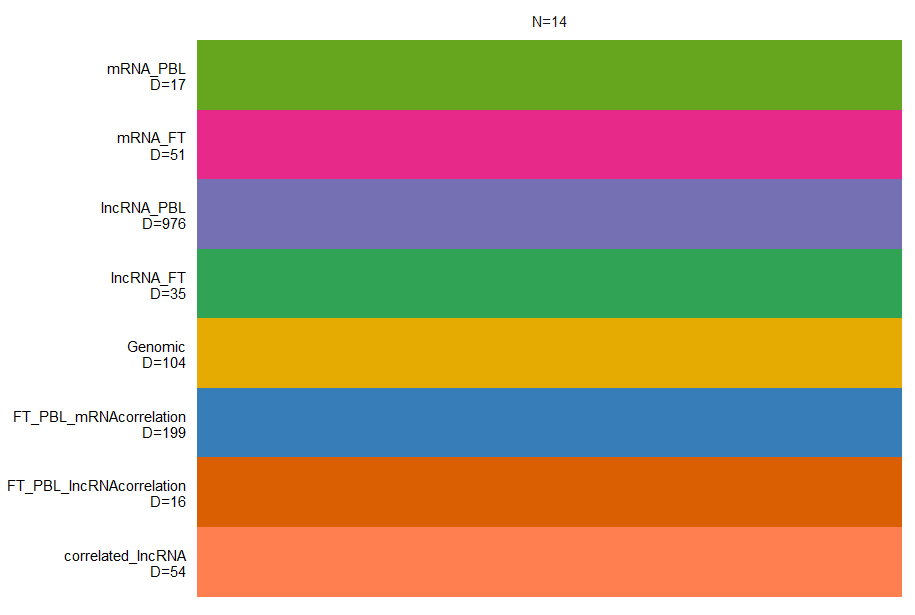

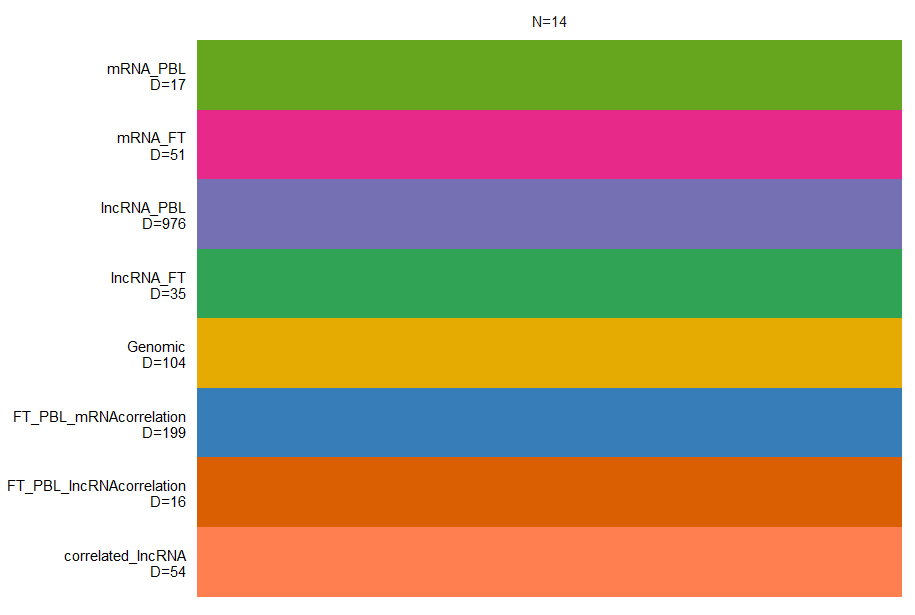

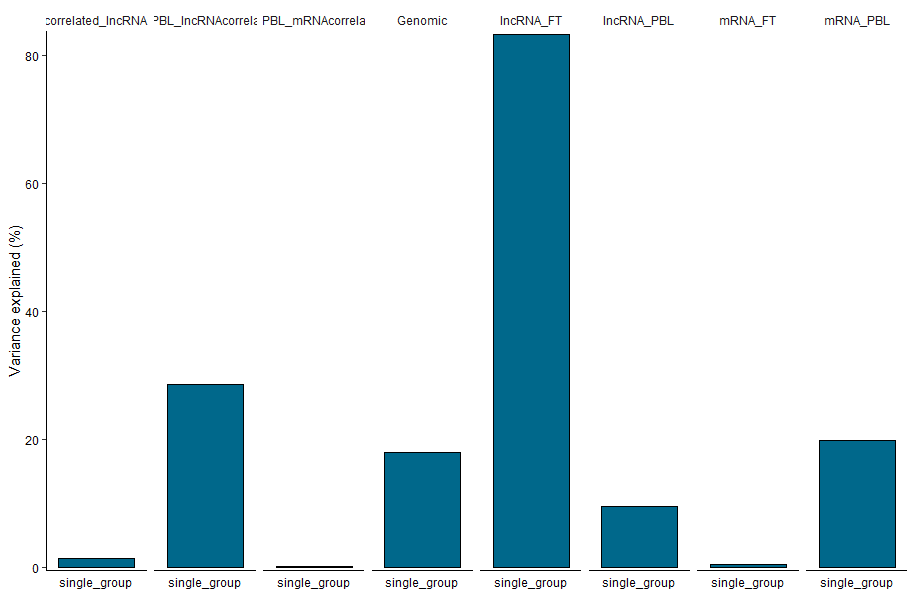

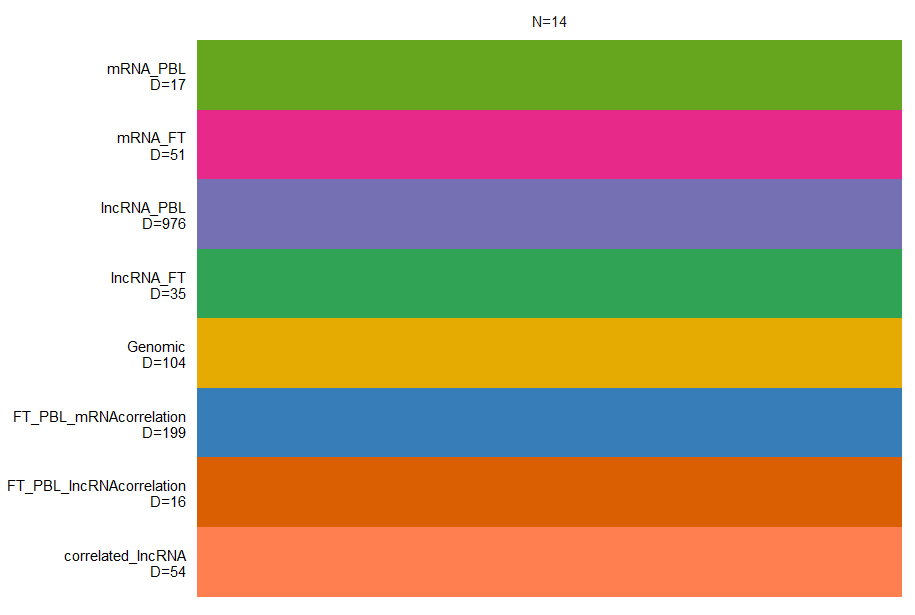

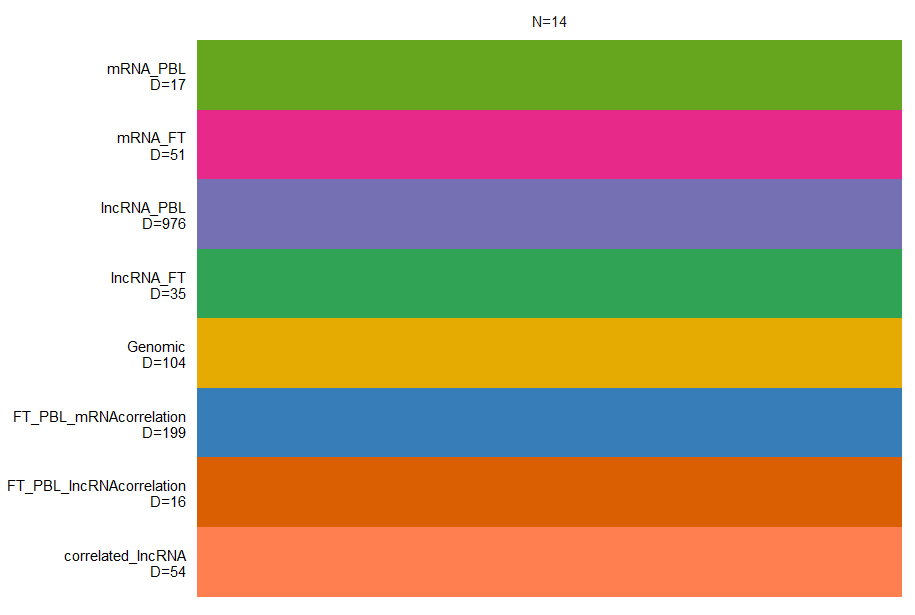

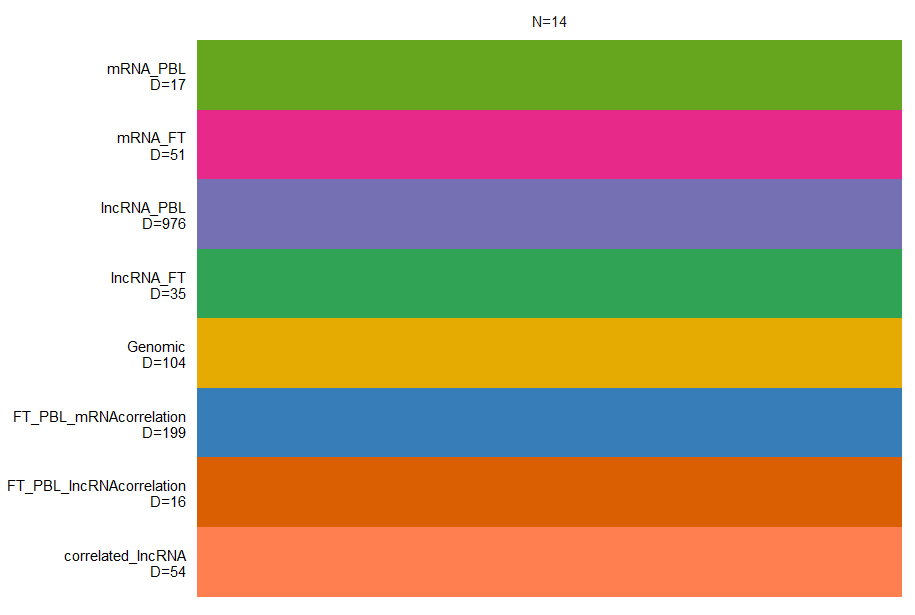

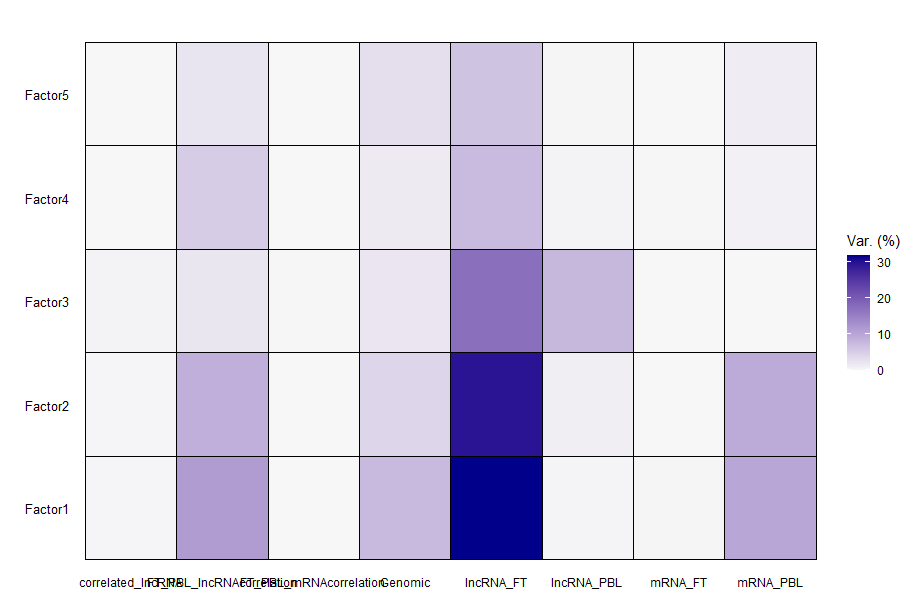

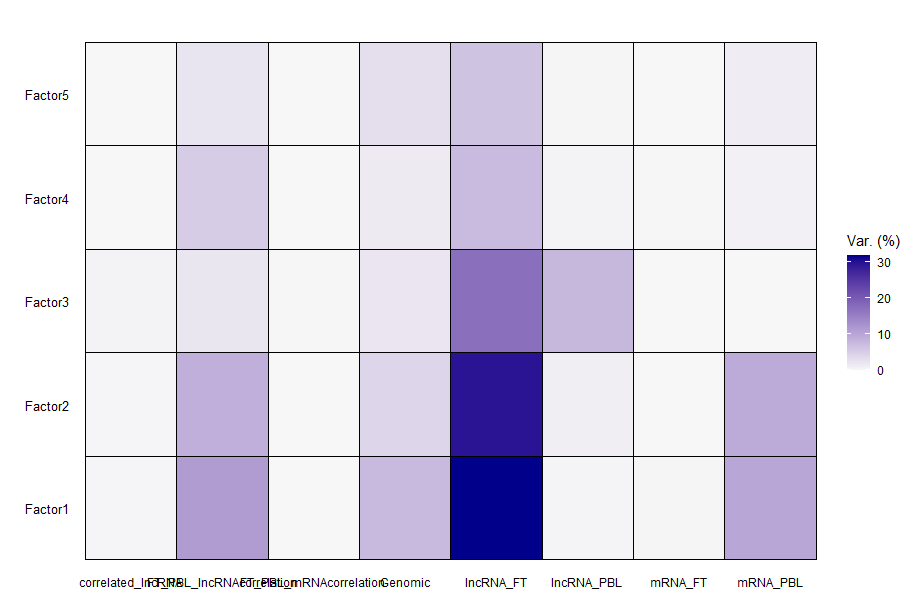

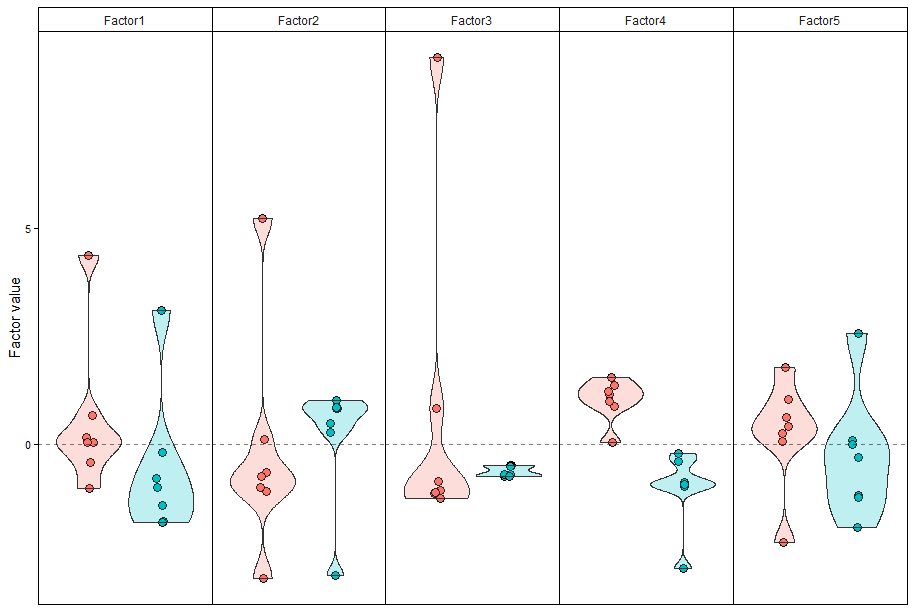

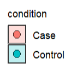


C)

*Figure S2: MOFA model figures indicating the input data for the foot tissue and PBL multi-omic analysis. A) A heatmap distribution of the percentage of variance explained by each omic data input and representative MOFA factor. C) Bar plot distribution of the percentage variation explained by each omic data input and D) violin plot of factor values for each sample separated by CHDL case or control label based on animal phenotype.*

Table S16: Primer sequences used for RT-qPCR validation of identified differentially expressed genes, detailed is the primer sequence (5’ to 3’) and the target gene ID. Forward and reverse primer pairs are indicated by _F or _R after the gene ID.

| Primer sequence (5' to 3') | Primer name |  | Primer sequence (5' to 3') | Primer name |
| --- | --- | --- | --- | --- |
| GCACAAGGATGGTACTGCCT | ENSBTAG00000046158_F |  | GTGTTCCAGGAGTTCTCGCA | ENSBTAG00000019349_R |
| CAGTGAAACAGTGTGCAGCC | ENSBTAG00000046158_R |  | CCTAGCTTTTCTGGGCAGCT | ENSBTAG00000014713_F |
| CCAACCAGGGTCTCATGCAT | ENSBTAG00000018137_F |  | TTTCAGTGGTTTGCTGGGGT | ENSBTAG00000014713_R |
| AGTGCCTTGGTGTAGACGTG | ENSBTAG00000018137_R |  | ATCCATCTGTGCCAACCCAG | ENSBTAG00000010155_F |
| TCCGCCCTTCCAGTTAAACC | ENSBTAG00000005260_F |  | CTTTCATTCGGGCCAGGACT | ENSBTAG00000010155_R |
| ATCAGTGGTTTCAGCGTCGT | ENSBTAG00000005260_R |  | TCAATGCCAAGGACGACGAA | ENSBTAG00000007268_F |
| GCAACGAACACATGGCTGTT | ENSBTAG00000019669_F |  | TGGCATCATTGTCATGGGCT | ENSBTAG00000007268_R |
| TCACTTCAACACGACCGGAG | ENSBTAG00000019669_R |  | GACAACTGGAGAGGACTGGC | ENSBTAG00000013578_F |
| CCTGTTGTGGTGGTGGCTAT | ENSBTAG00000037634_F |  | ACATCCTGAGGGCCTCATCT | ENSBTAG00000013578_R |
| CCTTCGTGTGAGACTGCACT | ENSBTAG00000037634_R |  | AACACAGCTTCCCAACACCA | ENSBTAG00000054927_F |
| CAGAGCCTGCAGGGAAATGA | ENSBTAG00000019297_F |  | GCAGTTGTCACAGCAGGTTG | ENSBTAG00000054927_R |
| CCGGTACTTCTTGCAGGTGT | ENSBTAG00000019297_R |  | AGCTGTCCTGTGAACTCTGC | ENSBTAG00000054974_F |
| ACTGTGGCACCAACCTGAAA | ENSBTAG00000011182_F |  | ACAAAGGTGGTGGCGATGAT | ENSBTAG00000054974_R |
| TGGGGAACACTGTGATCACG | ENSBTAG00000011182_R |  | GCCGACAGATGCTTCAGTCT | ENSBTAG00000049220_F |
| CCATCTTCGTTCTGGTGGCT | ENSBTAG00000025260_F |  | CGTCTCATTCAGGTGGCTCA | ENSBTAG00000049220_R |
| CGGAGAATCTTTGGGCACCT | ENSBTAG00000025260_R |  | TCGTTGTCATTGGGCACGTA | ENSBTAG00000053198_F |
| CTCTACTGGAGATGCCGCTG | ENSBTAG00000038461_F |  | GCAGCCTCCTTCTCGAACTT | ENSBTAG00000053198_R |
| GCAGTTCGTTTCGTTTGGCT | ENSBTAG00000038461_R |  | TCCTGGAGCAGCAGAACAAG | ENSBTAG00000054136_F |
| ATCTCTGCTCTGCCCTACCA | ENSBTAG00000007153_F |  | CAGCGTCTCGATGTAGCCAT | ENSBTAG00000054136_R |
| TTCAGGCTCAGCAGATGTGG | ENSBTAG00000007153_R |  | ACTCAGAGGTACCCGATGCT | ENSBTAG00000038497_F |
| CAACCCTGCTTTGGTGCTTC | ENSBTAG00000002928_F |  | GTGGCCGTCTCCCATAAACA | ENSBTAG00000038497_R |
| ATTTGTGGTTGCAGCTGCTG | ENSBTAG00000002928_R |  | TCCTGGAGCAGCAGAACAAG | ENSBTAG00000052798_F |
| GGGAATTCTGGAGGCAGCTT | ENSBTAG00000019741_F |  | CAGCGTCTCGATGTAGCCAT | ENSBTAG00000052798_R |
| TGACGGTCTCTGCAAGAACC | ENSBTAG00000019741_R |  | GTGTTTGTTTTGGCAGCACA | ENSBTAG00000042411_F |
| TCATCGCCTTCTACATCGCC | ENSBTAG00000019349_F |  | AGGGAACACTTCACAAATTGCA | ENSBTAG00000042411_R |
