# Supplementary material for: Multi-omics data integration towards sustainable bovine production, health and welfare: the case of painful foot lesions
Source: Research Square preprint supplement (doi:10.21203/rs.3.rs-6000979/v1), 2025-03-26
Supplement: Supplementary file 3 [file f3bbe0f2859f13468c28bc73.xlsx]

## Sheet: Description
Sheet	Description
S1-MOFA-FT	MOFA assigned weights for each feature in the significant factor in the Foot tissue MOFA model.
S2-MOFA-PBL	MOFA assigned weights for each feature in the significant factor in the PBL MOFA model.
S3-MOFA-Combined	MOFA assigned weights for each feature in the significant factor in the Foot tissue and PBL combined MOFA model.

## Sheet: S1-MOFA-FT
feature	factor	value	view
ENSBTAT00000036603	Factor2	682.321	mRNA_FT
ENSBTAT00000006167	Factor2	418.042	mRNA_FT
ENSBTAT00000075123	Factor2	418.042	mRNA_FT
ENSBTAT00000076334	Factor2	87.4001	mRNA_FT
ENSBTAT00000009800	Factor2	34.7561	mRNA_FT
ENSBTAT00000078697	Factor2	34.7561	mRNA_FT
ENSBTAT00000079086	Factor2	32.6327	mRNA_FT
ENSBTAT00000009559	Factor2	32.6327	mRNA_FT
ENSBTAT00000081091	Factor2	29.1768	mRNA_FT
ENSBTAT00000024880	Factor2	29.1768	mRNA_FT
ENSBTAT00000040084	Factor2	25.3648	mRNA_FT
ENSBTAT00000067039	Factor2	25.3648	mRNA_FT
ENSBTAT00000009415	Factor2	24.2673	mRNA_FT
ENSBTAT00000040146	Factor2	24.2673	mRNA_FT
ENSBTAT00000005642	Factor2	18.6901	mRNA_FT
ENSBTAT00000026215	Factor2	15.7299	mRNA_FT
ENSBTAT00000084624	Factor2	15.7299	mRNA_FT
ENSBTAT00000047589	Factor2	11.6401	mRNA_FT
ENSBTAT00000081763	Factor2	11.6401	mRNA_FT
ENSBTAT00000075931	Factor2	11.6401	mRNA_FT
ENSBTAT00000006929	Factor2	11.6401	mRNA_FT
ENSBTAT00000067324	Factor2	9.92796	mRNA_FT
ENSBTAT00000079639	Factor2	9.92796	mRNA_FT
ENSBTAT00000072340	Factor2	9.92796	mRNA_FT
ENSBTAT00000083420	Factor2	9.92796	mRNA_FT
ENSBTAT00000055332	Factor2	9.92796	mRNA_FT
ENSBTAT00000085326	Factor2	9.92796	mRNA_FT
ENSBTAT00000076269	Factor2	9.92796	mRNA_FT
ENSBTAT00000080343	Factor2	9.92796	mRNA_FT
ENSBTAT00000082005	Factor2	9.92796	mRNA_FT
ENSBTAT00000037743	Factor2	9.92796	mRNA_FT
ENSBTAT00000072365	Factor2	8.10407	mRNA_FT
ENSBTAT00000026308	Factor2	7.74115	mRNA_FT
ENSBTAT00000031134	Factor2	6.32591	mRNA_FT
ENSBTAT00000084648	Factor2	6.32591	mRNA_FT
ENSBTAT00000054358	Factor2	6.32591	mRNA_FT
ENSBTAT00000056121	Factor2	6.32591	mRNA_FT
ENSBTAT00000072692	Factor2	5.7215	mRNA_FT
ENSBTAT00000018054	Factor2	5.7215	mRNA_FT
ENSBTAT00000013399	Factor2	5.146	mRNA_FT
ENSBTAT00000086145	Factor2	0.377028	mRNA_FT
ENSBTAT00000084234	Factor2	0.25161	mRNA_FT
XLOC_044640	Factor2	0.184581	correlated_lncRNA
TCONS_00075364	Factor2	0.143542	lncRNA_FT
XLOC_038968	Factor2	0.142521	correlated_lncRNA
BovChr5Pos87473596	Factor2	0.0181355	Genomic
BovChr5Pos88182902	Factor2	0.0175668	Genomic
BovChr11Pos46350640	Factor2	0.0159986	Genomic
BovChr28Pos24217547	Factor2	0.0128386	Genomic
BovChr8Pos37458257	Factor2	0.0124009	Genomic
BovChr3Pos88912286	Factor2	0.0112353	Genomic
BovChr1Pos152960777	Factor2	0.0107419	Genomic
BovChr27Pos23369775	Factor2	0.00958949	Genomic
BovChr18Pos57151314	Factor2	0.0086789	Genomic
BovChr27Pos38172660	Factor2	0.00865277	Genomic
BovChr5Pos118053957	Factor2	0.00812933	Genomic
BovChr28Pos42578721	Factor2	0.00795934	Genomic
BovChr15Pos9454207	Factor2	0.00789521	Genomic
BovChr18Pos56124130	Factor2	0.00774583	Genomic
BovChr5Pos115916818	Factor2	0.00764637	Genomic
BovChr4Pos52315044	Factor2	0.00758487	Genomic
BovChr8Pos36002556	Factor2	0.00734366	Genomic
BovChr5Pos116526173	Factor2	0.00702647	Genomic
BovChr5Pos87192767	Factor2	0.00700709	Genomic
BovChr28Pos27459868	Factor2	0.00697259	Genomic
BovChr5Pos87846351	Factor2	0.00655798	Genomic
BovChr10Pos81223782	Factor2	0.00644008	Genomic
BovChr3Pos92637901	Factor2	0.00609743	Genomic
BovChr28Pos27400738	Factor2	0.00597694	Genomic
BovChr15Pos5127591	Factor2	0.00502217	Genomic
BovChr5Pos88079689	Factor2	0.00405422	Genomic
BovChr8Pos36246265	Factor2	0.00398392	Genomic
BovChr1Pos147338727	Factor2	0.0039398	Genomic
BovChr16Pos26388857	Factor2	0.00387623	Genomic
BovChr8Pos35438545	Factor2	0.00345008	Genomic
BovChr18Pos33388109	Factor2	0.00330367	Genomic
BovChr8Pos71492939	Factor2	0.00322664	Genomic
BovChr3Pos89098449	Factor2	0.0031073	Genomic
BovChr3Pos89365301	Factor2	0.00309196	Genomic
BovChr23Pos44070630	Factor2	0.00305339	Genomic
BovChr18Pos32277796	Factor2	0.0027889	Genomic
BovChr15Pos7037828	Factor2	0.0027756	Genomic
BovChr1Pos147241898	Factor2	0.00272175	Genomic
BovChr3Pos88991871	Factor2	0.00222535	Genomic
BovChr3Pos89181812	Factor2	0.0022078	Genomic
BovChr18Pos61330975	Factor2	0.0019456	Genomic
BovChr10Pos61837266	Factor2	0.00170552	Genomic
BovChr3Pos92418182	Factor2	0.00106986	Genomic
BovChr17Pos46524672	Factor2	0.000941132	Genomic
BovChr1Pos141793240	Factor2	0.0007628	Genomic
BovChr10Pos62442084	Factor2	0.00076172	Genomic
BovChr1Pos140713996	Factor2	0.000680848	Genomic
BovChr18Pos57682137	Factor2	0.000588867	Genomic
BovChr3Pos87458490	Factor2	0.000432474	Genomic
BovChr3Pos91549234	Factor2	0.000432474	Genomic
BovChr15Pos5234380	Factor2	0.000297958	Genomic
BovChr1Pos45105866	Factor2	0.000203757	Genomic
BovChr3Pos92302468	Factor2	-0.000432474	Genomic
BovChr17Pos58946521	Factor2	-0.000775428	Genomic
BovChr28Pos30633568	Factor2	-0.00085421	Genomic
BovChr1Pos147295445	Factor2	-0.00087271	Genomic
BovChr3Pos92431268	Factor2	-0.00106986	Genomic
BovChr3Pos88821997	Factor2	-0.00111597	Genomic
BovChr1Pos141365527	Factor2	-0.00137364	Genomic
BovChr1Pos49415050	Factor2	-0.00153347	Genomic
BovChr5Pos89051206	Factor2	-0.0016916	Genomic
BovChr18Pos58716448	Factor2	-0.00180085	Genomic
BovChr8Pos60881902	Factor2	-0.00195979	Genomic
BovChr5Pos41084896	Factor2	-0.00242823	Genomic
BovChr17Pos46005257	Factor2	-0.00253944	Genomic
BovChr1Pos146497300	Factor2	-0.00272485	Genomic
BovChr10Pos81229490	Factor2	-0.00275639	Genomic
BovChr14Pos78489957	Factor2	-0.00332458	Genomic
BovChr17Pos49107623	Factor2	-0.00373455	Genomic
BovChr3Pos34903364	Factor2	-0.0038591	Genomic
BovChr25Pos1825647	Factor2	-0.00436887	Genomic
BovChr14Pos78508738	Factor2	-0.00479681	Genomic
BovChr18Pos32192982	Factor2	-0.00504223	Genomic
BovChr21Pos23567453	Factor2	-0.00533476	Genomic
BovChr21Pos23723788	Factor2	-0.00533476	Genomic
BovChr3Pos93668143	Factor2	-0.00542954	Genomic
BovChr3Pos93849644	Factor2	-0.00542954	Genomic
BovChr3Pos93976377	Factor2	-0.00542954	Genomic
BovChr5Pos87262266	Factor2	-0.00563111	Genomic
BovChr5Pos88647267	Factor2	-0.00567949	Genomic
BovChr28Pos26892434	Factor2	-0.00578313	Genomic
BovChr28Pos27160954	Factor2	-0.00615489	Genomic
BovChr10Pos49448554	Factor2	-0.0062331	Genomic
BovChr17Pos46078006	Factor2	-0.00640255	Genomic
BovChr10Pos81113154	Factor2	-0.00644008	Genomic
BovChr27Pos35710124	Factor2	-0.00685165	Genomic
BovChr10Pos61137869	Factor2	-0.0075708	Genomic
BovChr3Pos87056414	Factor2	-0.00862285	Genomic
BovChr14Pos80813248	Factor2	-0.0106617	Genomic
BovChr19Pos41594056	Factor2	-0.0111006	Genomic
BovChr3Pos88966274	Factor2	-0.0112353	Genomic
BovChr3Pos30167683	Factor2	-0.0120931	Genomic
BovChr5Pos38483708	Factor2	-0.0121827	Genomic
BovChr23Pos43909068	Factor2	-0.0130984	Genomic
BovChr10Pos65055281	Factor2	-0.0132031	Genomic
BovChr8Pos87245919	Factor2	-0.0139591	Genomic
BovChr10Pos61162083	Factor2	-0.0140285	Genomic
BovChr10Pos65020001	Factor2	-0.0140285	Genomic
BovChr1Pos59924376	Factor2	-0.0142018	Genomic
BovChr4Pos87598662	Factor2	-0.0150797	Genomic
BovChr5Pos71548472	Factor2	-0.0170489	Genomic
BovChr5Pos87901217	Factor2	-0.0175668	Genomic
BovChr14Pos78522424	Factor2	-0.0191606	Genomic
BovChr3Pos96202292	Factor2	-0.0196974	Genomic
XLOC_006918	Factor2	-0.114436	correlated_lncRNA
TCONS_00013503	Factor2	-0.119122	lncRNA_FT
XLOC_003414	Factor2	-0.125527	correlated_lncRNA
TCONS_00006756	Factor2	-0.127059	lncRNA_FT
TCONS_00040867	Factor2	-0.135388	lncRNA_FT
TCONS_00010622	Factor2	-0.151872	lncRNA_FT
ENSBTAT00000020875	Factor2	-0.158214	mRNA_FT
ENSBTAT00000065561	Factor2	-0.158218	mRNA_FT
XLOC_000383	Factor2	-0.158603	correlated_lncRNA
XLOC_029777	Factor2	-0.158603	correlated_lncRNA
TCONS_00057677	Factor2	-0.158603	lncRNA_FT
TCONS_00000689	Factor2	-0.158603	lncRNA_FT
TCONS_00083411	Factor2	-0.158603	lncRNA_FT
XLOC_007102	Factor2	-0.16421	correlated_lncRNA
TCONS_00013804	Factor2	-0.165897	lncRNA_FT
TCONS_00039272	Factor2	-0.173305	lncRNA_FT
XLOC_002835	Factor2	-0.180516	correlated_lncRNA
ENSBTAT00000010501	Factor2	-0.184583	mRNA_FT
ENSBTAT00000059469	Factor2	-0.184583	mRNA_FT
ENSBTAT00000060362	Factor2	-0.184583	mRNA_FT
ENSBTAT00000081128	Factor2	-0.184583	mRNA_FT
ENSBTAT00000031506	Factor2	-0.184583	mRNA_FT
TCONS_00005559	Factor2	-0.188038	lncRNA_FT
TCONS_00031928	Factor2	-0.193862	lncRNA_FT
TCONS_00010967	Factor2	-0.194306	lncRNA_FT
XLOC_029340	Factor2	-0.196947	correlated_lncRNA
TCONS_00056733	Factor2	-0.197006	lncRNA_FT
XLOC_006273	Factor2	-0.198424	correlated_lncRNA
TCONS_00012161	Factor2	-0.198441	lncRNA_FT
ENSBTAT00000043104	Factor2	-0.210953	mRNA_FT
XLOC_038031	Factor2	-0.21147	correlated_lncRNA
TCONS_00073640	Factor2	-0.21147	lncRNA_FT
XLOC_005470	Factor2	-0.2238	correlated_lncRNA
TCONS_00010621	Factor2	-0.225019	lncRNA_FT
XLOC_000293	Factor2	-0.233773	correlated_lncRNA
TCONS_00000507	Factor2	-0.233854	lncRNA_FT
XLOC_023340	Factor2	-0.237904	correlated_lncRNA
XLOC_023830	Factor2	-0.237904	correlated_lncRNA
TCONS_00044868	Factor2	-0.237904	lncRNA_FT
TCONS_00045857	Factor2	-0.237904	lncRNA_FT
ENSBTAT00000059490	Factor2	-0.263691	mRNA_FT
XLOC_013169	Factor2	-0.264338	correlated_lncRNA
XLOC_039169	Factor2	-0.264338	correlated_lncRNA
TCONS_00036937	Factor2	-0.264338	lncRNA_FT
TCONS_00025071	Factor2	-0.264338	lncRNA_FT
TCONS_00075774	Factor2	-0.264338	lncRNA_FT
XLOC_000438	Factor2	-0.290771	correlated_lncRNA
TCONS_00081481	Factor2	-0.290771	lncRNA_FT
TCONS_00000768	Factor2	-0.290772	lncRNA_FT
XLOC_009264	Factor2	-0.294104	correlated_lncRNA
TCONS_00017888	Factor2	-0.294937	lncRNA_FT
TCONS_00056310	Factor2	-0.317205	lncRNA_FT
TCONS_00067307	Factor2	-0.320581	lncRNA_FT
XLOC_010130	Factor2	-0.370073	correlated_lncRNA
TCONS_00019463	Factor2	-0.370073	lncRNA_FT
XLOC_042004	Factor2	-0.396506	correlated_lncRNA
TCONS_00081264	Factor2	-0.396506	lncRNA_FT
XLOC_024584	Factor2	-0.42294	correlated_lncRNA
TCONS_00040516	Factor2	-0.42294	lncRNA_FT
TCONS_00047365	Factor2	-0.42294	lncRNA_FT
TCONS_00080528	Factor2	-0.423109	lncRNA_FT
TCONS_00036413	Factor2	-0.528675	lncRNA_FT
TCONS_00061238	Factor2	-0.528675	lncRNA_FT
XLOC_018904	Factor2	-0.528675	correlated_lncRNA
XLOC_031565	Factor2	-0.528675	correlated_lncRNA

## Sheet: MOFA-PBL
feature	factor	value	view
ENSBTAT00000035434	Factor4	49.2911	mRNA_PBL
ENSBTAT00000082189	Factor4	38.1518	mRNA_PBL
ENSBTAT00000025774	Factor4	38.1518	mRNA_PBL
ENSBTAT00000003804	Factor4	29.887	mRNA_PBL
ENSBTAT00000087300	Factor4	29.887	mRNA_PBL
ENSBTAT00000019004	Factor4	25.1431	FT_PBL_mRNAcorrelation
ENSBTAT00000064111	Factor4	18.9341	mRNA_PBL
ENSBTAT00000069144	Factor4	14.7566	mRNA_PBL
ENSBTAT00000077014	Factor4	14.7566	mRNA_PBL
ENSBTAT00000053470	Factor4	10.4182	mRNA_PBL
ENSBTAT00000017256	Factor4	9.97123	FT_PBL_mRNAcorrelation
ENSBTAT00000080742	Factor4	9.05561	mRNA_PBL
XLOC_023352	Factor4	8.42075	correlated_lncRNA
XLOC_047940	Factor4	8.3464	correlated_lncRNA
ENSBTAT00000025695	Factor4	7.79766	mRNA_PBL
ENSBTAT00000083411	Factor4	7.79766	mRNA_PBL
ENSBTAT00000085213	Factor4	7.68356	mRNA_PBL
ENSBTAT00000061304	Factor4	6.99798	FT_PBL_mRNAcorrelation
ENSBTAT00000085453	Factor4	6.99798	FT_PBL_mRNAcorrelation
ENSBTAT00000014850	Factor4	6.73892	mRNA_PBL
XLOC_031581	Factor4	6.32925	correlated_lncRNA
ENSBTAT00000004070	Factor4	6.30894	FT_PBL_mRNAcorrelation
XLOC_017868	Factor4	5.72667	correlated_lncRNA
TCONS_00013660	Factor4	5.50038	lncRNA_PBL
ENSBTAT00000069816	Factor4	5.16356	FT_PBL_mRNAcorrelation
ENSBTAT00000053458	Factor4	5.10909	FT_PBL_mRNAcorrelation
TCONS_00065937	Factor4	5.0776	lncRNA_PBL
TCONS_00002262	Factor4	5.05333	lncRNA_PBL
ENSBTAT00000050790	Factor4	5.04237	FT_PBL_mRNAcorrelation
ENSBTAT00000079544	Factor4	4.75234	FT_PBL_mRNAcorrelation
ENSBTAT00000085181	Factor4	4.75234	FT_PBL_mRNAcorrelation
TCONS_00081060	Factor4	4.52424	lncRNA_PBL
TCONS_00051773	Factor4	4.4977	lncRNA_PBL
ENSBTAT00000080303_mRNA_PBL	Factor4	4.48672	mRNA_PBL
ENSBTAT00000083222	Factor4	4.46943	FT_PBL_mRNAcorrelation
ENSBTAT00000022655	Factor4	4.46943	FT_PBL_mRNAcorrelation
ENSBTAT00000073576	Factor4	4.46943	FT_PBL_mRNAcorrelation
XLOC_075685	Factor4	4.44861	correlated_lncRNA
TCONS_00088974	Factor4	4.32274	lncRNA_PBL
TCONS_00141184	Factor4	4.28536	lncRNA_PBL
ENSBTAT00000028899	Factor4	4.20985	FT_PBL_mRNAcorrelation
ENSBTAT00000002039	Factor4	4.04224	FT_PBL_mRNAcorrelation
ENSBTAT00000083724	Factor4	3.98605	FT_PBL_mRNAcorrelation
TCONS_00122989	Factor4	3.94822	lncRNA_PBL
TCONS_00128359	Factor4	3.83795	lncRNA_PBL
ENSBTAT00000052672	Factor4	3.78191	FT_PBL_mRNAcorrelation
TCONS_00039268	Factor4	3.71659	lncRNA_PBL
TCONS_00113279	Factor4	3.69825	lncRNA_PBL
ENSBTAT00000015106	Factor4	3.68472	FT_PBL_mRNAcorrelation
TCONS_00070633	Factor4	3.64368	lncRNA_PBL
TCONS_00049650	Factor4	3.61363	lncRNA_PBL
TCONS_00114460	Factor4	3.5338	lncRNA_PBL
TCONS_00091835	Factor4	3.47994	lncRNA_PBL
TCONS_00034011	Factor4	3.47783	lncRNA_PBL
TCONS_00013623	Factor4	3.47139	lncRNA_PBL
ENSBTAT00000038954	Factor4	3.45868	FT_PBL_mRNAcorrelation
TCONS_00084490	Factor4	3.45793	lncRNA_PBL
TCONS_00051769	Factor4	3.38295	lncRNA_PBL
TCONS_00140039	Factor4	3.35461	lncRNA_PBL
TCONS_00140301	Factor4	3.34745	lncRNA_PBL
XLOC_092715	Factor4	3.33904	correlated_lncRNA
TCONS_00060878	Factor4	3.22776	lncRNA_PBL
TCONS_00010834	Factor4	3.16802	lncRNA_PBL
TCONS_00071825	Factor4	3.16149	lncRNA_PBL
TCONS_00027550	Factor4	3.13035	lncRNA_PBL
TCONS_00013309	Factor4	3.09971	lncRNA_PBL
TCONS_00114073	Factor4	3.05171	lncRNA_PBL
TCONS_00144915	Factor4	3.02763	lncRNA_PBL
TCONS_00100253	Factor4	2.98016	lncRNA_PBL
TCONS_00089687	Factor4	2.97201	lncRNA_PBL
TCONS_00086061	Factor4	2.93864	lncRNA_PBL
TCONS_00072147	Factor4	2.92213	lncRNA_PBL
TCONS_00030136	Factor4	2.91281	lncRNA_PBL
TCONS_00083909	Factor4	2.90991	lncRNA_PBL
TCONS_00083908	Factor4	2.90991	lncRNA_PBL
TCONS_00000008	Factor4	2.87698	FT_PBL_lncRNAcorrelation
TCONS_00124458	Factor4	2.86056	lncRNA_PBL
TCONS_00024048	Factor4	2.85453	lncRNA_PBL
TCONS_00032149	Factor4	2.80262	lncRNA_PBL
TCONS_00037182	Factor4	2.79329	lncRNA_PBL
TCONS_00077887	Factor4	2.77853	lncRNA_PBL
TCONS_00045427	Factor4	2.74873	lncRNA_PBL
TCONS_00122236	Factor4	2.71688	lncRNA_PBL
TCONS_00067705	Factor4	2.71161	lncRNA_PBL
TCONS_00113050	Factor4	2.688	lncRNA_PBL
TCONS_00020762	Factor4	2.68428	lncRNA_PBL
TCONS_00059251	Factor4	2.66244	lncRNA_PBL
TCONS_00057149	Factor4	2.65782	lncRNA_PBL
TCONS_00139113	Factor4	2.6449	lncRNA_PBL
TCONS_00130788	Factor4	2.61434	lncRNA_PBL
TCONS_00129100	Factor4	2.6112	lncRNA_PBL
XLOC_085854	Factor4	2.61054	correlated_lncRNA
TCONS_00027755	Factor4	2.60298	lncRNA_PBL
TCONS_00077360	Factor4	2.5227	lncRNA_PBL
TCONS_00132364	Factor4	2.5148	lncRNA_PBL
TCONS_00034783	Factor4	2.51387	lncRNA_PBL
TCONS_00021816	Factor4	2.50833	lncRNA_PBL
ENSBTAT00000001866	Factor4	2.50301	FT_PBL_mRNAcorrelation
TCONS_00140582	Factor4	2.47498	lncRNA_PBL
ENSBTAT00000026133	Factor4	2.45156	FT_PBL_mRNAcorrelation
TCONS_00053327	Factor4	2.41745	lncRNA_PBL
ENSBTAT00000009775	Factor4	2.41475	FT_PBL_mRNAcorrelation
ENSBTAT00000081861	Factor4	2.41475	FT_PBL_mRNAcorrelation
TCONS_00003214	Factor4	2.38889	lncRNA_PBL
TCONS_00006988	Factor4	2.37981	lncRNA_PBL
TCONS_00080466	Factor4	2.37532	lncRNA_PBL
ENSBTAT00000079043	Factor4	2.36682	FT_PBL_mRNAcorrelation
ENSBTAT00000000588	Factor4	2.36682	FT_PBL_mRNAcorrelation
ENSBTAT00000082979	Factor4	2.36682	FT_PBL_mRNAcorrelation
ENSBTAT00000020875	Factor4	2.36053	FT_PBL_mRNAcorrelation
TCONS_00140110	Factor4	2.35696	lncRNA_PBL
TCONS_00033687	Factor4	2.35247	lncRNA_PBL
TCONS_00038909	Factor4	2.34634	lncRNA_PBL
TCONS_00143465	Factor4	2.34318	lncRNA_PBL
ENSBTAT00000034158	Factor4	2.33949	FT_PBL_mRNAcorrelation
ENSBTAT00000080514	Factor4	2.33949	FT_PBL_mRNAcorrelation
TCONS_00099535	Factor4	2.32809	lncRNA_PBL
XLOC_086595	Factor4	2.26782	correlated_lncRNA
TCONS_00102615	Factor4	2.26614	lncRNA_PBL
TCONS_00044804	Factor4	2.26388	lncRNA_PBL
TCONS_00054079	Factor4	2.26128	lncRNA_PBL
TCONS_00147050	Factor4	2.24835	lncRNA_PBL
TCONS_00053319	Factor4	2.24551	lncRNA_PBL
TCONS_00065998	Factor4	2.239	lncRNA_PBL
TCONS_00013883	Factor4	2.23478	lncRNA_PBL
TCONS_00128888	Factor4	2.23166	lncRNA_PBL
TCONS_00093702	Factor4	2.19522	lncRNA_PBL
TCONS_00022174	Factor4	2.18067	lncRNA_PBL
XLOC_074088	Factor4	2.16192	correlated_lncRNA
TCONS_00066181	Factor4	2.16027	lncRNA_PBL
TCONS_00059054	Factor4	2.15028	lncRNA_PBL
TCONS_00059047	Factor4	2.14672	lncRNA_PBL
TCONS_00059048	Factor4	2.14672	lncRNA_PBL
TCONS_00150250	Factor4	2.13794	lncRNA_PBL
TCONS_00051139	Factor4	2.1268	lncRNA_PBL
TCONS_00123899	Factor4	2.12661	lncRNA_PBL
ENSBTAT00000037226	Factor4	2.11136	FT_PBL_mRNAcorrelation
ENSBTAT00000067520	Factor4	2.11136	FT_PBL_mRNAcorrelation
TCONS_00093294	Factor4	2.1044	lncRNA_PBL
TCONS_00117942	Factor4	2.0972	lncRNA_PBL
TCONS_00117941	Factor4	2.0972	lncRNA_PBL
TCONS_00078300	Factor4	2.08866	lncRNA_PBL
TCONS_00018793	Factor4	2.08431	lncRNA_PBL
TCONS_00087090	Factor4	2.08327	lncRNA_PBL
ENSBTAT00000043345	Factor4	2.08193	FT_PBL_mRNAcorrelation
ENSBTAT00000054181	Factor4	2.07877	FT_PBL_mRNAcorrelation
TCONS_00150361	Factor4	2.07625	lncRNA_PBL
TCONS_00073102	Factor4	2.07274	lncRNA_PBL
TCONS_00129728	Factor4	2.0671	lncRNA_PBL
TCONS_00027075	Factor4	2.04752	lncRNA_PBL
TCONS_00106746	Factor4	2.03769	lncRNA_PBL
TCONS_00135462	Factor4	2.01567	lncRNA_PBL
TCONS_00107705	Factor4	2.0091	lncRNA_PBL
TCONS_00138912	Factor4	2.00865	lncRNA_PBL
TCONS_00028906	Factor4	1.99262	lncRNA_PBL
TCONS_00025817	Factor4	1.98456	lncRNA_PBL
TCONS_00089321	Factor4	1.97936	lncRNA_PBL
TCONS_00037237	Factor4	1.95838	lncRNA_PBL
TCONS_00146063	Factor4	1.95403	lncRNA_PBL
TCONS_00004946	Factor4	1.94705	lncRNA_PBL
TCONS_00091221	Factor4	1.93281	FT_PBL_lncRNAcorrelation
ENSBTAT00000024736	Factor4	1.8975	FT_PBL_mRNAcorrelation
ENSBTAT00000074659	Factor4	1.8975	FT_PBL_mRNAcorrelation
ENSBTAT00000074822	Factor4	1.8975	FT_PBL_mRNAcorrelation
TCONS_00018775	Factor4	1.89668	lncRNA_PBL
TCONS_00077960	Factor4	1.89311	lncRNA_PBL
TCONS_00150759	Factor4	1.89244	lncRNA_PBL
TCONS_00101306	Factor4	1.88979	lncRNA_PBL
ENSBTAT00000024083	Factor4	1.85397	FT_PBL_mRNAcorrelation
TCONS_00026597	Factor4	1.84983	lncRNA_PBL
TCONS_00053947	Factor4	1.81897	lncRNA_PBL
TCONS_00135474	Factor4	1.81333	lncRNA_PBL
TCONS_00102562	Factor4	1.81269	lncRNA_PBL
ENSBTAT00000015436	Factor4	1.80437	FT_PBL_mRNAcorrelation
ENSBTAT00000074459	Factor4	1.80437	FT_PBL_mRNAcorrelation
TCONS_00012329	Factor4	1.78895	lncRNA_PBL
TCONS_00014063	Factor4	1.78847	lncRNA_PBL
TCONS_00084445	Factor4	1.78707	lncRNA_PBL
TCONS_00008672	Factor4	1.77476	lncRNA_PBL
TCONS_00006677	Factor4	1.76803	lncRNA_PBL
TCONS_00110040	Factor4	1.75645	lncRNA_PBL
TCONS_00050643	Factor4	1.75612	lncRNA_PBL
TCONS_00039897	Factor4	1.75585	lncRNA_PBL
TCONS_00047103	Factor4	1.75432	lncRNA_PBL
TCONS_00151839	Factor4	1.74747	lncRNA_PBL
TCONS_00132488	Factor4	1.732	lncRNA_PBL
TCONS_00042366	Factor4	1.70696	lncRNA_PBL
XLOC_068463	Factor4	1.70284	correlated_lncRNA
TCONS_00040181	Factor4	1.68648	lncRNA_PBL
TCONS_00137165	Factor4	1.6848	lncRNA_PBL
TCONS_00046496	Factor4	1.65709	lncRNA_PBL
TCONS_00101873	Factor4	1.64864	lncRNA_PBL
XLOC_067572	Factor4	1.64753	correlated_lncRNA
TCONS_00147011	Factor4	1.64114	lncRNA_PBL
ENSBTAT00000081285	Factor4	1.63857	FT_PBL_mRNAcorrelation
ENSBTAT00000052768	Factor4	1.61568	FT_PBL_mRNAcorrelation
TCONS_00031707	Factor4	1.60526	lncRNA_PBL
TCONS_00161236	Factor4	1.59459	lncRNA_PBL
TCONS_00085324	Factor4	1.58845	lncRNA_PBL
TCONS_00027938	Factor4	1.58711	lncRNA_PBL
TCONS_00029583	Factor4	1.58223	lncRNA_PBL
TCONS_00049289	Factor4	1.57467	lncRNA_PBL
TCONS_00001857	Factor4	1.56357	lncRNA_PBL
TCONS_00115457	Factor4	1.55266	lncRNA_PBL
TCONS_00134577	Factor4	1.54646	lncRNA_PBL
TCONS_00112235	Factor4	1.53914	lncRNA_PBL
XLOC_073790	Factor4	1.52773	correlated_lncRNA
TCONS_00000001	Factor4	1.5182	FT_PBL_lncRNAcorrelation
TCONS_00000555	Factor4	1.515	lncRNA_PBL
TCONS_00107475	Factor4	1.50252	lncRNA_PBL
TCONS_00132503	Factor4	1.49614	lncRNA_PBL
TCONS_00160157	Factor4	1.49588	lncRNA_PBL
TCONS_00042140	Factor4	1.48796	lncRNA_PBL
TCONS_00075341	Factor4	1.46041	lncRNA_PBL
TCONS_00118925	Factor4	1.45688	lncRNA_PBL
XLOC_064125	Factor4	1.41912	correlated_lncRNA
TCONS_00109754	Factor4	1.41798	lncRNA_PBL
ENSBTAT00000079930	Factor4	1.41517	FT_PBL_mRNAcorrelation
TCONS_00128006	Factor4	1.41159	lncRNA_PBL
TCONS_00061446	Factor4	1.40636	lncRNA_PBL
TCONS_00089054	Factor4	1.39853	lncRNA_PBL
TCONS_00109114	Factor4	1.39606	lncRNA_PBL
TCONS_00108063	Factor4	1.38732	lncRNA_PBL
ENSBTAT00000007553	Factor4	1.36825	FT_PBL_mRNAcorrelation
TCONS_00162097	Factor4	1.36494	lncRNA_PBL
TCONS_00150603	Factor4	1.34687	lncRNA_PBL
TCONS_00132701	Factor4	1.33533	lncRNA_PBL
TCONS_00029539	Factor4	1.31563	lncRNA_PBL
TCONS_00025055	Factor4	1.30051	lncRNA_PBL
TCONS_00108200	Factor4	1.29867	lncRNA_PBL
TCONS_00108201	Factor4	1.29867	lncRNA_PBL
ENSBTAT00000062847	Factor4	1.295	FT_PBL_mRNAcorrelation
TCONS_00116533	Factor4	1.28603	lncRNA_PBL
TCONS_00000003	Factor4	1.28166	FT_PBL_lncRNAcorrelation
TCONS_00031674	Factor4	1.27182	lncRNA_PBL
TCONS_00095227	Factor4	1.25391	lncRNA_PBL
TCONS_00099398	Factor4	1.24656	lncRNA_PBL
TCONS_00032212	Factor4	1.24383	lncRNA_PBL
TCONS_00014298	Factor4	1.24306	lncRNA_PBL
TCONS_00115802	Factor4	1.21599	lncRNA_PBL
TCONS_00072208	Factor4	1.21214	lncRNA_PBL
TCONS_00079360	Factor4	1.21201	lncRNA_PBL
TCONS_00124968	Factor4	1.19886	lncRNA_PBL
TCONS_00158419	Factor4	1.19756	lncRNA_PBL
TCONS_00119680	Factor4	1.19643	lncRNA_PBL
TCONS_00114105	Factor4	1.18907	lncRNA_PBL
TCONS_00081779	Factor4	1.18649	lncRNA_PBL
TCONS_00090685	Factor4	1.18451	lncRNA_PBL
TCONS_00061984	Factor4	1.18168	lncRNA_PBL
XLOC_078036	Factor4	1.16955	correlated_lncRNA
TCONS_00072269	Factor4	1.14172	lncRNA_PBL
TCONS_00049340	Factor4	1.1395	lncRNA_PBL
TCONS_00027876	Factor4	1.1241	lncRNA_PBL
TCONS_00150158	Factor4	1.09813	lncRNA_PBL
TCONS_00135115	Factor4	1.08885	lncRNA_PBL
TCONS_00037152	Factor4	1.08794	lncRNA_PBL
TCONS_00092232	Factor4	1.08127	lncRNA_PBL
TCONS_00068475	Factor4	1.08066	lncRNA_PBL
ENSBTAT00000027332	Factor4	1.08015	FT_PBL_mRNAcorrelation
XLOC_023276	Factor4	1.07679	correlated_lncRNA
TCONS_00001235	Factor4	1.07274	lncRNA_PBL
TCONS_00147714	Factor4	1.06907	lncRNA_PBL
TCONS_00107719	Factor4	1.06287	lncRNA_PBL
TCONS_00069833	Factor4	1.05796	lncRNA_PBL
TCONS_00095871	Factor4	1.05713	lncRNA_PBL
ENSBTAT00000056022	Factor4	1.0495	FT_PBL_mRNAcorrelation
TCONS_00061941	Factor4	1.04825	lncRNA_PBL
TCONS_00128139	Factor4	1.0471	lncRNA_PBL
TCONS_00129859	Factor4	1.04165	lncRNA_PBL
TCONS_00000999	Factor4	1.03956	lncRNA_PBL
TCONS_00044240	Factor4	1.03448	lncRNA_PBL
TCONS_00104480	Factor4	1.02504	lncRNA_PBL
TCONS_00002309	Factor4	1.02081	lncRNA_PBL
TCONS_00053339	Factor4	1.02075	lncRNA_PBL
TCONS_00099736	Factor4	1.01684	lncRNA_PBL
TCONS_00031413	Factor4	1.0158	lncRNA_PBL
TCONS_00108415	Factor4	1.01456	lncRNA_PBL
TCONS_00079637	Factor4	1.00875	lncRNA_PBL
ENSBTAT00000066791	Factor4	1.0078	FT_PBL_mRNAcorrelation
TCONS_00089159	Factor4	1.0045	lncRNA_PBL
TCONS_00119777	Factor4	1.00445	lncRNA_PBL
ENSBTAT00000001168	Factor4	0.998849	FT_PBL_mRNAcorrelation
ENSBTAT00000049099	Factor4	0.983284	FT_PBL_mRNAcorrelation
TCONS_00141975	Factor4	0.979021	lncRNA_PBL
TCONS_00025060	Factor4	0.976414	lncRNA_PBL
TCONS_00000857	Factor4	0.968354	lncRNA_PBL
TCONS_00039374	Factor4	0.96698	lncRNA_PBL
TCONS_00020624	Factor4	0.96529	lncRNA_PBL
TCONS_00080994	Factor4	0.961181	lncRNA_PBL
TCONS_00002647	Factor4	0.960577	lncRNA_PBL
ENSBTAT00000064814	Factor4	0.960446	FT_PBL_mRNAcorrelation
TCONS_00011382	Factor4	0.96024	lncRNA_PBL
TCONS_00105872	Factor4	0.958742	lncRNA_PBL
ENSBTAT00000069520	Factor4	0.952536	FT_PBL_mRNAcorrelation
TCONS_00065755	Factor4	0.947759	FT_PBL_lncRNAcorrelation
TCONS_00059399	Factor4	0.947527	lncRNA_PBL
TCONS_00107337	Factor4	0.939553	lncRNA_PBL
ENSBTAT00000073077	Factor4	0.936047	FT_PBL_mRNAcorrelation
TCONS_00135467	Factor4	0.933825	lncRNA_PBL
TCONS_00071488	Factor4	0.920622	lncRNA_PBL
TCONS_00117225	Factor4	0.916619	lncRNA_PBL
ENSBTAT00000079690	Factor4	0.916314	FT_PBL_mRNAcorrelation
ENSBTAT00000083068	Factor4	0.916314	FT_PBL_mRNAcorrelation
TCONS_00069143	Factor4	0.915372	lncRNA_PBL
TCONS_00035527	Factor4	0.907417	lncRNA_PBL
TCONS_00084578	Factor4	0.906423	lncRNA_PBL
TCONS_00058090	Factor4	0.904581	lncRNA_PBL
TCONS_00000106	Factor4	0.902484	lncRNA_PBL
ENSBTAT00000059107	Factor4	0.900636	FT_PBL_mRNAcorrelation
ENSBTAT00000002422	Factor4	0.894266	FT_PBL_mRNAcorrelation
TCONS_00059163	Factor4	0.886051	lncRNA_PBL
TCONS_00106299	Factor4	0.88508	lncRNA_PBL
XLOC_087236	Factor4	0.877766	correlated_lncRNA
TCONS_00020843	Factor4	0.865839	lncRNA_PBL
TCONS_00083637	Factor4	0.861686	lncRNA_PBL
TCONS_00027636	Factor4	0.861129	lncRNA_PBL
TCONS_00030451	Factor4	0.842911	lncRNA_PBL
TCONS_00141409	Factor4	0.838222	lncRNA_PBL
TCONS_00062251	Factor4	0.836287	lncRNA_PBL
TCONS_00011067	Factor4	0.827948	lncRNA_PBL
TCONS_00106361	Factor4	0.825192	lncRNA_PBL
ENSBTAT00000057294	Factor4	0.8227	FT_PBL_mRNAcorrelation
ENSBTAT00000015116	Factor4	0.820707	FT_PBL_mRNAcorrelation
TCONS_00019527	Factor4	0.819524	lncRNA_PBL
TCONS_00073771	Factor4	0.815742	lncRNA_PBL
TCONS_00118033	Factor4	0.814214	lncRNA_PBL
TCONS_00065944	Factor4	0.812952	lncRNA_PBL
ENSBTAT00000010501	Factor4	0.805109	FT_PBL_mRNAcorrelation
TCONS_00147197	Factor4	0.80465	lncRNA_PBL
TCONS_00119760	Factor4	0.789195	lncRNA_PBL
TCONS_00065080	Factor4	0.788263	lncRNA_PBL
TCONS_00028941	Factor4	0.777347	lncRNA_PBL
ENSBTAT00000037479	Factor4	0.776399	FT_PBL_mRNAcorrelation
TCONS_00099383	Factor4	0.773585	lncRNA_PBL
TCONS_00061867	Factor4	0.772155	lncRNA_PBL
TCONS_00077787	Factor4	0.753998	lncRNA_PBL
TCONS_00102403	Factor4	0.752465	lncRNA_PBL
TCONS_00144410	Factor4	0.750049	lncRNA_PBL
TCONS_00014935	Factor4	0.742093	lncRNA_PBL
TCONS_00020772	Factor4	0.741579	lncRNA_PBL
TCONS_00142853	Factor4	0.739722	lncRNA_PBL
TCONS_00079386	Factor4	0.734909	lncRNA_PBL
TCONS_00076481	Factor4	0.730859	lncRNA_PBL
ENSBTAT00000064018	Factor4	0.728119	FT_PBL_mRNAcorrelation
TCONS_00060829	Factor4	0.719786	lncRNA_PBL
TCONS_00094215	Factor4	0.718399	lncRNA_PBL
TCONS_00061097	Factor4	0.70388	lncRNA_PBL
TCONS_00048886	Factor4	0.70252	lncRNA_PBL
TCONS_00044773	Factor4	0.700856	lncRNA_PBL
TCONS_00143998	Factor4	0.695382	lncRNA_PBL
TCONS_00067109	Factor4	0.688309	lncRNA_PBL
TCONS_00111760	Factor4	0.688257	lncRNA_PBL
ENSBTAT00000008347	Factor4	0.686033	FT_PBL_mRNAcorrelation
ENSBTAT00000072813	Factor4	0.682619	FT_PBL_mRNAcorrelation
ENSBTAT00000060321	Factor4	0.680883	FT_PBL_mRNAcorrelation
TCONS_00148366	Factor4	0.679887	lncRNA_PBL
TCONS_00066009	Factor4	0.678207	lncRNA_PBL
TCONS_00120821	Factor4	0.673831	lncRNA_PBL
TCONS_00150653	Factor4	0.673302	lncRNA_PBL
TCONS_00053323	Factor4	0.667733	lncRNA_PBL
ENSBTAT00000047477	Factor4	0.664577	FT_PBL_mRNAcorrelation
TCONS_00039148	Factor4	0.643994	lncRNA_PBL
ENSBTAT00000065007	Factor4	0.642689	FT_PBL_mRNAcorrelation
TCONS_00041949	Factor4	0.640333	lncRNA_PBL
ENSBTAT00000062209	Factor4	0.636133	FT_PBL_mRNAcorrelation
TCONS_00000796	Factor4	0.632306	lncRNA_PBL
TCONS_00159188	Factor4	0.612236	lncRNA_PBL
TCONS_00114493	Factor4	0.610827	lncRNA_PBL
TCONS_00091027	Factor4	0.600041	lncRNA_PBL
ENSBTAT00000031917	Factor4	0.590048	FT_PBL_mRNAcorrelation
TCONS_00018160	Factor4	0.57871	lncRNA_PBL
TCONS_00143363	Factor4	0.572506	lncRNA_PBL
TCONS_00099738	Factor4	0.563306	lncRNA_PBL
ENSBTAT00000063670	Factor4	0.562671	FT_PBL_mRNAcorrelation
TCONS_00157780	Factor4	0.559184	lncRNA_PBL
TCONS_00141226	Factor4	0.554741	lncRNA_PBL
TCONS_00028099	Factor4	0.552607	lncRNA_PBL
ENSBTAT00000065637	Factor4	0.548827	FT_PBL_mRNAcorrelation
TCONS_00079454	Factor4	0.547962	lncRNA_PBL
TCONS_00069340	Factor4	0.54678	lncRNA_PBL
TCONS_00058498	Factor4	0.545425	lncRNA_PBL
TCONS_00096065	Factor4	0.534207	lncRNA_PBL
TCONS_00111406	Factor4	0.524702	lncRNA_PBL
TCONS_00026475	Factor4	0.519748	lncRNA_PBL
TCONS_00030287	Factor4	0.519637	lncRNA_PBL
TCONS_00091712	Factor4	0.513029	lncRNA_PBL
TCONS_00022689	Factor4	0.500033	lncRNA_PBL
TCONS_00079446	Factor4	0.498981	lncRNA_PBL
TCONS_00127155	Factor4	0.494566	lncRNA_PBL
ENSBTAT00000081770	Factor4	0.49422	FT_PBL_mRNAcorrelation
TCONS_00148678	Factor4	0.489136	lncRNA_PBL
TCONS_00043044	Factor4	0.477195	lncRNA_PBL
TCONS_00064985	Factor4	0.473202	lncRNA_PBL
TCONS_00126758	Factor4	0.472599	lncRNA_PBL
ENSBTAT00000072711	Factor4	0.470885	FT_PBL_mRNAcorrelation
ENSBTAT00000005113	Factor4	0.470885	FT_PBL_mRNAcorrelation
TCONS_00134691	Factor4	0.467987	lncRNA_PBL
TCONS_00094633	Factor4	0.463645	lncRNA_PBL
TCONS_00098426	Factor4	0.455622	lncRNA_PBL
TCONS_00002461	Factor4	0.452852	lncRNA_PBL
TCONS_00076523	Factor4	0.450413	lncRNA_PBL
TCONS_00158881	Factor4	0.448972	lncRNA_PBL
TCONS_00044935	Factor4	0.448336	lncRNA_PBL
TCONS_00129036	Factor4	0.432009	lncRNA_PBL
ENSBTAT00000072573	Factor4	0.431711	FT_PBL_mRNAcorrelation
TCONS_00091382	Factor4	0.42852	FT_PBL_lncRNAcorrelation
ENSBTAT00000084998	Factor4	0.427767	FT_PBL_mRNAcorrelation
TCONS_00013454	Factor4	0.425442	lncRNA_PBL
TCONS_00160121	Factor4	0.420638	lncRNA_PBL
TCONS_00084421	Factor4	0.416342	lncRNA_PBL
TCONS_00047971	Factor4	0.413957	lncRNA_PBL
TCONS_00047981	Factor4	0.413957	lncRNA_PBL
ENSBTAT00000077906	Factor4	0.411858	FT_PBL_mRNAcorrelation
ENSBTAT00000082337	Factor4	0.41162	FT_PBL_mRNAcorrelation
ENSBTAT00000071867	Factor4	0.41162	FT_PBL_mRNAcorrelation
TCONS_00128769	Factor4	0.408062	lncRNA_PBL
TCONS_00056983	Factor4	0.407539	lncRNA_PBL
XLOC_060497	Factor4	0.405601	correlated_lncRNA
ENSBTAT00000039965	Factor4	0.394053	FT_PBL_mRNAcorrelation
TCONS_00136822	Factor4	0.392639	lncRNA_PBL
TCONS_00089658	Factor4	0.392332	lncRNA_PBL
ENSBTAT00000075752	Factor4	0.385879	FT_PBL_mRNAcorrelation
ENSBTAT00000014592	Factor4	0.385879	FT_PBL_mRNAcorrelation
ENSBTAT00000017239	Factor4	0.382673	FT_PBL_mRNAcorrelation
TCONS_00000542	Factor4	0.382471	lncRNA_PBL
ENSBTAT00000054828	Factor4	0.373359	FT_PBL_mRNAcorrelation
TCONS_00100025	Factor4	0.368907	lncRNA_PBL
TCONS_00120017	Factor4	0.360173	lncRNA_PBL
TCONS_00061414	Factor4	0.359398	lncRNA_PBL
TCONS_00098437	Factor4	0.357551	lncRNA_PBL
TCONS_00107716	Factor4	0.356647	lncRNA_PBL
TCONS_00126359	Factor4	0.352833	lncRNA_PBL
TCONS_00132606	Factor4	0.352622	lncRNA_PBL
TCONS_00118540	Factor4	0.349525	lncRNA_PBL
TCONS_00092715	Factor4	0.34786	lncRNA_PBL
TCONS_00129425	Factor4	0.346866	lncRNA_PBL
TCONS_00011287	Factor4	0.346174	lncRNA_PBL
ENSBTAT00000029203	Factor4	0.346011	FT_PBL_mRNAcorrelation
ENSBTAT00000077875	Factor4	0.345885	FT_PBL_mRNAcorrelation
ENSBTAT00000073775	Factor4	0.345885	FT_PBL_mRNAcorrelation
ENSBTAT00000007549	Factor4	0.337957	FT_PBL_mRNAcorrelation
TCONS_00018625	Factor4	0.337547	lncRNA_PBL
TCONS_00143004	Factor4	0.333527	lncRNA_PBL
TCONS_00142996	Factor4	0.333527	lncRNA_PBL
ENSBTAT00000007931	Factor4	0.332782	FT_PBL_mRNAcorrelation
TCONS_00030372	Factor4	0.32768	lncRNA_PBL
TCONS_00032423	Factor4	0.317483	lncRNA_PBL
ENSBTAT00000051963	Factor4	0.315203	FT_PBL_mRNAcorrelation
ENSBTAT00000000191	Factor4	0.312782	FT_PBL_mRNAcorrelation
TCONS_00160581	Factor4	0.311833	lncRNA_PBL
TCONS_00000569	Factor4	0.307873	lncRNA_PBL
TCONS_00098408	Factor4	0.307647	lncRNA_PBL
ENSBTAT00000007077	Factor4	0.306223	FT_PBL_mRNAcorrelation
TCONS_00025547	Factor4	0.305522	lncRNA_PBL
ENSBTAT00000063809	Factor4	0.303357	FT_PBL_mRNAcorrelation
TCONS_00047967	Factor4	0.295929	lncRNA_PBL
TCONS_00096415	Factor4	0.29524	lncRNA_PBL
TCONS_00135441	Factor4	0.287261	lncRNA_PBL
ENSBTAT00000081097	Factor4	0.283347	FT_PBL_mRNAcorrelation
XLOC_057036	Factor4	0.282954	correlated_lncRNA
TCONS_00017045	Factor4	0.276137	lncRNA_PBL
TCONS_00099719	Factor4	0.275444	lncRNA_PBL
ENSBTAT00000080499	Factor4	0.274413	FT_PBL_mRNAcorrelation
ENSBTAT00000084491	Factor4	0.274413	FT_PBL_mRNAcorrelation
ENSBTAT00000053675	Factor4	0.273454	mRNA_PBL
TCONS_00085329	Factor4	0.272303	FT_PBL_lncRNAcorrelation
TCONS_00057755	Factor4	0.272236	lncRNA_PBL
ENSBTAT00000063340	Factor4	0.271574	FT_PBL_mRNAcorrelation
TCONS_00086733	Factor4	0.271218	FT_PBL_lncRNAcorrelation
TCONS_00107701	Factor4	0.266456	lncRNA_PBL
TCONS_00054239	Factor4	0.262037	lncRNA_PBL
TCONS_00101476	Factor4	0.260786	lncRNA_PBL
TCONS_00100846	Factor4	0.260281	lncRNA_PBL
TCONS_00100847	Factor4	0.260281	lncRNA_PBL
ENSBTAT00000062061	Factor4	0.259423	FT_PBL_mRNAcorrelation
TCONS_00001123	Factor4	0.256772	lncRNA_PBL
TCONS_00049332	Factor4	0.255029	lncRNA_PBL
TCONS_00098114	Factor4	0.254506	lncRNA_PBL
TCONS_00072155	Factor4	0.245607	lncRNA_PBL
TCONS_00142225	Factor4	0.235353	lncRNA_PBL
TCONS_00124214	Factor4	0.234324	lncRNA_PBL
ENSBTAT00000076760	Factor4	0.231239	FT_PBL_mRNAcorrelation
TCONS_00026701	Factor4	0.229947	lncRNA_PBL
TCONS_00025659	Factor4	0.229856	lncRNA_PBL
TCONS_00003707	Factor4	0.215185	lncRNA_PBL
TCONS_00016984	Factor4	0.213612	lncRNA_PBL
ENSBTAT00000053129	Factor4	0.207774	FT_PBL_mRNAcorrelation
TCONS_00029101	Factor4	0.206538	lncRNA_PBL
TCONS_00086625	Factor4	0.20502	lncRNA_PBL
TCONS_00018769	Factor4	0.201306	lncRNA_PBL
TCONS_00081838	Factor4	0.200572	lncRNA_PBL
TCONS_00064319	Factor4	0.197023	lncRNA_PBL
TCONS_00064321	Factor4	0.197023	lncRNA_PBL
TCONS_00151843	Factor4	0.195554	lncRNA_PBL
TCONS_00149517	Factor4	0.19431	lncRNA_PBL
TCONS_00044759	Factor4	0.194081	lncRNA_PBL
ENSBTAT00000052954	Factor4	0.190411	FT_PBL_mRNAcorrelation
TCONS_00139032	Factor4	0.188935	lncRNA_PBL
TCONS_00051405	Factor4	0.188339	lncRNA_PBL
TCONS_00118958	Factor4	0.187475	lncRNA_PBL
TCONS_00131063	Factor4	0.182819	lncRNA_PBL
TCONS_00088793	Factor4	0.181278	lncRNA_PBL
TCONS_00113720	Factor4	0.177064	lncRNA_PBL
TCONS_00113721	Factor4	0.177064	lncRNA_PBL
TCONS_00108351	Factor4	0.171558	lncRNA_PBL
TCONS_00000029	Factor4	0.16977	lncRNA_PBL
TCONS_00083603	Factor4	0.168284	lncRNA_PBL
ENSBTAT00000014649	Factor4	0.162868	FT_PBL_mRNAcorrelation
ENSBTAT00000060362	Factor4	0.158894	FT_PBL_mRNAcorrelation
TCONS_00037665	Factor4	0.158796	lncRNA_PBL
ENSBTAT00000060087	Factor4	0.15874	FT_PBL_mRNAcorrelation
TCONS_00071994	Factor4	0.157465	lncRNA_PBL
TCONS_00122628	Factor4	0.15735	lncRNA_PBL
TCONS_00003283	Factor4	0.156683	lncRNA_PBL
TCONS_00053364	Factor4	0.156201	lncRNA_PBL
TCONS_00158192	Factor4	0.155468	lncRNA_PBL
ENSBTAT00000060911	Factor4	0.154337	FT_PBL_mRNAcorrelation
TCONS_00061451	Factor4	0.152356	lncRNA_PBL
TCONS_00091422	Factor4	0.152338	FT_PBL_lncRNAcorrelation
TCONS_00017554	Factor4	0.151685	lncRNA_PBL
TCONS_00044242	Factor4	0.151239	lncRNA_PBL
TCONS_00079854	Factor4	0.149404	lncRNA_PBL
TCONS_00036139	Factor4	0.148512	lncRNA_PBL
TCONS_00115429	Factor4	0.147563	lncRNA_PBL
TCONS_00111312	Factor4	0.144419	lncRNA_PBL
ENSBTAT00000012489	Factor4	0.14111	FT_PBL_mRNAcorrelation
ENSBTAT00000071040	Factor4	0.14111	FT_PBL_mRNAcorrelation
ENSBTAT00000047409	Factor4	0.138501	FT_PBL_mRNAcorrelation
ENSBTAT00000002015	Factor4	0.137207	FT_PBL_mRNAcorrelation
ENSBTAT00000055011	Factor4	0.137207	FT_PBL_mRNAcorrelation
ENSBTAT00000045774	Factor4	0.137207	FT_PBL_mRNAcorrelation
ENSBTAT00000083946	Factor4	0.137207	FT_PBL_mRNAcorrelation
ENSBTAT00000065248	Factor4	0.137207	FT_PBL_mRNAcorrelation
ENSBTAT00000082590	Factor4	0.137207	FT_PBL_mRNAcorrelation
TCONS_00148695	Factor4	0.136419	lncRNA_PBL
ENSBTAT00000061012	Factor4	0.1363	FT_PBL_mRNAcorrelation
ENSBTAT00000080303_FT_PBL_mRNAcorrelation	Factor4	0.132742	FT_PBL_mRNAcorrelation
ENSBTAT00000017348	Factor4	0.132689	FT_PBL_mRNAcorrelation
ENSBTAT00000077106	Factor4	0.132689	FT_PBL_mRNAcorrelation
TCONS_00129609	Factor4	0.130322	lncRNA_PBL
TCONS_00050204	Factor4	0.125748	lncRNA_PBL
TCONS_00053428	Factor4	0.125087	lncRNA_PBL
TCONS_00054613	Factor4	0.12253	lncRNA_PBL
ENSBTAT00000004644	Factor4	0.120762	FT_PBL_mRNAcorrelation
ENSBTAT00000081321	Factor4	0.120762	FT_PBL_mRNAcorrelation
ENSBTAT00000017653	Factor4	0.113104	FT_PBL_mRNAcorrelation
TCONS_00002650	Factor4	0.110735	lncRNA_PBL
TCONS_00149773	Factor4	0.107882	lncRNA_PBL
TCONS_00157201	Factor4	0.104989	lncRNA_PBL
TCONS_00159414	Factor4	0.104792	lncRNA_PBL
TCONS_00013035	Factor4	0.103377	lncRNA_PBL
ENSBTAT00000087115	Factor4	0.101012	FT_PBL_mRNAcorrelation
TCONS_00089040	Factor4	0.0996025	lncRNA_PBL
TCONS_00105960	Factor4	0.0986057	lncRNA_PBL
TCONS_00091722	Factor4	0.0925874	lncRNA_PBL
TCONS_00049360	Factor4	0.0917805	lncRNA_PBL
TCONS_00053343	Factor4	0.0910724	lncRNA_PBL
TCONS_00053340	Factor4	0.0910724	lncRNA_PBL
TCONS_00150484	Factor4	0.0910151	lncRNA_PBL
TCONS_00141142	Factor4	0.0894895	lncRNA_PBL
TCONS_00104429	Factor4	0.0883884	lncRNA_PBL
TCONS_00124355	Factor4	0.0882194	lncRNA_PBL
TCONS_00149998	Factor4	0.0881607	lncRNA_PBL
TCONS_00071213	Factor4	0.0811016	lncRNA_PBL
ENSBTAT00000052574	Factor4	0.0688472	FT_PBL_mRNAcorrelation
ENSBTAT00000016296	Factor4	0.0688472	FT_PBL_mRNAcorrelation
TCONS_00099798	Factor4	0.0646324	lncRNA_PBL
TCONS_00099801	Factor4	0.0646324	lncRNA_PBL
ENSBTAT00000030941	Factor4	0.0562653	FT_PBL_mRNAcorrelation
TCONS_00033021	Factor4	0.0562511	lncRNA_PBL
TCONS_00004451	Factor4	0.0554984	lncRNA_PBL
TCONS_00020261	Factor4	0.054469	lncRNA_PBL
BovChr17Pos58946521	Factor4	0.054192	Genomic
TCONS_00077528	Factor4	0.0522399	lncRNA_PBL
TCONS_00034754	Factor4	0.0503495	lncRNA_PBL
TCONS_00106205	Factor4	0.0486823	lncRNA_PBL
TCONS_00044520	Factor4	0.0484733	lncRNA_PBL
ENSBTAT00000072352	Factor4	0.0472123	FT_PBL_mRNAcorrelation
TCONS_00147927	Factor4	0.0460088	lncRNA_PBL
TCONS_00008850	Factor4	0.0420947	lncRNA_PBL
TCONS_00142368	Factor4	0.0420177	lncRNA_PBL
ENSBTAT00000010543	Factor4	0.0390717	FT_PBL_mRNAcorrelation
TCONS_00053403	Factor4	0.0362698	lncRNA_PBL
TCONS_00119275	Factor4	0.0357065	lncRNA_PBL
TCONS_00119274	Factor4	0.0357065	lncRNA_PBL
TCONS_00092963	Factor4	0.0303391	lncRNA_PBL
ENSBTAT00000025313	Factor4	0.0293511	FT_PBL_mRNAcorrelation
TCONS_00025311	Factor4	0.0289055	lncRNA_PBL
BovChr5Pos38483708	Factor4	0.0284073	Genomic
ENSBTAT00000009152	Factor4	0.0282776	FT_PBL_mRNAcorrelation
BovChr3Pos87458490	Factor4	0.0280872	Genomic
BovChr3Pos91549234	Factor4	0.0280872	Genomic
BovChr3Pos88821997	Factor4	0.0258549	Genomic
BovChr14Pos80813248	Factor4	0.025405	Genomic
BovChr1Pos146497300	Factor4	0.0243144	Genomic
BovChr3Pos96202292	Factor4	0.0239534	Genomic
TCONS_00097540	Factor4	0.023648	lncRNA_PBL
ENSBTAT00000044505	Factor4	0.0227377	FT_PBL_mRNAcorrelation
ENSBTAT00000002174	Factor4	0.0227377	FT_PBL_mRNAcorrelation
BovChr8Pos87245919	Factor4	0.0226599	Genomic
BovChr5Pos87901217	Factor4	0.0210104	Genomic
BovChr3Pos92637901	Factor4	0.0205459	Genomic
TCONS_00018632	Factor4	0.0202537	lncRNA_PBL
BovChr5Pos89051206	Factor4	0.0201311	Genomic
BovChr5Pos88647267	Factor4	0.0196736	Genomic
ENSBTAT00000060010	Factor4	0.0195703	FT_PBL_mRNAcorrelation
BovChr5Pos41084896	Factor4	0.0192872	Genomic
BovChr17Pos49107623	Factor4	0.0178507	Genomic
TCONS_00096752	Factor4	0.0176014	lncRNA_PBL
BovChr23Pos43909068	Factor4	0.0170904	Genomic
BovChr18Pos32192982	Factor4	0.0158463	Genomic
BovChr1Pos141365527	Factor4	0.0152592	Genomic
BovChr3Pos89098449	Factor4	0.0146036	Genomic
ENSBTAT00000063250	Factor4	0.0144647	FT_PBL_mRNAcorrelation
ENSBTAT00000000975	Factor4	0.0131108	FT_PBL_mRNAcorrelation
BovChr1Pos147295445	Factor4	0.012731	Genomic
ENSBTAT00000080968	Factor4	0.0127256	FT_PBL_mRNAcorrelation
TCONS_00090496	Factor4	0.0125614	lncRNA_PBL
ENSBTAT00000066269	Factor4	0.0124148	FT_PBL_mRNAcorrelation
TCONS_00075162	Factor4	0.0121797	lncRNA_PBL
BovChr3Pos87056414	Factor4	0.0121541	Genomic
BovChr5Pos71548472	Factor4	0.0121185	Genomic
BovChr28Pos26892434	Factor4	0.0119425	Genomic
BovChr3Pos34903364	Factor4	0.0116743	Genomic
BovChr8Pos36246265	Factor4	0.0113755	Genomic
BovChr1Pos152960777	Factor4	0.011268	Genomic
BovChr19Pos41594056	Factor4	0.0105101	Genomic
BovChr1Pos59924376	Factor4	0.00872587	Genomic
BovChr1Pos141793240	Factor4	0.00772741	Genomic
BovChr1Pos147338727	Factor4	0.00729435	Genomic
TCONS_00159347	Factor4	0.0072863	lncRNA_PBL
BovChr18Pos57151314	Factor4	0.00570817	Genomic
ENSBTAT00000034283	Factor4	0.00537013	FT_PBL_mRNAcorrelation
ENSBTAT00000034282	Factor4	0.00537013	FT_PBL_mRNAcorrelation
BovChr25Pos1825647	Factor4	0.0053636	Genomic
BovChr28Pos30633568	Factor4	0.00478254	Genomic
BovChr4Pos87598662	Factor4	0.00438575	Genomic
BovChr3Pos92431268	Factor4	0.00404153	Genomic
BovChr18Pos58716448	Factor4	0.00336596	Genomic
BovChr15Pos5234380	Factor4	0.00334404	Genomic
BovChr5Pos87192767	Factor4	0.00333021	Genomic
BovChr27Pos38172660	Factor4	0.00310667	Genomic
BovChr17Pos46078006	Factor4	0.00259095	Genomic
BovChr3Pos88966274	Factor4	0.00218566	Genomic
BovChr28Pos27400738	Factor4	0.00210769	Genomic
BovChr3Pos88991871	Factor4	0.00183026	Genomic
BovChr8Pos71492939	Factor4	0.00177941	Genomic
BovChr18Pos57682137	Factor4	0.000929813	Genomic
BovChr8Pos35438545	Factor4	0.000877528	Genomic
TCONS_00041770	Factor4	0.000740005	lncRNA_PBL
BovChr10Pos81223782	Factor4	0.00033378	Genomic
BovChr18Pos61330975	Factor4	0.000241203	Genomic
BovChr1Pos147241898	Factor4	0.000218727	Genomic
TCONS_00089091	Factor4	0	lncRNA_PBL
TCONS_00075330	Factor4	0	lncRNA_PBL
TCONS_00100887	Factor4	0	lncRNA_PBL
TCONS_00038463	Factor4	0	lncRNA_PBL
TCONS_00143133	Factor4	0	lncRNA_PBL
ENSBTAT00000085877	Factor4	0	mRNA_PBL
BovChr5Pos115916818	Factor4	-0.000110408	Genomic
BovChr10Pos81113154	Factor4	-0.00033378	Genomic
BovChr15Pos9454207	Factor4	-0.00124508	Genomic
BovChr17Pos46005257	Factor4	-0.00152143	Genomic
BovChr8Pos60881902	Factor4	-0.001577	Genomic
ENSBTAT00000002019	Factor4	-0.00197055	FT_PBL_mRNAcorrelation
BovChr28Pos27459868	Factor4	-0.00215407	Genomic
BovChr3Pos88912286	Factor4	-0.00218566	Genomic
BovChr27Pos35710124	Factor4	-0.0023785	Genomic
BovChr3Pos92418182	Factor4	-0.00404153	Genomic
TCONS_00053526	Factor4	-0.00457067	lncRNA_PBL
ENSBTAT00000079805	Factor4	-0.00507566	FT_PBL_mRNAcorrelation
ENSBTAT00000010956	Factor4	-0.00507566	FT_PBL_mRNAcorrelation
ENSBTAT00000074509	Factor4	-0.00507566	FT_PBL_mRNAcorrelation
BovChr10Pos61162083	Factor4	-0.0056653	Genomic
BovChr10Pos65020001	Factor4	-0.0056653	Genomic
BovChr16Pos26388857	Factor4	-0.00596579	Genomic
BovChr21Pos23567453	Factor4	-0.00608012	Genomic
BovChr21Pos23723788	Factor4	-0.00608012	Genomic
BovChr3Pos89181812	Factor4	-0.00613276	Genomic
ENSBTAT00000019939	Factor4	-0.00661899	FT_PBL_mRNAcorrelation
TCONS_00006012	Factor4	-0.00732055	lncRNA_PBL
BovChr8Pos37458257	Factor4	-0.00780701	Genomic
BovChr15Pos7037828	Factor4	-0.00791398	Genomic
BovChr1Pos140713996	Factor4	-0.00791584	Genomic
BovChr27Pos23369775	Factor4	-0.00793933	Genomic
BovChr3Pos30167683	Factor4	-0.00843287	Genomic
BovChr3Pos89365301	Factor4	-0.00939059	Genomic
BovChr14Pos78508738	Factor4	-0.00990165	Genomic
BovChr14Pos78522424	Factor4	-0.0106044	Genomic
BovChr10Pos61837266	Factor4	-0.0113579	Genomic
BovChr3Pos93668143	Factor4	-0.0125428	Genomic
BovChr3Pos93849644	Factor4	-0.0125428	Genomic
BovChr3Pos93976377	Factor4	-0.0125428	Genomic
BovChr28Pos42578721	Factor4	-0.012552	Genomic
BovChr18Pos32277796	Factor4	-0.0134116	Genomic
BovChr1Pos49415050	Factor4	-0.0145063	Genomic
BovChr15Pos5127591	Factor4	-0.014681	Genomic
BovChr5Pos87846351	Factor4	-0.0149883	Genomic
BovChr10Pos65055281	Factor4	-0.015305	Genomic
TCONS_00099262	Factor4	-0.0156578	lncRNA_PBL
BovChr10Pos61137869	Factor4	-0.0159074	Genomic
BovChr14Pos78489957	Factor4	-0.016425	Genomic
BovChr1Pos45105866	Factor4	-0.0165817	Genomic
TCONS_00141398	Factor4	-0.0166391	lncRNA_PBL
BovChr23Pos44070630	Factor4	-0.0172852	Genomic
BovChr10Pos81229490	Factor4	-0.0175677	Genomic
BovChr28Pos27160954	Factor4	-0.0178892	Genomic
BovChr18Pos56124130	Factor4	-0.0179897	Genomic
ENSBTAT00000063682	Factor4	-0.0183789	FT_PBL_mRNAcorrelation
ENSBTAT00000010081	Factor4	-0.0190655	FT_PBL_mRNAcorrelation
BovChr18Pos33388109	Factor4	-0.0207013	Genomic
BovChr5Pos88182902	Factor4	-0.0210104	Genomic
TCONS_00150856	Factor4	-0.0224507	lncRNA_PBL
BovChr5Pos87473596	Factor4	-0.0225821	Genomic
BovChr8Pos36002556	Factor4	-0.0226863	Genomic
TCONS_00054681	Factor4	-0.0230789	lncRNA_PBL
ENSBTAT00000072221	Factor4	-0.0233493	FT_PBL_mRNAcorrelation
ENSBTAT00000086173	Factor4	-0.0233493	FT_PBL_mRNAcorrelation
BovChr10Pos49448554	Factor4	-0.0233937	Genomic
BovChr5Pos87262266	Factor4	-0.024109	Genomic
BovChr3Pos92302468	Factor4	-0.0280871	Genomic
BovChr17Pos46524672	Factor4	-0.0289267	Genomic
BovChr5Pos88079689	Factor4	-0.029101	Genomic
BovChr5Pos116526173	Factor4	-0.0311477	Genomic
BovChr11Pos46350640	Factor4	-0.033586	Genomic
BovChr4Pos52315044	Factor4	-0.0336867	Genomic
TCONS_00112217	Factor4	-0.0339229	lncRNA_PBL
TCONS_00008818	Factor4	-0.0349023	lncRNA_PBL
BovChr28Pos24217547	Factor4	-0.038032	Genomic
ENSBTAT00000028731	Factor4	-0.0384433	FT_PBL_mRNAcorrelation
BovChr5Pos118053957	Factor4	-0.0416293	Genomic
TCONS_00138856	Factor4	-0.0449257	lncRNA_PBL
TCONS_00100308	Factor4	-0.0531427	lncRNA_PBL
BovChr10Pos62442084	Factor4	-0.0536711	Genomic
TCONS_00025600	Factor4	-0.0538553	lncRNA_PBL
ENSBTAT00000006940	Factor4	-0.0562634	FT_PBL_mRNAcorrelation
TCONS_00039882	Factor4	-0.0607513	lncRNA_PBL
ENSBTAT00000012873	Factor4	-0.0626059	FT_PBL_mRNAcorrelation
TCONS_00063332	Factor4	-0.062971	lncRNA_PBL
ENSBTAT00000039742	Factor4	-0.0650894	FT_PBL_mRNAcorrelation
ENSBTAT00000079230	Factor4	-0.0650894	FT_PBL_mRNAcorrelation
ENSBTAT00000071874	Factor4	-0.0650894	FT_PBL_mRNAcorrelation
TCONS_00093783	Factor4	-0.0678839	lncRNA_PBL
TCONS_00043202	Factor4	-0.0707074	lncRNA_PBL
TCONS_00024184	Factor4	-0.0731615	lncRNA_PBL
TCONS_00112746	Factor4	-0.0791663	lncRNA_PBL
TCONS_00158660	Factor4	-0.0812827	lncRNA_PBL
TCONS_00125370	Factor4	-0.0816888	lncRNA_PBL
TCONS_00140956	Factor4	-0.0825573	lncRNA_PBL
TCONS_00140957	Factor4	-0.0825573	lncRNA_PBL
TCONS_00110359	Factor4	-0.0838359	lncRNA_PBL
TCONS_00027753	Factor4	-0.0858221	lncRNA_PBL
TCONS_00046161	Factor4	-0.0889968	lncRNA_PBL
TCONS_00004427	Factor4	-0.0915423	lncRNA_PBL
TCONS_00128532	Factor4	-0.0939241	lncRNA_PBL
TCONS_00161612	Factor4	-0.0990771	lncRNA_PBL
TCONS_00005980	Factor4	-0.0990848	lncRNA_PBL
TCONS_00125778	Factor4	-0.101772	lncRNA_PBL
TCONS_00111985	Factor4	-0.103145	lncRNA_PBL
TCONS_00043359	Factor4	-0.113112	lncRNA_PBL
TCONS_00039448	Factor4	-0.120539	lncRNA_PBL
ENSBTAT00000033464	Factor4	-0.121475	FT_PBL_mRNAcorrelation
ENSBTAT00000065252	Factor4	-0.121475	FT_PBL_mRNAcorrelation
TCONS_00061145	Factor4	-0.121622	lncRNA_PBL
TCONS_00075574	Factor4	-0.128743	lncRNA_PBL
TCONS_00047585	Factor4	-0.129604	lncRNA_PBL
TCONS_00162376	Factor4	-0.132968	lncRNA_PBL
TCONS_00042983	Factor4	-0.134214	lncRNA_PBL
TCONS_00069298	Factor4	-0.145874	lncRNA_PBL
TCONS_00069299	Factor4	-0.145874	lncRNA_PBL
TCONS_00158973	Factor4	-0.14892	lncRNA_PBL
TCONS_00002627	Factor4	-0.150399	lncRNA_PBL
ENSBTAT00000083235	Factor4	-0.156255	FT_PBL_mRNAcorrelation
ENSBTAT00000081805	Factor4	-0.156255	FT_PBL_mRNAcorrelation
ENSBTAT00000027302	Factor4	-0.156255	FT_PBL_mRNAcorrelation
TCONS_00130622	Factor4	-0.164275	lncRNA_PBL
TCONS_00105280	Factor4	-0.16551	lncRNA_PBL
TCONS_00024185	Factor4	-0.165934	lncRNA_PBL
ENSBTAT00000022882	Factor4	-0.169541	FT_PBL_mRNAcorrelation
TCONS_00088904	Factor4	-0.169905	lncRNA_PBL
TCONS_00036603	Factor4	-0.171405	lncRNA_PBL
ENSBTAT00000024393	Factor4	-0.179642	FT_PBL_mRNAcorrelation
ENSBTAT00000080012	Factor4	-0.186335	FT_PBL_mRNAcorrelation
TCONS_00124156	Factor4	-0.197928	lncRNA_PBL
TCONS_00117932	Factor4	-0.209266	lncRNA_PBL
TCONS_00092076	Factor4	-0.215219	lncRNA_PBL
TCONS_00053076	Factor4	-0.215416	lncRNA_PBL
TCONS_00039317	Factor4	-0.216349	lncRNA_PBL
ENSBTAT00000005857	Factor4	-0.221767	FT_PBL_mRNAcorrelation
ENSBTAT00000054050	Factor4	-0.234287	FT_PBL_mRNAcorrelation
TCONS_00018291	Factor4	-0.234586	lncRNA_PBL
TCONS_00047741	Factor4	-0.239865	FT_PBL_lncRNAcorrelation
ENSBTAT00000056330	Factor4	-0.241519	FT_PBL_mRNAcorrelation
TCONS_00159728	Factor4	-0.244031	lncRNA_PBL
TCONS_00025730	Factor4	-0.248015	lncRNA_PBL
TCONS_00044187	Factor4	-0.258668	lncRNA_PBL
TCONS_00023610	Factor4	-0.263457	lncRNA_PBL
XLOC_002754	Factor4	-0.266462	correlated_lncRNA
TCONS_00069198	Factor4	-0.278565	lncRNA_PBL
TCONS_00112307	Factor4	-0.284453	lncRNA_PBL
TCONS_00096337	Factor4	-0.288139	lncRNA_PBL
TCONS_00061578	Factor4	-0.292507	lncRNA_PBL
TCONS_00112543	Factor4	-0.306146	lncRNA_PBL
ENSBTAT00000075701	Factor4	-0.309527	FT_PBL_mRNAcorrelation
TCONS_00107013	Factor4	-0.313954	lncRNA_PBL
ENSBTAT00000002554	Factor4	-0.318557	FT_PBL_mRNAcorrelation
TCONS_00027632	Factor4	-0.319978	lncRNA_PBL
TCONS_00003867	Factor4	-0.325756	lncRNA_PBL
TCONS_00030448	Factor4	-0.331073	lncRNA_PBL
TCONS_00037124	Factor4	-0.33247	lncRNA_PBL
TCONS_00147174	Factor4	-0.336155	lncRNA_PBL
TCONS_00039806	Factor4	-0.343583	lncRNA_PBL
TCONS_00020836	Factor4	-0.349499	lncRNA_PBL
TCONS_00145672	Factor4	-0.354823	lncRNA_PBL
TCONS_00000374	Factor4	-0.358531	lncRNA_PBL
TCONS_00047565	Factor4	-0.359844	lncRNA_PBL
ENSBTAT00000078698	Factor4	-0.361491	FT_PBL_mRNAcorrelation
ENSBTAT00000070950	Factor4	-0.361491	FT_PBL_mRNAcorrelation
ENSBTAT00000032447	Factor4	-0.361491	FT_PBL_mRNAcorrelation
XLOC_027299	Factor4	-0.367725	correlated_lncRNA
TCONS_00097827	Factor4	-0.369874	lncRNA_PBL
TCONS_00121414	Factor4	-0.370324	lncRNA_PBL
ENSBTAT00000080689	Factor4	-0.373602	FT_PBL_mRNAcorrelation
TCONS_00002200	Factor4	-0.376585	lncRNA_PBL
TCONS_00036060	Factor4	-0.378235	lncRNA_PBL
ENSBTAT00000004933	Factor4	-0.383474	FT_PBL_mRNAcorrelation
ENSBTAT00000086793	Factor4	-0.383474	FT_PBL_mRNAcorrelation
ENSBTAT00000066560	Factor4	-0.383474	FT_PBL_mRNAcorrelation
TCONS_00075516	Factor4	-0.384247	lncRNA_PBL
TCONS_00074028	Factor4	-0.385915	lncRNA_PBL
TCONS_00124297	Factor4	-0.391808	lncRNA_PBL
ENSBTAT00000004404	Factor4	-0.397027	FT_PBL_mRNAcorrelation
ENSBTAT00000004405	Factor4	-0.397027	FT_PBL_mRNAcorrelation
ENSBTAT00000084737	Factor4	-0.397027	FT_PBL_mRNAcorrelation
ENSBTAT00000083896	Factor4	-0.397027	FT_PBL_mRNAcorrelation
TCONS_00043653	Factor4	-0.399943	lncRNA_PBL
TCONS_00126884	Factor4	-0.408237	lncRNA_PBL
TCONS_00026261	Factor4	-0.408502	lncRNA_PBL
TCONS_00107203	Factor4	-0.410947	lncRNA_PBL
ENSBTAT00000046675	Factor4	-0.413736	FT_PBL_mRNAcorrelation
TCONS_00023697	Factor4	-0.418357	lncRNA_PBL
TCONS_00019551	Factor4	-0.423194	lncRNA_PBL
TCONS_00098043	Factor4	-0.426425	lncRNA_PBL
TCONS_00001461	Factor4	-0.426631	lncRNA_PBL
TCONS_00081142	Factor4	-0.430263	lncRNA_PBL
TCONS_00032166	Factor4	-0.433758	lncRNA_PBL
TCONS_00136972	Factor4	-0.436699	lncRNA_PBL
TCONS_00010780	Factor4	-0.437713	lncRNA_PBL
TCONS_00098283	Factor4	-0.44146	lncRNA_PBL
TCONS_00130592	Factor4	-0.452364	lncRNA_PBL
TCONS_00140196	Factor4	-0.46013	lncRNA_PBL
TCONS_00012359	Factor4	-0.46071	lncRNA_PBL
TCONS_00098523	Factor4	-0.466599	lncRNA_PBL
TCONS_00023641	Factor4	-0.477541	lncRNA_PBL
ENSBTAT00000067811	Factor4	-0.479823	FT_PBL_mRNAcorrelation
ENSBTAT00000020613	Factor4	-0.479823	FT_PBL_mRNAcorrelation
TCONS_00145050	Factor4	-0.481598	lncRNA_PBL
TCONS_00138346	Factor4	-0.48869	lncRNA_PBL
TCONS_00051595	Factor4	-0.488813	lncRNA_PBL
TCONS_00119403	Factor4	-0.493048	lncRNA_PBL
TCONS_00114247	Factor4	-0.493442	lncRNA_PBL
TCONS_00147757	Factor4	-0.497606	lncRNA_PBL
TCONS_00147758	Factor4	-0.497606	lncRNA_PBL
ENSBTAT00000060036	Factor4	-0.499243	FT_PBL_mRNAcorrelation
TCONS_00119757	Factor4	-0.499503	lncRNA_PBL
TCONS_00044975	Factor4	-0.50499	lncRNA_PBL
TCONS_00077054	Factor4	-0.507911	lncRNA_PBL
TCONS_00028196	Factor4	-0.511821	lncRNA_PBL
TCONS_00002626	Factor4	-0.513978	lncRNA_PBL
TCONS_00147049	Factor4	-0.544356	lncRNA_PBL
TCONS_00085742	Factor4	-0.548549	lncRNA_PBL
TCONS_00031219	Factor4	-0.554408	lncRNA_PBL
TCONS_00012085	Factor4	-0.555297	lncRNA_PBL
TCONS_00139365	Factor4	-0.555574	lncRNA_PBL
XLOC_039385	Factor4	-0.556587	correlated_lncRNA
TCONS_00149502	Factor4	-0.57233	lncRNA_PBL
TCONS_00068191	Factor4	-0.576791	lncRNA_PBL
TCONS_00037073	Factor4	-0.5776	lncRNA_PBL
ENSBTAT00000012008	Factor4	-0.581158	FT_PBL_mRNAcorrelation
TCONS_00108174	Factor4	-0.584631	lncRNA_PBL
TCONS_00144599	Factor4	-0.587687	lncRNA_PBL
TCONS_00072008	Factor4	-0.590554	lncRNA_PBL
TCONS_00134866	Factor4	-0.595774	lncRNA_PBL
TCONS_00142246	Factor4	-0.597276	lncRNA_PBL
TCONS_00121663	Factor4	-0.612378	lncRNA_PBL
TCONS_00012368	Factor4	-0.614292	lncRNA_PBL
TCONS_00022155	Factor4	-0.624276	lncRNA_PBL
TCONS_00008793	Factor4	-0.637893	lncRNA_PBL
TCONS_00125794	Factor4	-0.641522	lncRNA_PBL
TCONS_00041346	Factor4	-0.650287	lncRNA_PBL
TCONS_00076893	Factor4	-0.65515	lncRNA_PBL
TCONS_00154680	Factor4	-0.659767	lncRNA_PBL
TCONS_00032496	Factor4	-0.659904	lncRNA_PBL
ENSBTAT00000002177	Factor4	-0.662712	FT_PBL_mRNAcorrelation
TCONS_00111372	Factor4	-0.663166	lncRNA_PBL
ENSBTAT00000069805	Factor4	-0.663321	FT_PBL_mRNAcorrelation
ENSBTAT00000052893	Factor4	-0.663321	FT_PBL_mRNAcorrelation
TCONS_00127876	Factor4	-0.680794	lncRNA_PBL
TCONS_00109742	Factor4	-0.691957	lncRNA_PBL
TCONS_00120772	Factor4	-0.695303	lncRNA_PBL
TCONS_00031449	Factor4	-0.701834	lncRNA_PBL
TCONS_00056680	Factor4	-0.702346	lncRNA_PBL
TCONS_00125777	Factor4	-0.710316	lncRNA_PBL
TCONS_00133100	Factor4	-0.713922	lncRNA_PBL
TCONS_00121377	Factor4	-0.714301	lncRNA_PBL
TCONS_00131146	Factor4	-0.715146	lncRNA_PBL
ENSBTAT00000064376	Factor4	-0.71519	FT_PBL_mRNAcorrelation
TCONS_00146209	Factor4	-0.715789	lncRNA_PBL
TCONS_00146208	Factor4	-0.715789	lncRNA_PBL
TCONS_00146207	Factor4	-0.715789	lncRNA_PBL
TCONS_00146210	Factor4	-0.715789	lncRNA_PBL
TCONS_00146206	Factor4	-0.715789	lncRNA_PBL
TCONS_00006110	Factor4	-0.722559	lncRNA_PBL
TCONS_00158679	Factor4	-0.723081	lncRNA_PBL
TCONS_00101240	Factor4	-0.72368	lncRNA_PBL
TCONS_00086072	Factor4	-0.760554	lncRNA_PBL
TCONS_00044750	Factor4	-0.765306	lncRNA_PBL
TCONS_00034742	Factor4	-0.77617	lncRNA_PBL
TCONS_00040004	Factor4	-0.784931	lncRNA_PBL
TCONS_00058749	Factor4	-0.786325	lncRNA_PBL
TCONS_00001878	Factor4	-0.788419	lncRNA_PBL
TCONS_00052688	Factor4	-0.793332	lncRNA_PBL
TCONS_00136918	Factor4	-0.802393	lncRNA_PBL
TCONS_00005565	Factor4	-0.803622	lncRNA_PBL
TCONS_00159760	Factor4	-0.805595	lncRNA_PBL
TCONS_00050140	Factor4	-0.814831	lncRNA_PBL
TCONS_00159058	Factor4	-0.818687	lncRNA_PBL
TCONS_00073050	Factor4	-0.818904	lncRNA_PBL
TCONS_00100860	Factor4	-0.824768	lncRNA_PBL
ENSBTAT00000015929	Factor4	-0.831187	FT_PBL_mRNAcorrelation
ENSBTAT00000069897	Factor4	-0.831187	FT_PBL_mRNAcorrelation
ENSBTAT00000071024	Factor4	-0.831187	FT_PBL_mRNAcorrelation
TCONS_00079517	Factor4	-0.844065	lncRNA_PBL
TCONS_00087133	Factor4	-0.844251	lncRNA_PBL
TCONS_00102571	Factor4	-0.846126	lncRNA_PBL
TCONS_00158968	Factor4	-0.849803	lncRNA_PBL
TCONS_00101280	Factor4	-0.879492	lncRNA_PBL
TCONS_00130435	Factor4	-0.879666	lncRNA_PBL
TCONS_00129514	Factor4	-0.88805	lncRNA_PBL
TCONS_00139384	Factor4	-0.903187	lncRNA_PBL
TCONS_00003218	Factor4	-0.907397	lncRNA_PBL
TCONS_00131920	Factor4	-0.909013	lncRNA_PBL
TCONS_00050522	Factor4	-0.910119	lncRNA_PBL
TCONS_00157333	Factor4	-0.911164	lncRNA_PBL
TCONS_00006450	Factor4	-0.913347	lncRNA_PBL
TCONS_00136216	Factor4	-0.913782	lncRNA_PBL
TCONS_00000332	Factor4	-0.922604	lncRNA_PBL
TCONS_00084573	Factor4	-0.923823	lncRNA_PBL
TCONS_00146697	Factor4	-0.926765	lncRNA_PBL
TCONS_00123865	Factor4	-0.94168	lncRNA_PBL
TCONS_00114333	Factor4	-0.942749	lncRNA_PBL
XLOC_004951	Factor4	-0.95263	correlated_lncRNA
TCONS_00057720	Factor4	-0.955801	lncRNA_PBL
TCONS_00022781	Factor4	-0.976428	lncRNA_PBL
TCONS_00145665	Factor4	-0.978788	lncRNA_PBL
TCONS_00053831	Factor4	-0.97938	lncRNA_PBL
TCONS_00071848	Factor4	-0.989616	lncRNA_PBL
TCONS_00076701	Factor4	-0.99348	lncRNA_PBL
TCONS_00072273	Factor4	-1.01547	lncRNA_PBL
TCONS_00014848	Factor4	-1.02038	lncRNA_PBL
TCONS_00030572	Factor4	-1.03792	lncRNA_PBL
TCONS_00127612	Factor4	-1.0397	lncRNA_PBL
TCONS_00059144	Factor4	-1.05529	FT_PBL_lncRNAcorrelation
TCONS_00158914	Factor4	-1.06025	lncRNA_PBL
TCONS_00160602	Factor4	-1.06792	lncRNA_PBL
TCONS_00044748	Factor4	-1.07127	lncRNA_PBL
TCONS_00148379	Factor4	-1.07143	lncRNA_PBL
TCONS_00146685	Factor4	-1.10486	lncRNA_PBL
TCONS_00078470	Factor4	-1.1102	lncRNA_PBL
TCONS_00133765	Factor4	-1.13026	lncRNA_PBL
TCONS_00126329	Factor4	-1.1322	lncRNA_PBL
TCONS_00160378	Factor4	-1.14698	lncRNA_PBL
TCONS_00148377	Factor4	-1.16602	lncRNA_PBL
TCONS_00058727	Factor4	-1.16629	lncRNA_PBL
TCONS_00107822	Factor4	-1.16917	lncRNA_PBL
TCONS_00085801	Factor4	-1.16972	lncRNA_PBL
TCONS_00135216	Factor4	-1.17052	lncRNA_PBL
TCONS_00000539	Factor4	-1.17596	lncRNA_PBL
TCONS_00121000	Factor4	-1.17912	lncRNA_PBL
TCONS_00093443	Factor4	-1.18119	lncRNA_PBL
TCONS_00099721	Factor4	-1.18408	lncRNA_PBL
TCONS_00041424	Factor4	-1.18449	lncRNA_PBL
TCONS_00000550	Factor4	-1.18556	lncRNA_PBL
XLOC_011521	Factor4	-1.18559	correlated_lncRNA
TCONS_00004573	Factor4	-1.1965	lncRNA_PBL
ENSBTAT00000016390	Factor4	-1.1987	FT_PBL_mRNAcorrelation
TCONS_00138819	Factor4	-1.19969	lncRNA_PBL
ENSBTAT00000004378	Factor4	-1.21811	FT_PBL_mRNAcorrelation
TCONS_00011774	Factor4	-1.22298	lncRNA_PBL
TCONS_00096146	Factor4	-1.22334	lncRNA_PBL
TCONS_00041053	Factor4	-1.2247	lncRNA_PBL
TCONS_00025836	Factor4	-1.22842	lncRNA_PBL
TCONS_00160971	Factor4	-1.22937	lncRNA_PBL
TCONS_00051550	Factor4	-1.23469	lncRNA_PBL
TCONS_00040162	Factor4	-1.23519	lncRNA_PBL
ENSBTAT00000006518	Factor4	-1.23639	FT_PBL_mRNAcorrelation
TCONS_00092314	Factor4	-1.23771	lncRNA_PBL
TCONS_00011825	Factor4	-1.25252	lncRNA_PBL
XLOC_002163	Factor4	-1.26205	correlated_lncRNA
TCONS_00120946	Factor4	-1.26689	lncRNA_PBL
TCONS_00078103	Factor4	-1.27299	lncRNA_PBL
TCONS_00041300	Factor4	-1.28105	lncRNA_PBL
TCONS_00014056	Factor4	-1.28171	lncRNA_PBL
TCONS_00139085	Factor4	-1.28578	lncRNA_PBL
TCONS_00065226	Factor4	-1.29187	lncRNA_PBL
XLOC_071684	Factor4	-1.2962	correlated_lncRNA
TCONS_00130412	Factor4	-1.29825	lncRNA_PBL
TCONS_00098862	Factor4	-1.29891	lncRNA_PBL
TCONS_00109264	Factor4	-1.29997	lncRNA_PBL
TCONS_00008148	Factor4	-1.30302	lncRNA_PBL
TCONS_00014464	Factor4	-1.30724	lncRNA_PBL
TCONS_00147568	Factor4	-1.31912	lncRNA_PBL
TCONS_00050280	Factor4	-1.32104	lncRNA_PBL
TCONS_00039695	Factor4	-1.33017	lncRNA_PBL
TCONS_00016158	Factor4	-1.33933	lncRNA_PBL
TCONS_00118350	Factor4	-1.34144	lncRNA_PBL
TCONS_00095276	Factor4	-1.34255	lncRNA_PBL
TCONS_00021783	Factor4	-1.35091	lncRNA_PBL
TCONS_00044710	Factor4	-1.35177	lncRNA_PBL
TCONS_00120070	Factor4	-1.35525	lncRNA_PBL
TCONS_00130817	Factor4	-1.36392	lncRNA_PBL
TCONS_00000990	Factor4	-1.37204	lncRNA_PBL
TCONS_00027564	Factor4	-1.37853	lncRNA_PBL
TCONS_00077454	Factor4	-1.38032	lncRNA_PBL
TCONS_00139660	Factor4	-1.38036	lncRNA_PBL
TCONS_00131530	Factor4	-1.38447	lncRNA_PBL
TCONS_00053337	Factor4	-1.38517	lncRNA_PBL
TCONS_00085851	Factor4	-1.41127	lncRNA_PBL
TCONS_00058888	Factor4	-1.41396	lncRNA_PBL
TCONS_00086644	Factor4	-1.42701	lncRNA_PBL
TCONS_00078079	Factor4	-1.44888	lncRNA_PBL
TCONS_00144634	Factor4	-1.45363	lncRNA_PBL
TCONS_00078970	Factor4	-1.4598	lncRNA_PBL
TCONS_00000316	Factor4	-1.46049	lncRNA_PBL
TCONS_00131149	Factor4	-1.46415	lncRNA_PBL
TCONS_00111322	Factor4	-1.46725	lncRNA_PBL
TCONS_00120767	Factor4	-1.50002	lncRNA_PBL
TCONS_00132084	Factor4	-1.50123	lncRNA_PBL
TCONS_00068514	Factor4	-1.50403	lncRNA_PBL
TCONS_00069153	Factor4	-1.51184	lncRNA_PBL
TCONS_00118596	Factor4	-1.5171	lncRNA_PBL
TCONS_00121007	Factor4	-1.51882	lncRNA_PBL
TCONS_00045658	Factor4	-1.5207	lncRNA_PBL
TCONS_00134969	Factor4	-1.52231	lncRNA_PBL
TCONS_00028207	Factor4	-1.54697	lncRNA_PBL
TCONS_00077484	Factor4	-1.55308	lncRNA_PBL
TCONS_00025168	Factor4	-1.56088	lncRNA_PBL
TCONS_00009738	Factor4	-1.5653	lncRNA_PBL
TCONS_00015183	Factor4	-1.56605	lncRNA_PBL
TCONS_00082417	Factor4	-1.58951	lncRNA_PBL
TCONS_00099717	Factor4	-1.59353	lncRNA_PBL
TCONS_00069990	Factor4	-1.59646	lncRNA_PBL
TCONS_00119654	Factor4	-1.60115	lncRNA_PBL
TCONS_00022661	Factor4	-1.60176	lncRNA_PBL
TCONS_00014033	Factor4	-1.60476	lncRNA_PBL
TCONS_00114682	Factor4	-1.61601	lncRNA_PBL
TCONS_00131019	Factor4	-1.61857	lncRNA_PBL
TCONS_00001916	Factor4	-1.6193	lncRNA_PBL
TCONS_00149952	Factor4	-1.62868	lncRNA_PBL
TCONS_00148844	Factor4	-1.63107	lncRNA_PBL
TCONS_00023539	Factor4	-1.63228	lncRNA_PBL
TCONS_00105366	Factor4	-1.63978	lncRNA_PBL
TCONS_00003708	Factor4	-1.65105	lncRNA_PBL
TCONS_00032205	Factor4	-1.65471	lncRNA_PBL
TCONS_00070881	Factor4	-1.6604	lncRNA_PBL
TCONS_00039954	Factor4	-1.67918	lncRNA_PBL
TCONS_00147021	Factor4	-1.68428	lncRNA_PBL
TCONS_00005022	Factor4	-1.70463	lncRNA_PBL
TCONS_00139631	Factor4	-1.73686	lncRNA_PBL
TCONS_00011932	Factor4	-1.73961	lncRNA_PBL
TCONS_00098439	Factor4	-1.7441	lncRNA_PBL
TCONS_00037459	Factor4	-1.74452	lncRNA_PBL
TCONS_00072040	Factor4	-1.74724	lncRNA_PBL
TCONS_00118706	Factor4	-1.7515	lncRNA_PBL
TCONS_00043927	Factor4	-1.75361	lncRNA_PBL
TCONS_00090913	Factor4	-1.75422	lncRNA_PBL
TCONS_00035042	Factor4	-1.76377	lncRNA_PBL
TCONS_00112226	Factor4	-1.77055	lncRNA_PBL
TCONS_00029252	Factor4	-1.77705	lncRNA_PBL
TCONS_00113085	Factor4	-1.77996	lncRNA_PBL
TCONS_00146868	Factor4	-1.78172	lncRNA_PBL
TCONS_00039443	Factor4	-1.78322	lncRNA_PBL
TCONS_00128659	Factor4	-1.78407	lncRNA_PBL
TCONS_00093296	Factor4	-1.79236	lncRNA_PBL
TCONS_00007128	Factor4	-1.79693	lncRNA_PBL
TCONS_00025478	Factor4	-1.79752	lncRNA_PBL
TCONS_00109315	Factor4	-1.80443	lncRNA_PBL
TCONS_00044724	Factor4	-1.8136	lncRNA_PBL
TCONS_00023130	Factor4	-1.8254	lncRNA_PBL
TCONS_00032872	Factor4	-1.84339	FT_PBL_lncRNAcorrelation
TCONS_00105984	Factor4	-1.85194	lncRNA_PBL
TCONS_00080149	Factor4	-1.85434	lncRNA_PBL
TCONS_00023517	Factor4	-1.85872	lncRNA_PBL
TCONS_00007508	Factor4	-1.86079	lncRNA_PBL
TCONS_00041929	Factor4	-1.87052	lncRNA_PBL
TCONS_00005428	Factor4	-1.87792	lncRNA_PBL
TCONS_00114690	Factor4	-1.88393	lncRNA_PBL
TCONS_00150125	Factor4	-1.88862	lncRNA_PBL
TCONS_00045081	Factor4	-1.89172	lncRNA_PBL
TCONS_00073168	Factor4	-1.89324	lncRNA_PBL
TCONS_00111997	Factor4	-1.89355	lncRNA_PBL
TCONS_00096472	Factor4	-1.90001	lncRNA_PBL
TCONS_00040454	Factor4	-1.90388	FT_PBL_lncRNAcorrelation
ENSBTAT00000043202	Factor4	-1.90688	FT_PBL_mRNAcorrelation
TCONS_00067988	Factor4	-1.90856	lncRNA_PBL
TCONS_00132026	Factor4	-1.9105	lncRNA_PBL
TCONS_00128548	Factor4	-1.91308	lncRNA_PBL
TCONS_00064302	Factor4	-1.92274	lncRNA_PBL
TCONS_00110636	Factor4	-1.92291	lncRNA_PBL
TCONS_00028865	Factor4	-1.92435	lncRNA_PBL
TCONS_00015791	Factor4	-1.96255	lncRNA_PBL
TCONS_00071505	Factor4	-1.967	lncRNA_PBL
TCONS_00033669	Factor4	-1.97262	lncRNA_PBL
TCONS_00136419	Factor4	-1.97436	lncRNA_PBL
TCONS_00024158	Factor4	-1.98801	lncRNA_PBL
TCONS_00149669	Factor4	-1.99582	lncRNA_PBL
TCONS_00044081	Factor4	-2.00624	lncRNA_PBL
TCONS_00012685	Factor4	-2.01684	lncRNA_PBL
TCONS_00083625	Factor4	-2.02265	lncRNA_PBL
TCONS_00003323	Factor4	-2.0247	lncRNA_PBL
ENSBTAT00000083717	Factor4	-2.03342	FT_PBL_mRNAcorrelation
TCONS_00097744	Factor4	-2.04831	lncRNA_PBL
TCONS_00138547	Factor4	-2.05619	lncRNA_PBL
TCONS_00124396	Factor4	-2.06645	lncRNA_PBL
TCONS_00087318	Factor4	-2.06763	lncRNA_PBL
TCONS_00099562	Factor4	-2.06919	lncRNA_PBL
TCONS_00037360	Factor4	-2.0722	lncRNA_PBL
ENSBTAT00000078457	Factor4	-2.08271	FT_PBL_mRNAcorrelation
ENSBTAT00000046968	Factor4	-2.08271	FT_PBL_mRNAcorrelation
ENSBTAT00000077777	Factor4	-2.08271	FT_PBL_mRNAcorrelation
ENSBTAT00000075960	Factor4	-2.08271	FT_PBL_mRNAcorrelation
TCONS_00109776	Factor4	-2.08503	lncRNA_PBL
TCONS_00115456	Factor4	-2.0895	lncRNA_PBL
TCONS_00123915	Factor4	-2.09932	lncRNA_PBL
TCONS_00071670	Factor4	-2.1042	lncRNA_PBL
TCONS_00007986	Factor4	-2.10517	lncRNA_PBL
TCONS_00071609	Factor4	-2.12016	lncRNA_PBL
TCONS_00124373	Factor4	-2.12148	lncRNA_PBL
TCONS_00135417	Factor4	-2.13017	lncRNA_PBL
TCONS_00118014	Factor4	-2.13026	lncRNA_PBL
TCONS_00043056	Factor4	-2.13254	lncRNA_PBL
TCONS_00085603	Factor4	-2.13389	lncRNA_PBL
TCONS_00088948	Factor4	-2.1567	lncRNA_PBL
TCONS_00093114	Factor4	-2.16175	lncRNA_PBL
TCONS_00057385	Factor4	-2.1635	lncRNA_PBL
TCONS_00025033	Factor4	-2.16524	lncRNA_PBL
TCONS_00137976	Factor4	-2.16828	lncRNA_PBL
TCONS_00117799	Factor4	-2.16897	lncRNA_PBL
TCONS_00031226	Factor4	-2.17256	lncRNA_PBL
TCONS_00148062	Factor4	-2.18996	lncRNA_PBL
TCONS_00005544	Factor4	-2.19979	lncRNA_PBL
TCONS_00043403	Factor4	-2.20837	lncRNA_PBL
TCONS_00078477	Factor4	-2.21333	lncRNA_PBL
TCONS_00040754	Factor4	-2.22776	lncRNA_PBL
ENSBTAT00000005688	Factor4	-2.22805	FT_PBL_mRNAcorrelation
TCONS_00100963	Factor4	-2.2296	lncRNA_PBL
TCONS_00124163	Factor4	-2.23644	lncRNA_PBL
TCONS_00025821	Factor4	-2.24863	lncRNA_PBL
TCONS_00022484	Factor4	-2.24944	lncRNA_PBL
TCONS_00014346	Factor4	-2.25428	lncRNA_PBL
TCONS_00146997	Factor4	-2.25536	lncRNA_PBL
TCONS_00123091	Factor4	-2.25539	lncRNA_PBL
TCONS_00110298	Factor4	-2.26351	lncRNA_PBL
TCONS_00009547	Factor4	-2.26447	lncRNA_PBL
TCONS_00034005	Factor4	-2.29316	lncRNA_PBL
TCONS_00147003	Factor4	-2.30084	lncRNA_PBL
TCONS_00005359	Factor4	-2.30189	lncRNA_PBL
TCONS_00111824	Factor4	-2.30269	lncRNA_PBL
TCONS_00041503	Factor4	-2.30384	lncRNA_PBL
TCONS_00082299	Factor4	-2.32073	lncRNA_PBL
TCONS_00027243	Factor4	-2.32242	lncRNA_PBL
TCONS_00114484	Factor4	-2.32791	lncRNA_PBL
TCONS_00059778	Factor4	-2.34251	lncRNA_PBL
TCONS_00161090	Factor4	-2.34644	lncRNA_PBL
TCONS_00121664	Factor4	-2.35115	lncRNA_PBL
TCONS_00126592	Factor4	-2.35578	lncRNA_PBL
TCONS_00093172	Factor4	-2.35955	lncRNA_PBL
TCONS_00044700	Factor4	-2.36016	lncRNA_PBL
TCONS_00009730	Factor4	-2.36024	lncRNA_PBL
TCONS_00043652	Factor4	-2.36026	lncRNA_PBL
TCONS_00078999	Factor4	-2.36705	lncRNA_PBL
TCONS_00049611	Factor4	-2.3712	lncRNA_PBL
TCONS_00071074	Factor4	-2.37745	lncRNA_PBL
TCONS_00052337	Factor4	-2.40501	lncRNA_PBL
TCONS_00050205	Factor4	-2.40698	lncRNA_PBL
TCONS_00104487	Factor4	-2.41648	lncRNA_PBL
TCONS_00018621	Factor4	-2.41701	lncRNA_PBL
TCONS_00156653	Factor4	-2.45394	lncRNA_PBL
TCONS_00010610	Factor4	-2.45783	lncRNA_PBL
TCONS_00089197	Factor4	-2.46613	lncRNA_PBL
TCONS_00003281	Factor4	-2.46836	lncRNA_PBL
TCONS_00146814	Factor4	-2.46991	lncRNA_PBL
TCONS_00002454	Factor4	-2.47638	lncRNA_PBL
TCONS_00069315	Factor4	-2.48228	lncRNA_PBL
TCONS_00059146	Factor4	-2.48277	lncRNA_PBL
TCONS_00110966	Factor4	-2.48642	lncRNA_PBL
TCONS_00047221	Factor4	-2.49218	lncRNA_PBL
TCONS_00091421	Factor4	-2.50063	FT_PBL_lncRNAcorrelation
TCONS_00144544	Factor4	-2.50126	lncRNA_PBL
TCONS_00019398	Factor4	-2.51167	lncRNA_PBL
TCONS_00067543	Factor4	-2.51741	lncRNA_PBL
TCONS_00158108	Factor4	-2.52243	lncRNA_PBL
TCONS_00025259	Factor4	-2.52651	lncRNA_PBL
TCONS_00047197	Factor4	-2.53608	lncRNA_PBL
TCONS_00003871	Factor4	-2.53898	lncRNA_PBL
TCONS_00073918	Factor4	-2.54227	lncRNA_PBL
TCONS_00013452	Factor4	-2.54784	lncRNA_PBL
TCONS_00031952	Factor4	-2.54796	lncRNA_PBL
TCONS_00003603	Factor4	-2.55495	lncRNA_PBL
TCONS_00162230	Factor4	-2.56037	lncRNA_PBL
TCONS_00108707	Factor4	-2.57273	lncRNA_PBL
TCONS_00118611	Factor4	-2.57691	lncRNA_PBL
TCONS_00136245	Factor4	-2.5948	lncRNA_PBL
TCONS_00094359	Factor4	-2.61266	lncRNA_PBL
TCONS_00040388	Factor4	-2.61794	lncRNA_PBL
TCONS_00058432	Factor4	-2.62365	lncRNA_PBL
TCONS_00068414	Factor4	-2.62371	lncRNA_PBL
TCONS_00114337	Factor4	-2.63115	lncRNA_PBL
TCONS_00063877	Factor4	-2.63401	lncRNA_PBL
TCONS_00039450	Factor4	-2.64142	lncRNA_PBL
ENSBTAT00000065982	Factor4	-2.65741	FT_PBL_mRNAcorrelation
TCONS_00107589	Factor4	-2.65816	lncRNA_PBL
TCONS_00104303	Factor4	-2.66311	lncRNA_PBL
TCONS_00030723	Factor4	-2.66552	lncRNA_PBL
TCONS_00109483	Factor4	-2.6695	lncRNA_PBL
TCONS_00097366	Factor4	-2.67132	lncRNA_PBL
TCONS_00098510	Factor4	-2.68873	lncRNA_PBL
TCONS_00121096	Factor4	-2.69061	lncRNA_PBL
TCONS_00148959	Factor4	-2.70094	lncRNA_PBL
TCONS_00080822	Factor4	-2.74668	lncRNA_PBL
TCONS_00002956	Factor4	-2.74893	lncRNA_PBL
TCONS_00141462	Factor4	-2.76923	lncRNA_PBL
TCONS_00011728	Factor4	-2.77173	lncRNA_PBL
TCONS_00025086	Factor4	-2.78765	lncRNA_PBL
TCONS_00144472	Factor4	-2.79453	lncRNA_PBL
TCONS_00007964	Factor4	-2.79692	lncRNA_PBL
TCONS_00093045	Factor4	-2.8035	lncRNA_PBL
TCONS_00053925	Factor4	-2.81323	lncRNA_PBL
TCONS_00101308	Factor4	-2.88829	lncRNA_PBL
TCONS_00047926	Factor4	-2.90495	lncRNA_PBL
TCONS_00019768	Factor4	-2.91629	lncRNA_PBL
TCONS_00109577	Factor4	-2.92718	lncRNA_PBL
TCONS_00004001	Factor4	-2.93083	lncRNA_PBL
TCONS_00035173	Factor4	-2.9331	FT_PBL_lncRNAcorrelation
TCONS_00111816	Factor4	-2.93354	lncRNA_PBL
TCONS_00126680	Factor4	-2.93518	lncRNA_PBL
TCONS_00143720	Factor4	-2.93952	lncRNA_PBL
TCONS_00159143	Factor4	-2.94597	lncRNA_PBL
TCONS_00012365	Factor4	-2.94799	lncRNA_PBL
TCONS_00080819	Factor4	-2.95373	lncRNA_PBL
TCONS_00059797	Factor4	-2.95671	lncRNA_PBL
TCONS_00127345	Factor4	-2.9672	lncRNA_PBL
TCONS_00032719	Factor4	-2.98065	lncRNA_PBL
TCONS_00071923	Factor4	-3.00131	lncRNA_PBL
TCONS_00067013	Factor4	-3.02733	lncRNA_PBL
TCONS_00071908	Factor4	-3.03434	lncRNA_PBL
TCONS_00131213	Factor4	-3.04099	lncRNA_PBL
TCONS_00043604	Factor4	-3.05272	lncRNA_PBL
TCONS_00037904	Factor4	-3.05406	lncRNA_PBL
TCONS_00079260	Factor4	-3.05818	lncRNA_PBL
TCONS_00115576	Factor4	-3.06195	lncRNA_PBL
TCONS_00048652	Factor4	-3.0749	lncRNA_PBL
TCONS_00060930	Factor4	-3.08063	lncRNA_PBL
TCONS_00142960	Factor4	-3.08334	lncRNA_PBL
TCONS_00063714	Factor4	-3.10935	lncRNA_PBL
TCONS_00125883	Factor4	-3.13808	lncRNA_PBL
TCONS_00028478	Factor4	-3.16231	lncRNA_PBL
TCONS_00007361	Factor4	-3.16408	lncRNA_PBL
TCONS_00002327	Factor4	-3.16992	lncRNA_PBL
TCONS_00024798	Factor4	-3.17599	lncRNA_PBL
TCONS_00148176	Factor4	-3.18146	lncRNA_PBL
TCONS_00012654	Factor4	-3.18831	lncRNA_PBL
TCONS_00081630	Factor4	-3.1962	lncRNA_PBL
TCONS_00162564	Factor4	-3.20184	lncRNA_PBL
TCONS_00028425	Factor4	-3.21158	lncRNA_PBL
TCONS_00099631	Factor4	-3.21158	lncRNA_PBL
TCONS_00078266	Factor4	-3.21865	lncRNA_PBL
TCONS_00125076	Factor4	-3.26786	lncRNA_PBL
TCONS_00004861	Factor4	-3.27913	lncRNA_PBL
TCONS_00158516	Factor4	-3.29858	lncRNA_PBL
TCONS_00100302	Factor4	-3.30856	lncRNA_PBL
TCONS_00004481	Factor4	-3.34316	lncRNA_PBL
TCONS_00044918	Factor4	-3.3547	lncRNA_PBL
TCONS_00108100	Factor4	-3.35719	lncRNA_PBL
TCONS_00143392	Factor4	-3.35802	lncRNA_PBL
TCONS_00073244	Factor4	-3.36838	lncRNA_PBL
TCONS_00067525	Factor4	-3.40149	lncRNA_PBL
TCONS_00069695	Factor4	-3.40988	lncRNA_PBL
TCONS_00066154	Factor4	-3.4182	lncRNA_PBL
TCONS_00074626	Factor4	-3.43348	lncRNA_PBL
TCONS_00098807	Factor4	-3.47904	lncRNA_PBL
TCONS_00006075	Factor4	-3.48344	lncRNA_PBL
XLOC_045577	Factor4	-3.52564	correlated_lncRNA
TCONS_00130425	Factor4	-3.52937	lncRNA_PBL
TCONS_00033018	Factor4	-3.53515	lncRNA_PBL
TCONS_00011293	Factor4	-3.53601	lncRNA_PBL
TCONS_00026236	Factor4	-3.53739	lncRNA_PBL
TCONS_00033271	Factor4	-3.60359	lncRNA_PBL
TCONS_00128101	Factor4	-3.61266	lncRNA_PBL
TCONS_00117613	Factor4	-3.66155	lncRNA_PBL
TCONS_00041068	Factor4	-3.68073	lncRNA_PBL
XLOC_084963	Factor4	-3.71787	correlated_lncRNA
TCONS_00116487	Factor4	-3.73819	lncRNA_PBL
TCONS_00161983	Factor4	-3.75156	lncRNA_PBL
TCONS_00068231	Factor4	-3.76314	lncRNA_PBL
TCONS_00069134	Factor4	-3.77246	lncRNA_PBL
TCONS_00006857	Factor4	-3.82984	lncRNA_PBL
TCONS_00061739	Factor4	-3.86512	lncRNA_PBL
TCONS_00109631	Factor4	-3.89299	lncRNA_PBL
TCONS_00131998	Factor4	-3.93169	lncRNA_PBL
TCONS_00125227	Factor4	-3.98208	lncRNA_PBL
TCONS_00002331	Factor4	-4.01001	lncRNA_PBL
TCONS_00034727	Factor4	-4.01619	lncRNA_PBL
TCONS_00088566	Factor4	-4.04938	lncRNA_PBL
XLOC_039281	Factor4	-4.04959	correlated_lncRNA
TCONS_00028767	Factor4	-4.19269	lncRNA_PBL
TCONS_00002357	Factor4	-4.21045	lncRNA_PBL
TCONS_00044688	Factor4	-4.28062	lncRNA_PBL
TCONS_00126920	Factor4	-4.30015	lncRNA_PBL
TCONS_00025031	Factor4	-4.32602	lncRNA_PBL
TCONS_00104316	Factor4	-4.33674	lncRNA_PBL
TCONS_00130993	Factor4	-4.34493	lncRNA_PBL
TCONS_00137018	Factor4	-4.50662	lncRNA_PBL
TCONS_00084866	Factor4	-4.54305	lncRNA_PBL
TCONS_00159371	Factor4	-4.61157	lncRNA_PBL
TCONS_00088237	Factor4	-4.67703	lncRNA_PBL
TCONS_00007482	Factor4	-4.7773	lncRNA_PBL
TCONS_00062541	Factor4	-4.85997	lncRNA_PBL
TCONS_00100704	Factor4	-4.87751	lncRNA_PBL
TCONS_00018424	Factor4	-4.94714	lncRNA_PBL
TCONS_00079253	Factor4	-5.0328	lncRNA_PBL
TCONS_00149538	Factor4	-5.45774	lncRNA_PBL
TCONS_00002376	Factor4	-5.60258	lncRNA_PBL
TCONS_00098519	Factor4	-5.63856	lncRNA_PBL
TCONS_00043426	Factor4	-5.8983	lncRNA_PBL
TCONS_00115477	Factor4	-6.01773	lncRNA_PBL
XLOC_018155	Factor4	-6.13475	correlated_lncRNA
TCONS_00115061	Factor4	-6.43726	lncRNA_PBL
TCONS_00075050	Factor4	-6.6062	lncRNA_PBL
XLOC_041441	Factor4	-6.81459	correlated_lncRNA
TCONS_00118023	Factor4	-7.27942	lncRNA_PBL
TCONS_00091420	Factor4	-7.34866	FT_PBL_lncRNAcorrelation

## Sheet: MOFA-Combined
feature	factor	value	view
ENSBTAT00000035434	Factor4	27.4355	mRNA_PBL
ENSBTAT00000003804	Factor4	16.2337	mRNA_PBL
ENSBTAT00000087300	Factor4	16.2337	mRNA_PBL
ENSBTAT00000082189	Factor4	12.773	mRNA_PBL
ENSBTAT00000025774	Factor4	12.773	mRNA_PBL
ENSBTAT00000019004	Factor4	11.9042	FT_PBL_mRNAcorrelation
ENSBTAT00000064111	Factor4	10.2836	mRNA_PBL
ENSBTAT00000069144	Factor4	8.0147	mRNA_PBL
ENSBTAT00000077014	Factor4	8.0147	mRNA_PBL
ENSBTAT00000017256	Factor4	6.09008	FT_PBL_mRNAcorrelation
TCONS_00002262	Factor4	5.36418	lncRNA_PBL
TCONS_00013660	Factor4	5.3348	lncRNA_PBL
TCONS_00051773	Factor4	5.00868	lncRNA_PBL
TCONS_00065937	Factor4	4.99585	lncRNA_PBL
ENSBTAT00000080742	Factor4	4.91838	mRNA_PBL
ENSBTAT00000053470	Factor4	4.80505	mRNA_PBL
ENSBTAT00000025695	Factor4	4.70523	mRNA_PBL
ENSBTAT00000083411	Factor4	4.70523	mRNA_PBL
TCONS_00088974	Factor4	4.48987	lncRNA_PBL
TCONS_00081060	Factor4	4.41286	lncRNA_PBL
TCONS_00141184	Factor4	4.33219	lncRNA_PBL
TCONS_00034011	Factor4	4.28918	lncRNA_PBL
TCONS_00140301	Factor4	4.2326	lncRNA_PBL
TCONS_00049650	Factor4	4.17627	lncRNA_PBL
ENSBTAT00000085213	Factor4	4.17318	mRNA_PBL
TCONS_00070633	Factor4	4.1468	lncRNA_PBL
TCONS_00084490	Factor4	4.13166	lncRNA_PBL
TCONS_00039268	Factor4	4.02178	lncRNA_PBL
TCONS_00051769	Factor4	3.97911	lncRNA_PBL
TCONS_00140039	Factor4	3.85856	lncRNA_PBL
TCONS_00071825	Factor4	3.80234	lncRNA_PBL
TCONS_00010834	Factor4	3.75072	lncRNA_PBL
TCONS_00122989	Factor4	3.72377	lncRNA_PBL
ENSBTAT00000061304	Factor4	3.69841	FT_PBL_mRNAcorrelation
ENSBTAT00000085453	Factor4	3.69841	FT_PBL_mRNAcorrelation
TCONS_00030136	Factor4	3.63708	lncRNA_PBL
TCONS_00027550	Factor4	3.62917	lncRNA_PBL
TCONS_00128359	Factor4	3.5726	lncRNA_PBL
TCONS_00100253	Factor4	3.51853	lncRNA_PBL
TCONS_00072147	Factor4	3.48367	lncRNA_PBL
TCONS_00024048	Factor4	3.45946	lncRNA_PBL
TCONS_00060878	Factor4	3.43586	lncRNA_PBL
TCONS_00045427	Factor4	3.43383	lncRNA_PBL
TCONS_00067705	Factor4	3.43141	lncRNA_PBL
TCONS_00144915	Factor4	3.38245	lncRNA_PBL
TCONS_00003214	Factor4	3.371	lncRNA_PBL
TCONS_00113279	Factor4	3.34774	lncRNA_PBL
TCONS_00013309	Factor4	3.31166	lncRNA_PBL
TCONS_00139113	Factor4	3.29577	lncRNA_PBL
TCONS_00147050	Factor4	3.28516	lncRNA_PBL
TCONS_00053327	Factor4	3.27503	lncRNA_PBL
TCONS_00013623	Factor4	3.21501	lncRNA_PBL
TCONS_00113050	Factor4	3.19973	lncRNA_PBL
TCONS_00083909	Factor4	3.18941	lncRNA_PBL
TCONS_00083908	Factor4	3.18941	lncRNA_PBL
TCONS_00077887	Factor4	3.16252	lncRNA_PBL
ENSBTAT00000004070	Factor4	3.131	FT_PBL_mRNAcorrelation
TCONS_00114073	Factor4	3.09414	lncRNA_PBL
TCONS_00037182	Factor4	3.08037	lncRNA_PBL
TCONS_00089687	Factor4	3.0486	lncRNA_PBL
TCONS_00053319	Factor4	3.01554	lncRNA_PBL
TCONS_00033687	Factor4	3.00207	lncRNA_PBL
TCONS_00132364	Factor4	3.00114	lncRNA_PBL
TCONS_00099535	Factor4	2.99903	lncRNA_PBL
TCONS_00020762	Factor4	2.98052	lncRNA_PBL
TCONS_00038909	Factor4	2.97639	lncRNA_PBL
TCONS_00124458	Factor4	2.95165	lncRNA_PBL
TCONS_00032149	Factor4	2.95021	lncRNA_PBL
TCONS_00122236	Factor4	2.94894	lncRNA_PBL
TCONS_00140110	Factor4	2.91066	lncRNA_PBL
TCONS_00086061	Factor4	2.89393	lncRNA_PBL
TCONS_00008672	Factor4	2.88357	lncRNA_PBL
TCONS_00143465	Factor4	2.87007	lncRNA_PBL
TCONS_00114460	Factor4	2.77777	lncRNA_PBL
TCONS_00034783	Factor4	2.73467	lncRNA_PBL
TCONS_00138912	Factor4	2.70159	lncRNA_PBL
ENSBTAT00000052672	Factor4	2.69807	FT_PBL_mRNAcorrelation
TCONS_00084445	Factor4	2.67858	lncRNA_PBL
TCONS_00140582	Factor4	2.67671	lncRNA_PBL
TCONS_00057149	Factor4	2.65661	lncRNA_PBL
TCONS_00037237	Factor4	2.5903	lncRNA_PBL
TCONS_00054079	Factor4	2.58029	lncRNA_PBL
TCONS_00018775	Factor4	2.55399	lncRNA_PBL
TCONS_00117942	Factor4	2.5248	lncRNA_PBL
TCONS_00117941	Factor4	2.5248	lncRNA_PBL
TCONS_00073102	Factor4	2.50768	lncRNA_PBL
TCONS_00089321	Factor4	2.50674	lncRNA_PBL
TCONS_00051139	Factor4	2.48387	lncRNA_PBL
TCONS_00053947	Factor4	2.45377	lncRNA_PBL
TCONS_00135474	Factor4	2.4514	lncRNA_PBL
TCONS_00059251	Factor4	2.45006	lncRNA_PBL
TCONS_00150759	Factor4	2.43181	lncRNA_PBL
TCONS_00080466	Factor4	2.431	lncRNA_PBL
TCONS_00129100	Factor4	2.43016	lncRNA_PBL
TCONS_00129728	Factor4	2.42851	lncRNA_PBL
TCONS_00028906	Factor4	2.42558	lncRNA_PBL
ENSBTAT00000083222	Factor4	2.36915	FT_PBL_mRNAcorrelation
ENSBTAT00000022655	Factor4	2.36915	FT_PBL_mRNAcorrelation
ENSBTAT00000073576	Factor4	2.36915	FT_PBL_mRNAcorrelation
TCONS_00004946	Factor4	2.3592	lncRNA_PBL
TCONS_00021816	Factor4	2.3455	lncRNA_PBL
TCONS_00044804	Factor4	2.32575	lncRNA_PBL
ENSBTAT00000002039	Factor4	2.32306	FT_PBL_mRNAcorrelation
TCONS_00026597	Factor4	2.31765	lncRNA_PBL
TCONS_00093702	Factor4	2.31671	lncRNA_PBL
TCONS_00135462	Factor4	2.29656	lncRNA_PBL
TCONS_00025055	Factor4	2.25766	lncRNA_PBL
TCONS_00013883	Factor4	2.22718	lncRNA_PBL
TCONS_00147011	Factor4	2.22597	lncRNA_PBL
TCONS_00066181	Factor4	2.22244	lncRNA_PBL
TCONS_00042366	Factor4	2.21641	lncRNA_PBL
TCONS_00090685	Factor4	2.20374	lncRNA_PBL
TCONS_00102562	Factor4	2.20049	lncRNA_PBL
TCONS_00050643	Factor4	2.17994	lncRNA_PBL
TCONS_00087090	Factor4	2.17421	lncRNA_PBL
TCONS_00110040	Factor4	2.1651	lncRNA_PBL
TCONS_00130788	Factor4	2.1616	lncRNA_PBL
ENSBTAT00000083724	Factor4	2.15517	FT_PBL_mRNAcorrelation
TCONS_00059047	Factor4	2.14973	lncRNA_PBL
TCONS_00059048	Factor4	2.14973	lncRNA_PBL
TCONS_00091835	Factor4	2.14299	lncRNA_PBL
TCONS_00128888	Factor4	2.13784	lncRNA_PBL
TCONS_00078300	Factor4	2.12209	lncRNA_PBL
TCONS_00018793	Factor4	2.1199	lncRNA_PBL
TCONS_00022174	Factor4	2.10775	lncRNA_PBL
TCONS_00065998	Factor4	2.10463	lncRNA_PBL
TCONS_00027755	Factor4	2.0993	lncRNA_PBL
TCONS_00137165	Factor4	2.09413	lncRNA_PBL
TCONS_00085324	Factor4	2.08341	lncRNA_PBL
TCONS_00112235	Factor4	2.08143	lncRNA_PBL
ENSBTAT00000028899	Factor4	2.05777	FT_PBL_mRNAcorrelation
TCONS_00150250	Factor4	2.04775	lncRNA_PBL
TCONS_00123899	Factor4	2.03995	lncRNA_PBL
TCONS_00134577	Factor4	2.03352	lncRNA_PBL
TCONS_00106746	Factor4	2.03313	lncRNA_PBL
TCONS_00059054	Factor4	2.03312	lncRNA_PBL
TCONS_00101873	Factor4	2.02407	lncRNA_PBL
TCONS_00093294	Factor4	2.01813	lncRNA_PBL
TCONS_00047103	Factor4	2.01737	lncRNA_PBL
TCONS_00107705	Factor4	2.01424	lncRNA_PBL
ENSBTAT00000015106	Factor4	2.00128	FT_PBL_mRNAcorrelation
TCONS_00079360	Factor4	1.9995	lncRNA_PBL
TCONS_00147714	Factor4	1.99782	lncRNA_PBL
TCONS_00151839	Factor4	1.99641	lncRNA_PBL
TCONS_00006988	Factor4	1.97672	lncRNA_PBL
ENSBTAT00000053458	Factor4	1.96876	FT_PBL_mRNAcorrelation
TCONS_00101306	Factor4	1.96299	lncRNA_PBL
TCONS_00029583	Factor4	1.9573	lncRNA_PBL
TCONS_00027938	Factor4	1.95643	lncRNA_PBL
TCONS_00072269	Factor4	1.95547	lncRNA_PBL
TCONS_00049289	Factor4	1.93554	lncRNA_PBL
TCONS_00031707	Factor4	1.93107	lncRNA_PBL
TCONS_00146063	Factor4	1.92886	lncRNA_PBL
TCONS_00081779	Factor4	1.91789	lncRNA_PBL
TCONS_00046496	Factor4	1.90976	lncRNA_PBL
TCONS_00150603	Factor4	1.90276	lncRNA_PBL
ENSBTAT00000038954	Factor4	1.87852	FT_PBL_mRNAcorrelation
TCONS_00027075	Factor4	1.81005	lncRNA_PBL
TCONS_00001857	Factor4	1.80613	lncRNA_PBL
TCONS_00115457	Factor4	1.79114	lncRNA_PBL
TCONS_00132488	Factor4	1.78798	lncRNA_PBL
TCONS_00109754	Factor4	1.78617	lncRNA_PBL
TCONS_00102615	Factor4	1.77808	lncRNA_PBL
TCONS_00107475	Factor4	1.74592	lncRNA_PBL
TCONS_00075341	Factor4	1.73318	lncRNA_PBL
ENSBTAT00000050790	Factor4	1.72095	FT_PBL_mRNAcorrelation
TCONS_00061446	Factor4	1.7208	lncRNA_PBL
TCONS_00150361	Factor4	1.71268	lncRNA_PBL
TCONS_00160157	Factor4	1.70791	lncRNA_PBL
TCONS_00031674	Factor4	1.70477	lncRNA_PBL
TCONS_00059399	Factor4	1.70044	lncRNA_PBL
TCONS_00006677	Factor4	1.68185	lncRNA_PBL
TCONS_00037152	Factor4	1.6449	lncRNA_PBL
TCONS_00029539	Factor4	1.64112	lncRNA_PBL
TCONS_00124968	Factor4	1.632	lncRNA_PBL
TCONS_00014063	Factor4	1.63139	lncRNA_PBL
TCONS_00040181	Factor4	1.62839	lncRNA_PBL
TCONS_00020843	Factor4	1.62506	lncRNA_PBL
TCONS_00000857	Factor4	1.62208	lncRNA_PBL
TCONS_00092232	Factor4	1.6001	lncRNA_PBL
TCONS_00095871	Factor4	1.59547	lncRNA_PBL
TCONS_00048886	Factor4	1.58534	lncRNA_PBL
ENSBTAT00000069816	Factor4	1.57648	FT_PBL_mRNAcorrelation
TCONS_00035527	Factor4	1.57254	lncRNA_PBL
TCONS_00161236	Factor4	1.56384	lncRNA_PBL
TCONS_00000008	Factor4	1.5623	FT_PBL_lncRNAcorrelation
TCONS_00116533	Factor4	1.54475	lncRNA_PBL
TCONS_00031413	Factor4	1.53493	lncRNA_PBL
TCONS_00095227	Factor4	1.53098	lncRNA_PBL
TCONS_00061941	Factor4	1.52312	lncRNA_PBL
TCONS_00032212	Factor4	1.52187	lncRNA_PBL
TCONS_00000555	Factor4	1.51823	lncRNA_PBL
TCONS_00162097	Factor4	1.50501	lncRNA_PBL
TCONS_00077360	Factor4	1.49058	lncRNA_PBL
TCONS_00114105	Factor4	1.48846	lncRNA_PBL
TCONS_00099398	Factor4	1.4765	lncRNA_PBL
TCONS_00028941	Factor4	1.46206	lncRNA_PBL
TCONS_00104480	Factor4	1.45315	lncRNA_PBL
TCONS_00158419	Factor4	1.44919	lncRNA_PBL
TCONS_00071488	Factor4	1.39206	lncRNA_PBL
TCONS_00027636	Factor4	1.35416	lncRNA_PBL
TCONS_00107719	Factor4	1.35005	lncRNA_PBL
TCONS_00001235	Factor4	1.33949	lncRNA_PBL
TCONS_00044240	Factor4	1.33926	lncRNA_PBL
TCONS_00069143	Factor4	1.33423	lncRNA_PBL
ENSBTAT00000026133	Factor4	1.33152	FT_PBL_mRNAcorrelation
TCONS_00039374	Factor4	1.32645	lncRNA_PBL
TCONS_00053339	Factor4	1.31884	lncRNA_PBL
TCONS_00079637	Factor4	1.31683	lncRNA_PBL
TCONS_00128139	Factor4	1.30695	lncRNA_PBL
TCONS_00128006	Factor4	1.30554	lncRNA_PBL
TCONS_00044773	Factor4	1.29847	lncRNA_PBL
TCONS_00108063	Factor4	1.297	lncRNA_PBL
TCONS_00147197	Factor4	1.29538	lncRNA_PBL
ENSBTAT00000079544	Factor4	1.29239	FT_PBL_mRNAcorrelation
ENSBTAT00000085181	Factor4	1.29239	FT_PBL_mRNAcorrelation
TCONS_00061984	Factor4	1.28651	lncRNA_PBL
TCONS_00106361	Factor4	1.28287	lncRNA_PBL
ENSBTAT00000020875_FT_PBL_mRNAcorrelation	Factor4	1.28208	FT_PBL_mRNAcorrelation
TCONS_00049340	Factor4	1.28186	lncRNA_PBL
TCONS_00079386	Factor4	1.27783	lncRNA_PBL
TCONS_00000106	Factor4	1.27199	lncRNA_PBL
TCONS_00089159	Factor4	1.24868	lncRNA_PBL
TCONS_00099738	Factor4	1.2484	lncRNA_PBL
ENSBTAT00000062847	Factor4	1.24827	FT_PBL_mRNAcorrelation
TCONS_00096065	Factor4	1.24817	lncRNA_PBL
TCONS_00119760	Factor4	1.23401	lncRNA_PBL
ENSBTAT00000014850	Factor4	1.23308	mRNA_PBL
TCONS_00107337	Factor4	1.2328	lncRNA_PBL
TCONS_00012329	Factor4	1.23196	lncRNA_PBL
TCONS_00042140	Factor4	1.22965	lncRNA_PBL
TCONS_00039148	Factor4	1.22913	lncRNA_PBL
TCONS_00135467	Factor4	1.2287	lncRNA_PBL
TCONS_00060829	Factor4	1.21706	lncRNA_PBL
TCONS_00144410	Factor4	1.21345	lncRNA_PBL
TCONS_00002309	Factor4	1.21311	lncRNA_PBL
TCONS_00025817	Factor4	1.20683	lncRNA_PBL
TCONS_00099736	Factor4	1.199	lncRNA_PBL
ENSBTAT00000080303_mRNA_PBL	Factor4	1.19734	mRNA_PBL
ENSBTAT00000079930	Factor4	1.19492	FT_PBL_mRNAcorrelation
TCONS_00132503	Factor4	1.19248	lncRNA_PBL
TCONS_00132701	Factor4	1.19008	lncRNA_PBL
TCONS_00019527	Factor4	1.18788	lncRNA_PBL
TCONS_00058090	Factor4	1.16917	lncRNA_PBL
TCONS_00014935	Factor4	1.16691	lncRNA_PBL
ENSBTAT00000001168	Factor4	1.15763	FT_PBL_mRNAcorrelation
TCONS_00119680	Factor4	1.14554	lncRNA_PBL
TCONS_00065080	Factor4	1.14444	lncRNA_PBL
TCONS_00011382	Factor4	1.13853	lncRNA_PBL
TCONS_00115802	Factor4	1.10936	lncRNA_PBL
TCONS_00065944	Factor4	1.10861	lncRNA_PBL
TCONS_00072208	Factor4	1.10667	lncRNA_PBL
TCONS_00118925	Factor4	1.10118	lncRNA_PBL
TCONS_00159188	Factor4	1.06933	lncRNA_PBL
TCONS_00099383	Factor4	1.05579	lncRNA_PBL
TCONS_00135115	Factor4	1.03576	lncRNA_PBL
TCONS_00080994	Factor4	1.0334	lncRNA_PBL
TCONS_00094215	Factor4	1.03186	lncRNA_PBL
TCONS_00143998	Factor4	1.02563	lncRNA_PBL
TCONS_00067109	Factor4	1.02353	lncRNA_PBL
TCONS_00111760	Factor4	1.01418	lncRNA_PBL
TCONS_00065755	Factor4	1.00397	FT_PBL_lncRNAcorrelation
TCONS_00057755	Factor4	1.00375	lncRNA_PBL
TCONS_00030372	Factor4	1.00345	lncRNA_PBL
TCONS_00000999	Factor4	0.984367	lncRNA_PBL
TCONS_00150653	Factor4	0.984358	lncRNA_PBL
TCONS_00091712	Factor4	0.979626	lncRNA_PBL
TCONS_00020772	Factor4	0.977587	lncRNA_PBL
TCONS_00142853	Factor4	0.972359	lncRNA_PBL
TCONS_00106299	Factor4	0.969622	lncRNA_PBL
ENSBTAT00000037226	Factor4	0.963129	FT_PBL_mRNAcorrelation
ENSBTAT00000067520	Factor4	0.963129	FT_PBL_mRNAcorrelation
TCONS_00039897	Factor4	0.963096	lncRNA_PBL
TCONS_00079454	Factor4	0.960056	lncRNA_PBL
ENSBTAT00000034158	Factor4	0.952236	FT_PBL_mRNAcorrelation
ENSBTAT00000080514	Factor4	0.952236	FT_PBL_mRNAcorrelation
TCONS_00117225	Factor4	0.949528	lncRNA_PBL
TCONS_00141975	Factor4	0.946111	lncRNA_PBL
TCONS_00014298	Factor4	0.945124	lncRNA_PBL
TCONS_00044759	Factor4	0.943642	lncRNA_PBL
TCONS_00068475	Factor4	0.937645	lncRNA_PBL
TCONS_00091221	Factor4	0.937085	FT_PBL_lncRNAcorrelation
TCONS_00025060	Factor4	0.934072	lncRNA_PBL
TCONS_00126758	Factor4	0.933779	lncRNA_PBL
TCONS_00058498	Factor4	0.922118	lncRNA_PBL
TCONS_00118958	Factor4	0.920194	lncRNA_PBL
TCONS_00061097	Factor4	0.906508	lncRNA_PBL
TCONS_00077787	Factor4	0.904426	lncRNA_PBL
ENSBTAT00000001866	Factor4	0.89791	FT_PBL_mRNAcorrelation
TCONS_00148366	Factor4	0.895465	lncRNA_PBL
ENSBTAT00000024083	Factor4	0.888674	FT_PBL_mRNAcorrelation
TCONS_00100025	Factor4	0.878718	lncRNA_PBL
TCONS_00011067	Factor4	0.878268	lncRNA_PBL
ENSBTAT00000052768	Factor4	0.877526	FT_PBL_mRNAcorrelation
TCONS_00084578	Factor4	0.870463	lncRNA_PBL
ENSBTAT00000081285	Factor4	0.867442	FT_PBL_mRNAcorrelation
TCONS_00018160	Factor4	0.857529	lncRNA_PBL
TCONS_00079446	Factor4	0.856239	lncRNA_PBL
TCONS_00047967	Factor4	0.839874	lncRNA_PBL
ENSBTAT00000079043	Factor4	0.834166	FT_PBL_mRNAcorrelation
ENSBTAT00000000588	Factor4	0.834166	FT_PBL_mRNAcorrelation
ENSBTAT00000082979	Factor4	0.834166	FT_PBL_mRNAcorrelation
TCONS_00160121	Factor4	0.829137	lncRNA_PBL
TCONS_00089054	Factor4	0.825621	lncRNA_PBL
TCONS_00090496	Factor4	0.823518	lncRNA_PBL
TCONS_00066009	Factor4	0.815303	lncRNA_PBL
TCONS_00158192	Factor4	0.813701	lncRNA_PBL
TCONS_00108200	Factor4	0.812815	lncRNA_PBL
TCONS_00108201	Factor4	0.812815	lncRNA_PBL
TCONS_00118033	Factor4	0.798104	lncRNA_PBL
TCONS_00102403	Factor4	0.796941	lncRNA_PBL
ENSBTAT00000009775	Factor4	0.795728	FT_PBL_mRNAcorrelation
ENSBTAT00000081861	Factor4	0.795728	FT_PBL_mRNAcorrelation
TCONS_00002647	Factor4	0.785469	lncRNA_PBL
TCONS_00083603	Factor4	0.780288	lncRNA_PBL
TCONS_00028099	Factor4	0.780129	lncRNA_PBL
TCONS_00111406	Factor4	0.779424	lncRNA_PBL
TCONS_00129036	Factor4	0.776891	lncRNA_PBL
TCONS_00013454	Factor4	0.772185	lncRNA_PBL
TCONS_00072155	Factor4	0.769393	lncRNA_PBL
TCONS_00114493	Factor4	0.766619	lncRNA_PBL
TCONS_00064985	Factor4	0.76503	lncRNA_PBL
TCONS_00091027	Factor4	0.762127	lncRNA_PBL
TCONS_00126359	Factor4	0.759398	lncRNA_PBL
TCONS_00026701	Factor4	0.757095	lncRNA_PBL
TCONS_00129859	Factor4	0.744449	lncRNA_PBL
TCONS_00027876	Factor4	0.738943	lncRNA_PBL
TCONS_00105872	Factor4	0.726078	lncRNA_PBL
TCONS_00069833	Factor4	0.708459	lncRNA_PBL
ENSBTAT00000043345	Factor4	0.704436	FT_PBL_mRNAcorrelation
XLOC_018904	Factor4	0.695618	correlated_lncRNA
XLOC_031565	Factor4	0.695618	correlated_lncRNA
TCONS_00036413	Factor4	0.695382	lncRNA_FT
TCONS_00061238	Factor4	0.695382	lncRNA_FT
TCONS_00124214	Factor4	0.692074	lncRNA_PBL
TCONS_00149517	Factor4	0.690875	lncRNA_PBL
TCONS_00077960	Factor4	0.690303	lncRNA_PBL
TCONS_00061414	Factor4	0.677863	lncRNA_PBL
TCONS_00143363	Factor4	0.676971	lncRNA_PBL
TCONS_00059163	Factor4	0.670226	lncRNA_PBL
TCONS_00132606	Factor4	0.660821	lncRNA_PBL
TCONS_00150158	Factor4	0.659887	lncRNA_PBL
TCONS_00138856	Factor4	0.654332	lncRNA_PBL
TCONS_00000003	Factor4	0.652982	FT_PBL_lncRNAcorrelation
TCONS_00025547	Factor4	0.644733	lncRNA_PBL
TCONS_00006756	Factor4	0.641824	lncRNA_FT
XLOC_003414	Factor4	0.632834	correlated_lncRNA
TCONS_00026475	Factor4	0.629215	lncRNA_PBL
TCONS_00080528	Factor4	0.627804	lncRNA_FT
TCONS_00136822	Factor4	0.620785	lncRNA_PBL
TCONS_00107701	Factor4	0.611575	lncRNA_PBL
TCONS_00112746	Factor4	0.600619	lncRNA_PBL
TCONS_00039272	Factor4	0.594815	lncRNA_FT
ENSBTAT00000027332	Factor4	0.586663	FT_PBL_mRNAcorrelation
TCONS_00002461	Factor4	0.586048	lncRNA_PBL
TCONS_00073771	Factor4	0.580921	lncRNA_PBL
TCONS_00127155	Factor4	0.573637	lncRNA_PBL
ENSBTAT00000056022	Factor4	0.570017	FT_PBL_mRNAcorrelation
TCONS_00053323	Factor4	0.561075	lncRNA_PBL
XLOC_024584	Factor4	0.556509	correlated_lncRNA
TCONS_00040516	Factor4	0.556464	lncRNA_FT
TCONS_00047365	Factor4	0.556464	lncRNA_FT
TCONS_00141226	Factor4	0.554095	lncRNA_PBL
ENSBTAT00000059107	Factor4	0.552688	FT_PBL_mRNAcorrelation
TCONS_00022689	Factor4	0.550325	lncRNA_PBL
TCONS_00086625	Factor4	0.550123	lncRNA_PBL
TCONS_00098114	Factor4	0.549739	lncRNA_PBL
ENSBTAT00000066791	Factor4	0.547365	FT_PBL_mRNAcorrelation
TCONS_00000001	Factor4	0.546317	FT_PBL_lncRNAcorrelation
TCONS_00130622	Factor4	0.545009	lncRNA_PBL
ENSBTAT00000015436	Factor4	0.542402	FT_PBL_mRNAcorrelation
ENSBTAT00000074459	Factor4	0.542402	FT_PBL_mRNAcorrelation
ENSBTAT00000049099	Factor4	0.533612	FT_PBL_mRNAcorrelation
TCONS_00129609	Factor4	0.531613	lncRNA_PBL
TCONS_00120821	Factor4	0.529848	lncRNA_PBL
TCONS_00118540	Factor4	0.525914	lncRNA_PBL
XLOC_042004	Factor4	0.521729	correlated_lncRNA
TCONS_00081264	Factor4	0.5217	lncRNA_FT
ENSBTAT00000064814	Factor4	0.521648	FT_PBL_mRNAcorrelation
XLOC_007102	Factor4	0.520849	correlated_lncRNA
TCONS_00047971	Factor4	0.520363	lncRNA_PBL
TCONS_00047981	Factor4	0.520363	lncRNA_PBL
TCONS_00013804	Factor4	0.520272	lncRNA_FT
TCONS_00067307	Factor4	0.5202	lncRNA_FT
ENSBTAT00000069520	Factor4	0.517352	FT_PBL_mRNAcorrelation
TCONS_00002650	Factor4	0.513328	lncRNA_PBL
TCONS_00107716	Factor4	0.511405	lncRNA_PBL
TCONS_00131063	Factor4	0.508836	lncRNA_PBL
XLOC_009264	Factor4	0.504693	correlated_lncRNA
TCONS_00017888	Factor4	0.501572	lncRNA_FT
TCONS_00010622	Factor4	0.497041	lncRNA_FT
TCONS_00098426	Factor4	0.496468	lncRNA_PBL
TCONS_00160581	Factor4	0.489362	lncRNA_PBL
XLOC_010130	Factor4	0.48695	correlated_lncRNA
TCONS_00019463	Factor4	0.486929	lncRNA_FT
XLOC_002835	Factor4	0.476812	correlated_lncRNA
TCONS_00099719	Factor4	0.473899	lncRNA_PBL
TCONS_00036139	Factor4	0.472542	lncRNA_PBL
TCONS_00147927	Factor4	0.469783	lncRNA_PBL
TCONS_00005559	Factor4	0.464416	lncRNA_FT
TCONS_00003283	Factor4	0.456749	lncRNA_PBL
TCONS_00000542	Factor4	0.448566	lncRNA_PBL
TCONS_00124355	Factor4	0.448046	lncRNA_PBL
ENSBTAT00000057294	Factor4	0.446834	FT_PBL_mRNAcorrelation
TCONS_00069340	Factor4	0.446225	lncRNA_PBL
ENSBTAT00000015116	Factor4	0.445751	FT_PBL_mRNAcorrelation
TCONS_00129425	Factor4	0.437573	lncRNA_PBL
ENSBTAT00000010501_FT_PBL_mRNAcorrelation	Factor4	0.43728	FT_PBL_mRNAcorrelation
TCONS_00004451	Factor4	0.43098	lncRNA_PBL
TCONS_00054613	Factor4	0.429939	lncRNA_PBL
TCONS_00099262	Factor4	0.422665	lncRNA_PBL
ENSBTAT00000024736	Factor4	0.420112	FT_PBL_mRNAcorrelation
ENSBTAT00000074659	Factor4	0.420112	FT_PBL_mRNAcorrelation
ENSBTAT00000074822	Factor4	0.420112	FT_PBL_mRNAcorrelation
TCONS_00030451	Factor4	0.418191	lncRNA_PBL
TCONS_00047585	Factor4	0.417577	lncRNA_PBL
TCONS_00056310	Factor4	0.417379	lncRNA_FT
TCONS_00062251	Factor4	0.407302	lncRNA_PBL
XLOC_000293	Factor4	0.405149	correlated_lncRNA
TCONS_00000507	Factor4	0.403281	lncRNA_FT
TCONS_00111985	Factor4	0.402746	lncRNA_PBL
XLOC_005470	Factor4	0.401245	correlated_lncRNA
TCONS_00010621	Factor4	0.401208	lncRNA_FT
ENSBTAT00000064018	Factor4	0.395464	FT_PBL_mRNAcorrelation
TCONS_00084421	Factor4	0.392788	lncRNA_PBL
TCONS_00020624	Factor4	0.391244	lncRNA_PBL
TCONS_00115429	Factor4	0.390335	lncRNA_PBL
TCONS_00081838	Factor4	0.384391	lncRNA_PBL
TCONS_00149998	Factor4	0.383509	lncRNA_PBL
XLOC_000438	Factor4	0.382609	correlated_lncRNA
TCONS_00000768	Factor4	0.382601	lncRNA_FT
TCONS_00081481	Factor4	0.382601	lncRNA_FT
XLOC_006918	Factor4	0.380524	correlated_lncRNA
ENSBTAT00000002422	Factor4	0.379957	FT_PBL_mRNAcorrelation
TCONS_00125778	Factor4	0.37632	lncRNA_PBL
TCONS_00061867	Factor4	0.372774	lncRNA_PBL
ENSBTAT00000008347	Factor4	0.372606	FT_PBL_mRNAcorrelation
TCONS_00013503	Factor4	0.372523	lncRNA_FT
TCONS_00039882	Factor4	0.36475	lncRNA_PBL
TCONS_00134691	Factor4	0.363384	lncRNA_PBL
TCONS_00054239	Factor4	0.362537	lncRNA_PBL
TCONS_00010967	Factor4	0.361737	lncRNA_FT
ENSBTAT00000047477	Factor4	0.360952	FT_PBL_mRNAcorrelation
TCONS_00143004	Factor4	0.360891	lncRNA_PBL
TCONS_00142996	Factor4	0.360891	lncRNA_PBL
XLOC_013169	Factor4	0.347828	correlated_lncRNA
XLOC_039169	Factor4	0.347828	correlated_lncRNA
TCONS_00036937	Factor4	0.347821	lncRNA_FT
TCONS_00025071	Factor4	0.347821	lncRNA_FT
TCONS_00075774	Factor4	0.347821	lncRNA_FT
ENSBTAT00000059490	Factor4	0.347001	mRNA_FT
TCONS_00024184	Factor4	0.345484	lncRNA_PBL
TCONS_00049360	Factor4	0.343941	lncRNA_PBL
TCONS_00031928	Factor4	0.341542	lncRNA_FT
TCONS_00041949	Factor4	0.339521	lncRNA_PBL
TCONS_00128769	Factor4	0.336116	lncRNA_PBL
ENSBTAT00000031917	Factor4	0.333995	FT_PBL_mRNAcorrelation
TCONS_00037665	Factor4	0.331963	lncRNA_PBL
TCONS_00020836	Factor4	0.321327	lncRNA_PBL
XLOC_006273	Factor4	0.319344	correlated_lncRNA
TCONS_00100846	Factor4	0.318857	lncRNA_PBL
TCONS_00100847	Factor4	0.318857	lncRNA_PBL
TCONS_00012161	Factor4	0.318772	lncRNA_FT
TCONS_00162376	Factor4	0.318176	lncRNA_PBL
TCONS_00043044	Factor4	0.315086	lncRNA_PBL
XLOC_023340	Factor4	0.313046	correlated_lncRNA
XLOC_023830	Factor4	0.313046	correlated_lncRNA
TCONS_00044868	Factor4	0.313041	lncRNA_FT
TCONS_00045857	Factor4	0.313041	lncRNA_FT
ENSBTAT00000062061	Factor4	0.311951	FT_PBL_mRNAcorrelation
TCONS_00089658	Factor4	0.311242	lncRNA_PBL
TCONS_00108415	Factor4	0.308235	lncRNA_PBL
ENSBTAT00000063670	Factor4	0.305604	FT_PBL_mRNAcorrelation
TCONS_00040867	Factor4	0.303735	lncRNA_FT
ENSBTAT00000065637	Factor4	0.298085	FT_PBL_mRNAcorrelation
TCONS_00051405	Factor4	0.297819	lncRNA_PBL
TCONS_00157780	Factor4	0.292791	lncRNA_PBL
TCONS_00030287	Factor4	0.282232	lncRNA_PBL
ENSBTAT00000065007	Factor4	0.280999	FT_PBL_mRNAcorrelation
TCONS_00158881	Factor4	0.279451	lncRNA_PBL
XLOC_038031	Factor4	0.278264	correlated_lncRNA
TCONS_00073640	Factor4	0.278261	lncRNA_FT
ENSBTAT00000043104	Factor4	0.277601	mRNA_FT
TCONS_00000569	Factor4	0.277552	lncRNA_PBL
TCONS_00141409	Factor4	0.277437	lncRNA_PBL
TCONS_00064319	Factor4	0.277168	lncRNA_PBL
TCONS_00064321	Factor4	0.277168	lncRNA_PBL
ENSBTAT00000072813	Factor4	0.273923	FT_PBL_mRNAcorrelation
ENSBTAT00000081770	Factor4	0.268426	FT_PBL_mRNAcorrelation
TCONS_00104429	Factor4	0.266007	lncRNA_PBL
TCONS_00148678	Factor4	0.265666	lncRNA_PBL
ENSBTAT00000054828	Factor4	0.263493	FT_PBL_mRNAcorrelation
TCONS_00142225	Factor4	0.263315	lncRNA_PBL
TCONS_00092963	Factor4	0.256505	lncRNA_PBL
TCONS_00001123	Factor4	0.249846	lncRNA_PBL
ENSBTAT00000010501_mRNA_FT	Factor4	0.242901	mRNA_FT
ENSBTAT00000059469	Factor4	0.242901	mRNA_FT
ENSBTAT00000060362_mRNA_FT	Factor4	0.242901	mRNA_FT
ENSBTAT00000081128	Factor4	0.242901	mRNA_FT
ENSBTAT00000031506	Factor4	0.242901	mRNA_FT
TCONS_00005980	Factor4	0.242337	lncRNA_PBL
TCONS_00096415	Factor4	0.240304	lncRNA_PBL
ENSBTAT00000072573	Factor4	0.234475	FT_PBL_mRNAcorrelation
TCONS_00113720	Factor4	0.230738	lncRNA_PBL
TCONS_00113721	Factor4	0.230738	lncRNA_PBL
XLOC_029340	Factor4	0.230675	correlated_lncRNA
TCONS_00025311	Factor4	0.229978	lncRNA_PBL
TCONS_00056733	Factor4	0.22977	lncRNA_FT
ENSBTAT00000082337	Factor4	0.223564	FT_PBL_mRNAcorrelation
ENSBTAT00000071867	Factor4	0.223564	FT_PBL_mRNAcorrelation
TCONS_00025659	Factor4	0.223384	lncRNA_PBL
TCONS_00147174	Factor4	0.216709	lncRNA_PBL
TCONS_00158973	Factor4	0.212686	lncRNA_PBL
TCONS_00050204	Factor4	0.212548	lncRNA_PBL
XLOC_000383	Factor4	0.208699	correlated_lncRNA
XLOC_029777	Factor4	0.208699	correlated_lncRNA
TCONS_00057677	Factor4	0.208697	lncRNA_FT
TCONS_00000689	Factor4	0.208697	lncRNA_FT
TCONS_00083411	Factor4	0.208697	lncRNA_FT
ENSBTAT00000065561	Factor4	0.208206	mRNA_FT
ENSBTAT00000020875_mRNA_FT	Factor4	0.208201	mRNA_FT
ENSBTAT00000037479	Factor4	0.208068	FT_PBL_mRNAcorrelation
ENSBTAT00000073077	Factor4	0.197934	FT_PBL_mRNAcorrelation
TCONS_00079854	Factor4	0.193993	lncRNA_PBL
TCONS_00091382	Factor4	0.190303	FT_PBL_lncRNAcorrelation
TCONS_00098437	Factor4	0.185762	lncRNA_PBL
TCONS_00032423	Factor4	0.18296	lncRNA_PBL
TCONS_00044935	Factor4	0.178525	lncRNA_PBL
TCONS_00025600	Factor4	0.175959	lncRNA_PBL
TCONS_00161612	Factor4	0.173129	lncRNA_PBL
ENSBTAT00000077906	Factor4	0.170798	FT_PBL_mRNAcorrelation
ENSBTAT00000052954	Factor4	0.165838	FT_PBL_mRNAcorrelation
TCONS_00147049	Factor4	0.160879	lncRNA_PBL
ENSBTAT00000060321	Factor4	0.158108	FT_PBL_mRNAcorrelation
ENSBTAT00000039965	Factor4	0.155597	FT_PBL_mRNAcorrelation
ENSBTAT00000081097	Factor4	0.153895	FT_PBL_mRNAcorrelation
ENSBTAT00000080499	Factor4	0.149042	FT_PBL_mRNAcorrelation
ENSBTAT00000084491	Factor4	0.149042	FT_PBL_mRNAcorrelation
ENSBTAT00000053675	Factor4	0.148522	mRNA_PBL
ENSBTAT00000063340	Factor4	0.1475	FT_PBL_mRNAcorrelation
ENSBTAT00000029203	Factor4	0.146076	FT_PBL_mRNAcorrelation
TCONS_00151843	Factor4	0.145984	lncRNA_PBL
TCONS_00056983	Factor4	0.142865	lncRNA_PBL
ENSBTAT00000017653	Factor4	0.140909	FT_PBL_mRNAcorrelation
ENSBTAT00000007549	Factor4	0.140466	FT_PBL_mRNAcorrelation
TCONS_00049332	Factor4	0.138515	lncRNA_PBL
TCONS_00120017	Factor4	0.138003	lncRNA_PBL
TCONS_00029101	Factor4	0.134648	lncRNA_PBL
TCONS_00091722	Factor4	0.130946	lncRNA_PBL
ENSBTAT00000051963	Factor4	0.129464	FT_PBL_mRNAcorrelation
ENSBTAT00000079690	Factor4	0.127498	FT_PBL_mRNAcorrelation
ENSBTAT00000083068	Factor4	0.127498	FT_PBL_mRNAcorrelation
TCONS_00119275	Factor4	0.125936	lncRNA_PBL
TCONS_00119274	Factor4	0.125936	lncRNA_PBL
TCONS_00076481	Factor4	0.123943	lncRNA_PBL
TCONS_00053526	Factor4	0.122852	lncRNA_PBL
ENSBTAT00000072711	Factor4	0.122263	FT_PBL_mRNAcorrelation
ENSBTAT00000005113	Factor4	0.122263	FT_PBL_mRNAcorrelation
ENSBTAT00000076760	Factor4	0.118541	FT_PBL_mRNAcorrelation
TCONS_00099798	Factor4	0.118237	lncRNA_PBL
TCONS_00099801	Factor4	0.118237	lncRNA_PBL
TCONS_00011287	Factor4	0.118153	lncRNA_PBL
XLOC_047940	Factor4	0.110275	correlated_lncRNA
TCONS_00018769	Factor4	0.109336	lncRNA_PBL
ENSBTAT00000075752	Factor4	0.109199	FT_PBL_mRNAcorrelation
ENSBTAT00000014592	Factor4	0.109199	FT_PBL_mRNAcorrelation
TCONS_00053343	Factor4	0.103191	lncRNA_PBL
TCONS_00053340	Factor4	0.103191	lncRNA_PBL
TCONS_00085329	Factor4	0.101404	FT_PBL_lncRNAcorrelation
TCONS_00024185	Factor4	0.100389	lncRNA_PBL
ENSBTAT00000084998	Factor4	0.0986931	FT_PBL_mRNAcorrelation
TCONS_00117932	Factor4	0.0873513	lncRNA_PBL
TCONS_00148695	Factor4	0.0869725	lncRNA_PBL
ENSBTAT00000060362_FT_PBL_mRNAcorrelation	Factor4	0.0863005	FT_PBL_mRNAcorrelation
ENSBTAT00000060087	Factor4	0.0862166	FT_PBL_mRNAcorrelation
TCONS_00071994	Factor4	0.0855243	lncRNA_PBL
TCONS_00109114	Factor4	0.0850991	lncRNA_PBL
ENSBTAT00000060911	Factor4	0.083825	FT_PBL_mRNAcorrelation
TCONS_00076893	Factor4	0.0778949	lncRNA_PBL
TCONS_00122628	Factor4	0.0774031	lncRNA_PBL
ENSBTAT00000054181	Factor4	0.0764647	FT_PBL_mRNAcorrelation
TCONS_00017045	Factor4	0.0754698	lncRNA_PBL
ENSBTAT00000047409	Factor4	0.0752244	FT_PBL_mRNAcorrelation
ENSBTAT00000002015	Factor4	0.0745212	FT_PBL_mRNAcorrelation
ENSBTAT00000055011	Factor4	0.0745212	FT_PBL_mRNAcorrelation
ENSBTAT00000045774	Factor4	0.0745212	FT_PBL_mRNAcorrelation
ENSBTAT00000083946	Factor4	0.0745212	FT_PBL_mRNAcorrelation
ENSBTAT00000065248	Factor4	0.0745212	FT_PBL_mRNAcorrelation
ENSBTAT00000082590	Factor4	0.0745212	FT_PBL_mRNAcorrelation
TCONS_00098408	Factor4	0.0742935	lncRNA_PBL
ENSBTAT00000061012	Factor4	0.0740288	FT_PBL_mRNAcorrelation
TCONS_00053364	Factor4	0.0732902	lncRNA_PBL
ENSBTAT00000007077	Factor4	0.0720506	FT_PBL_mRNAcorrelation
ENSBTAT00000012489	Factor4	0.0652107	FT_PBL_mRNAcorrelation
ENSBTAT00000071040	Factor4	0.0652107	FT_PBL_mRNAcorrelation
BovChr17Pos58946521	Factor4	0.0629721	Genomic
XLOC_092715	Factor4	0.059019	correlated_lncRNA
TCONS_00157201	Factor4	0.0570227	lncRNA_PBL
ENSBTAT00000017239	Factor4	0.0559085	FT_PBL_mRNAcorrelation
TCONS_00101476	Factor4	0.0558127	lncRNA_PBL
TCONS_00089040	Factor4	0.0540973	lncRNA_PBL
TCONS_00105960	Factor4	0.0535559	lncRNA_PBL
TCONS_00027632	Factor4	0.0533976	lncRNA_PBL
TCONS_00150484	Factor4	0.0531245	lncRNA_PBL
TCONS_00081142	Factor4	0.0507397	lncRNA_PBL
XLOC_031581	Factor4	0.0498016	correlated_lncRNA
XLOC_075685	Factor4	0.0481122	correlated_lncRNA
ENSBTAT00000080303_FT_PBL_mRNAcorrelation	Factor4	0.047313	FT_PBL_mRNAcorrelation
TCONS_00097540	Factor4	0.0461236	lncRNA_PBL
TCONS_00130592	Factor4	0.0400994	lncRNA_PBL
XLOC_023352	Factor4	0.0373398	correlated_lncRNA
TCONS_00139032	Factor4	0.0366945	lncRNA_PBL
ENSBTAT00000000191	Factor4	0.0366768	FT_PBL_mRNAcorrelation
TCONS_00149773	Factor4	0.0360127	lncRNA_PBL
XLOC_085854	Factor4	0.0353923	correlated_lncRNA
TCONS_00000029	Factor4	0.0352741	lncRNA_PBL
ENSBTAT00000062209	Factor4	0.0341378	FT_PBL_mRNAcorrelation
TCONS_00126884	Factor4	0.0326216	lncRNA_PBL
TCONS_00053403	Factor4	0.0318638	lncRNA_PBL
TCONS_00091422	Factor4	0.0318244	FT_PBL_lncRNAcorrelation
TCONS_00150856	Factor4	0.0317469	lncRNA_PBL
ENSBTAT00000004644	Factor4	0.0314079	FT_PBL_mRNAcorrelation
ENSBTAT00000081321	Factor4	0.0314079	FT_PBL_mRNAcorrelation
XLOC_017868	Factor4	0.0308098	correlated_lncRNA
TCONS_00033021	Factor4	0.0305518	lncRNA_PBL
BovChr14Pos80813248	Factor4	0.0300655	Genomic
TCONS_00019551	Factor4	0.0288105	lncRNA_PBL
XLOC_074088	Factor4	0.0287153	correlated_lncRNA
TCONS_00077528	Factor4	0.0283732	lncRNA_PBL
ENSBTAT00000014649	Factor4	0.0281243	FT_PBL_mRNAcorrelation
BovChr1Pos146497300	Factor4	0.0277258	Genomic
TCONS_00034754	Factor4	0.0273464	lncRNA_PBL
BovChr3Pos96202292	Factor4	0.0271519	Genomic
BovChr8Pos87245919	Factor4	0.026325	Genomic
BovChr3Pos88821997	Factor4	0.0253228	Genomic
BovChr5Pos89051206	Factor4	0.0250645	Genomic
XLOC_023276	Factor4	0.0250442	correlated_lncRNA
BovChr1Pos141365527	Factor4	0.0240831	Genomic
BovChr1Pos141793240	Factor4	0.0222174	Genomic
BovChr23Pos43909068	Factor4	0.0217145	Genomic
BovChr3Pos87458490	Factor4	0.0213419	Genomic
BovChr3Pos91549234	Factor4	0.0213419	Genomic
TCONS_00142368	Factor4	0.0210023	lncRNA_PBL
BovChr5Pos87901217	Factor4	0.0200113	Genomic
ENSBTAT00000030941	Factor4	0.0194797	FT_PBL_mRNAcorrelation
TCONS_00098043	Factor4	0.0186691	lncRNA_PBL
XLOC_067572	Factor4	0.018494	correlated_lncRNA
BovChr5Pos38483708	Factor4	0.0184003	Genomic
TCONS_00108351	Factor4	0.0183895	lncRNA_PBL
XLOC_073790	Factor4	0.0172868	correlated_lncRNA
ENSBTAT00000052574	Factor4	0.0166393	FT_PBL_mRNAcorrelation
ENSBTAT00000016296	Factor4	0.0166393	FT_PBL_mRNAcorrelation
TCONS_00039317	Factor4	0.0161378	lncRNA_PBL
BovChr18Pos32192982	Factor4	0.016104	Genomic
TCONS_00018625	Factor4	0.0155627	lncRNA_PBL
BovChr28Pos26892434	Factor4	0.0153205	Genomic
XLOC_086595	Factor4	0.0152243	correlated_lncRNA
BovChr5Pos88647267	Factor4	0.0149261	Genomic
ENSBTAT00000025313	Factor4	0.0147582	FT_PBL_mRNAcorrelation
BovChr3Pos92637901	Factor4	0.0146443	Genomic
BovChr5Pos41084896	Factor4	0.0143115	Genomic
TCONS_00094633	Factor4	0.0140491	lncRNA_PBL
TCONS_00043202	Factor4	0.0136677	lncRNA_PBL
BovChr17Pos49107623	Factor4	0.0130115	Genomic
BovChr1Pos147295445	Factor4	0.0130035	Genomic
BovChr3Pos87056414	Factor4	0.0128751	Genomic
BovChr4Pos87598662	Factor4	0.0112406	Genomic
BovChr5Pos71548472	Factor4	0.0112342	Genomic
ENSBTAT00000033464	Factor4	0.0109959	FT_PBL_mRNAcorrelation
ENSBTAT00000065252	Factor4	0.0109959	FT_PBL_mRNAcorrelation
ENSBTAT00000017348	Factor4	0.010599	FT_PBL_mRNAcorrelation
ENSBTAT00000077106	Factor4	0.010599	FT_PBL_mRNAcorrelation
XLOC_078036	Factor4	0.0104132	correlated_lncRNA
BovChr19Pos41594056	Factor4	0.00921232	Genomic
BovChr3Pos88991871	Factor4	0.00918973	Genomic
BovChr18Pos58716448	Factor4	0.0091484	Genomic
ENSBTAT00000044505	Factor4	0.00893416	FT_PBL_mRNAcorrelation
ENSBTAT00000002174	Factor4	0.00893416	FT_PBL_mRNAcorrelation
BovChr1Pos59924376	Factor4	0.00855803	Genomic
XLOC_064125	Factor4	0.00769956	correlated_lncRNA
BovChr17Pos46005257	Factor4	0.00736673	Genomic
ENSBTAT00000063250	Factor4	0.00705174	FT_PBL_mRNAcorrelation
BovChr8Pos36246265	Factor4	0.00632299	Genomic
BovChr18Pos61330975	Factor4	0.00627797	Genomic
BovChr10Pos81113154	Factor4	0.00620363	Genomic
XLOC_087236	Factor4	0.00608893	correlated_lncRNA
BovChr1Pos147338727	Factor4	0.00601187	Genomic
BovChr28Pos30633568	Factor4	0.005561	Genomic
ENSBTAT00000009152	Factor4	0.00543783	FT_PBL_mRNAcorrelation
BovChr28Pos27400738	Factor4	0.00509636	Genomic
XLOC_057036	Factor4	0.00491036	correlated_lncRNA
XLOC_018155	Factor4	0.0048357	correlated_lncRNA
BovChr3Pos34903364	Factor4	0.00424028	Genomic
BovChr15Pos5234380	Factor4	0.00384362	Genomic
BovChr8Pos35438545	Factor4	0.0037718	Genomic
BovChr3Pos89098449	Factor4	0.00371706	Genomic
BovChr25Pos1825647	Factor4	0.00315718	Genomic
BovChr18Pos57682137	Factor4	0.00314739	Genomic
BovChr28Pos27459868	Factor4	0.00254404	Genomic
BovChr18Pos57151314	Factor4	0.00226906	Genomic
BovChr17Pos46078006	Factor4	0.00224194	Genomic
BovChr3Pos88966274	Factor4	0.00171811	Genomic
ENSBTAT00000034283	Factor4	0.00158882	FT_PBL_mRNAcorrelation
ENSBTAT00000034282	Factor4	0.00158882	FT_PBL_mRNAcorrelation
BovChr15Pos9454207	Factor4	0.00152071	Genomic
BovChr3Pos92431268	Factor4	0.00133735	Genomic
TCONS_00092715	Factor4	0.00129027	lncRNA_PBL
BovChr1Pos147241898	Factor4	0.000338426	Genomic
TCONS_00089091	Factor4	0	lncRNA_PBL
TCONS_00075330	Factor4	0	lncRNA_PBL
TCONS_00100887	Factor4	0	lncRNA_PBL
TCONS_00038463	Factor4	0	lncRNA_PBL
TCONS_00143133	Factor4	0	lncRNA_PBL
ENSBTAT00000085877	Factor4	0	mRNA_PBL
BovChr3Pos89365301	Factor4	-0.000263516	Genomic
BovChr5Pos115916818	Factor4	-0.00113289	Genomic
ENSBTAT00000002019	Factor4	-0.00123429	FT_PBL_mRNAcorrelation
BovChr10Pos61837266	Factor4	-0.00125189	Genomic
BovChr3Pos92418182	Factor4	-0.00133735	Genomic
BovChr5Pos87192767	Factor4	-0.00146418	Genomic
ENSBTAT00000019939	Factor4	-0.00167385	FT_PBL_mRNAcorrelation
BovChr8Pos71492939	Factor4	-0.00168301	Genomic
BovChr3Pos88912286	Factor4	-0.00171811	Genomic
XLOC_068463	Factor4	-0.00178824	correlated_lncRNA
BovChr1Pos152960777	Factor4	-0.00200069	Genomic
TCONS_00027753	Factor4	-0.0021106	lncRNA_PBL
XLOC_039385	Factor4	-0.00213217	correlated_lncRNA
ENSBTAT00000063682	Factor4	-0.00235314	FT_PBL_mRNAcorrelation
XLOC_002754	Factor4	-0.00279584	correlated_lncRNA
BovChr3Pos30167683	Factor4	-0.00331914	Genomic
BovChr3Pos89181812	Factor4	-0.00395721	Genomic
ENSBTAT00000066269	Factor4	-0.0041011	FT_PBL_mRNAcorrelation
ENSBTAT00000080968	Factor4	-0.00420274	FT_PBL_mRNAcorrelation
ENSBTAT00000000975	Factor4	-0.00432855	FT_PBL_mRNAcorrelation
BovChr27Pos35710124	Factor4	-0.00556642	Genomic
ENSBTAT00000010081	Factor4	-0.00571306	FT_PBL_mRNAcorrelation
ENSBTAT00000079805	Factor4	-0.00616519	FT_PBL_mRNAcorrelation
ENSBTAT00000010956	Factor4	-0.00616519	FT_PBL_mRNAcorrelation
ENSBTAT00000074509	Factor4	-0.00616519	FT_PBL_mRNAcorrelation
BovChr10Pos81223782	Factor4	-0.00620363	Genomic
BovChr8Pos60881902	Factor4	-0.00646089	Genomic
BovChr21Pos23567453	Factor4	-0.00661233	Genomic
BovChr21Pos23723788	Factor4	-0.00661233	Genomic
BovChr16Pos26388857	Factor4	-0.00693587	Genomic
TCONS_00010780	Factor4	-0.00714485	lncRNA_PBL
BovChr15Pos7037828	Factor4	-0.007687	Genomic
BovChr3Pos93668143	Factor4	-0.00826393	Genomic
BovChr3Pos93849644	Factor4	-0.00826393	Genomic
BovChr3Pos93976377	Factor4	-0.00826393	Genomic
TCONS_00063332	Factor4	-0.00877273	lncRNA_PBL
BovChr27Pos38172660	Factor4	-0.00942982	Genomic
XLOC_027299	Factor4	-0.00979617	correlated_lncRNA
BovChr14Pos78522424	Factor4	-0.0103077	Genomic
ENSBTAT00000028731	Factor4	-0.0104871	FT_PBL_mRNAcorrelation
TCONS_00006012	Factor4	-0.0108109	lncRNA_PBL
BovChr10Pos61162083	Factor4	-0.011443	Genomic
BovChr10Pos65020001	Factor4	-0.011443	Genomic
ENSBTAT00000010543	Factor4	-0.0123508	FT_PBL_mRNAcorrelation
BovChr8Pos37458257	Factor4	-0.0125491	Genomic
BovChr27Pos23369775	Factor4	-0.012912	Genomic
BovChr14Pos78508738	Factor4	-0.0132393	Genomic
TCONS_00013035	Factor4	-0.013518	lncRNA_PBL
ENSBTAT00000072221	Factor4	-0.0142298	FT_PBL_mRNAcorrelation
ENSBTAT00000086173	Factor4	-0.0142298	FT_PBL_mRNAcorrelation
BovChr10Pos81229490	Factor4	-0.0143106	Genomic
BovChr23Pos44070630	Factor4	-0.014329	Genomic
ENSBTAT00000072352	Factor4	-0.01459	FT_PBL_mRNAcorrelation
BovChr8Pos36002556	Factor4	-0.0146383	Genomic
XLOC_071684	Factor4	-0.0148298	correlated_lncRNA
BovChr18Pos32277796	Factor4	-0.0149688	Genomic
BovChr14Pos78489957	Factor4	-0.014998	Genomic
TCONS_00020261	Factor4	-0.0150771	lncRNA_PBL
BovChr1Pos140713996	Factor4	-0.0154289	Genomic
ENSBTAT00000012873	Factor4	-0.0158584	FT_PBL_mRNAcorrelation
BovChr5Pos87473596	Factor4	-0.0167011	Genomic
BovChr28Pos42578721	Factor4	-0.0168109	Genomic
BovChr18Pos56124130	Factor4	-0.0168345	Genomic
TCONS_00037124	Factor4	-0.0173001	lncRNA_PBL
TCONS_00004427	Factor4	-0.0181081	lncRNA_PBL
BovChr1Pos45105866	Factor4	-0.0181675	Genomic
BovChr10Pos61137869	Factor4	-0.0183996	Genomic
BovChr1Pos49415050	Factor4	-0.0188237	Genomic
BovChr28Pos27160954	Factor4	-0.0189414	Genomic
TCONS_00159347	Factor4	-0.0197812	lncRNA_PBL
ENSBTAT00000022882	Factor4	-0.0197876	FT_PBL_mRNAcorrelation
BovChr5Pos87846351	Factor4	-0.0198365	Genomic
BovChr5Pos88182902	Factor4	-0.0200113	Genomic
ENSBTAT00000060010	Factor4	-0.0212735	FT_PBL_mRNAcorrelation
BovChr3Pos92302468	Factor4	-0.0213419	Genomic
TCONS_00018291	Factor4	-0.0214176	lncRNA_PBL
BovChr18Pos33388109	Factor4	-0.0216383	Genomic
TCONS_00141398	Factor4	-0.0219368	lncRNA_PBL
BovChr10Pos65055281	Factor4	-0.0229376	Genomic
TCONS_00041770	Factor4	-0.0236011	lncRNA_PBL
ENSBTAT00000087115	Factor4	-0.0239688	FT_PBL_mRNAcorrelation
BovChr5Pos87262266	Factor4	-0.0244654	Genomic
BovChr15Pos5127591	Factor4	-0.0246355	Genomic
TCONS_00093783	Factor4	-0.0247292	lncRNA_PBL
ENSBTAT00000006940	Factor4	-0.0250309	FT_PBL_mRNAcorrelation
BovChr17Pos46524672	Factor4	-0.0270261	Genomic
TCONS_00054681	Factor4	-0.0299636	lncRNA_PBL
BovChr5Pos116526173	Factor4	-0.0302352	Genomic
TCONS_00069298	Factor4	-0.0303286	lncRNA_PBL
TCONS_00069299	Factor4	-0.0303286	lncRNA_PBL
TCONS_00075574	Factor4	-0.0306756	lncRNA_PBL
ENSBTAT00000053129	Factor4	-0.0313675	FT_PBL_mRNAcorrelation
BovChr10Pos49448554	Factor4	-0.0313682	Genomic
ENSBTAT00000039742	Factor4	-0.0333527	FT_PBL_mRNAcorrelation
ENSBTAT00000079230	Factor4	-0.0333527	FT_PBL_mRNAcorrelation
ENSBTAT00000071874	Factor4	-0.0333527	FT_PBL_mRNAcorrelation
TCONS_00112307	Factor4	-0.0342148	lncRNA_PBL
BovChr28Pos24217547	Factor4	-0.0344547	Genomic
TCONS_00039806	Factor4	-0.0354011	lncRNA_PBL
BovChr11Pos46350640	Factor4	-0.0355733	Genomic
BovChr5Pos88079689	Factor4	-0.0368825	Genomic
TCONS_00017554	Factor4	-0.0404693	lncRNA_PBL
BovChr5Pos118053957	Factor4	-0.0420803	Genomic
ENSBTAT00000004933	Factor4	-0.0445485	FT_PBL_mRNAcorrelation
ENSBTAT00000086793	Factor4	-0.0445485	FT_PBL_mRNAcorrelation
ENSBTAT00000066560	Factor4	-0.0445485	FT_PBL_mRNAcorrelation
BovChr4Pos52315044	Factor4	-0.0473918	Genomic
ENSBTAT00000024393	Factor4	-0.0501291	FT_PBL_mRNAcorrelation
TCONS_00138346	Factor4	-0.0509375	lncRNA_PBL
BovChr10Pos62442084	Factor4	-0.0517004	Genomic
TCONS_00135441	Factor4	-0.0547531	lncRNA_PBL
ENSBTAT00000080012	Factor4	-0.0563519	FT_PBL_mRNAcorrelation
TCONS_00008818	Factor4	-0.0608467	lncRNA_PBL
ENSBTAT00000005857	Factor4	-0.0668361	FT_PBL_mRNAcorrelation
XLOC_045577	Factor4	-0.0675549	correlated_lncRNA
TCONS_00000796	Factor4	-0.0714632	lncRNA_PBL
TCONS_00111312	Factor4	-0.0733426	lncRNA_PBL
TCONS_00075162	Factor4	-0.0782268	lncRNA_PBL
TCONS_00125370	Factor4	-0.0791211	lncRNA_PBL
TCONS_00096752	Factor4	-0.0806538	lncRNA_PBL
TCONS_00119777	Factor4	-0.081419	lncRNA_PBL
ENSBTAT00000002554	Factor4	-0.0816272	FT_PBL_mRNAcorrelation
ENSBTAT00000056330	Factor4	-0.0818583	FT_PBL_mRNAcorrelation
ENSBTAT00000083235	Factor4	-0.0826758	FT_PBL_mRNAcorrelation
ENSBTAT00000081805	Factor4	-0.0826758	FT_PBL_mRNAcorrelation
ENSBTAT00000027302	Factor4	-0.0826758	FT_PBL_mRNAcorrelation
TCONS_00112217	Factor4	-0.0913089	lncRNA_PBL
XLOC_041441	Factor4	-0.0923905	correlated_lncRNA
XLOC_039281	Factor4	-0.0934249	correlated_lncRNA
TCONS_00061451	Factor4	-0.0984655	lncRNA_PBL
XLOC_011521	Factor4	-0.100936	correlated_lncRNA
TCONS_00088793	Factor4	-0.10177	lncRNA_PBL
TCONS_00083637	Factor4	-0.112564	lncRNA_PBL
TCONS_00075364	Factor4	-0.116524	lncRNA_FT
ENSBTAT00000004404	Factor4	-0.116931	FT_PBL_mRNAcorrelation
ENSBTAT00000004405	Factor4	-0.116931	FT_PBL_mRNAcorrelation
ENSBTAT00000084737	Factor4	-0.116931	FT_PBL_mRNAcorrelation
ENSBTAT00000083896	Factor4	-0.116931	FT_PBL_mRNAcorrelation
TCONS_00140956	Factor4	-0.118941	lncRNA_PBL
TCONS_00140957	Factor4	-0.118941	lncRNA_PBL
TCONS_00135216	Factor4	-0.120287	lncRNA_PBL
TCONS_00008850	Factor4	-0.120961	lncRNA_PBL
XLOC_038968	Factor4	-0.121965	correlated_lncRNA
TCONS_00125777	Factor4	-0.124198	lncRNA_PBL
XLOC_004951	Factor4	-0.131325	correlated_lncRNA
ENSBTAT00000075701	Factor4	-0.135612	FT_PBL_mRNAcorrelation
ENSBTAT00000054050	Factor4	-0.136818	FT_PBL_mRNAcorrelation
TCONS_00040004	Factor4	-0.138446	lncRNA_PBL
ENSBTAT00000046675	Factor4	-0.143441	FT_PBL_mRNAcorrelation
TCONS_00119403	Factor4	-0.143509	lncRNA_PBL
TCONS_00158679	Factor4	-0.144737	lncRNA_PBL
TCONS_00128532	Factor4	-0.150072	lncRNA_PBL
ENSBTAT00000077875	Factor4	-0.151572	FT_PBL_mRNAcorrelation
ENSBTAT00000073775	Factor4	-0.151572	FT_PBL_mRNAcorrelation
TCONS_00100308	Factor4	-0.151924	lncRNA_PBL
TCONS_00061578	Factor4	-0.154998	lncRNA_PBL
XLOC_084963	Factor4	-0.157022	correlated_lncRNA
TCONS_00105280	Factor4	-0.161728	lncRNA_PBL
TCONS_00003867	Factor4	-0.16603	lncRNA_PBL
TCONS_00123865	Factor4	-0.168812	lncRNA_PBL
TCONS_00012368	Factor4	-0.170141	lncRNA_PBL
TCONS_00043359	Factor4	-0.17078	lncRNA_PBL
TCONS_00110359	Factor4	-0.170935	lncRNA_PBL
XLOC_060497	Factor4	-0.171438	correlated_lncRNA
ENSBTAT00000067811	Factor4	-0.173594	FT_PBL_mRNAcorrelation
ENSBTAT00000020613	Factor4	-0.173594	FT_PBL_mRNAcorrelation
ENSBTAT00000002177	Factor4	-0.174211	FT_PBL_mRNAcorrelation
XLOC_002163	Factor4	-0.179827	correlated_lncRNA
TCONS_00076523	Factor4	-0.179948	lncRNA_PBL
ENSBTAT00000078698	Factor4	-0.182147	FT_PBL_mRNAcorrelation
ENSBTAT00000070950	Factor4	-0.182147	FT_PBL_mRNAcorrelation
ENSBTAT00000032447	Factor4	-0.182147	FT_PBL_mRNAcorrelation
TCONS_00036603	Factor4	-0.186835	lncRNA_PBL
TCONS_00061145	Factor4	-0.188214	lncRNA_PBL
TCONS_00001461	Factor4	-0.190223	lncRNA_PBL
ENSBTAT00000069805	Factor4	-0.195535	FT_PBL_mRNAcorrelation
ENSBTAT00000052893	Factor4	-0.195535	FT_PBL_mRNAcorrelation
TCONS_00141142	Factor4	-0.200206	lncRNA_PBL
ENSBTAT00000012008	Factor4	-0.201839	FT_PBL_mRNAcorrelation
TCONS_00018632	Factor4	-0.202011	lncRNA_PBL
TCONS_00092076	Factor4	-0.206309	lncRNA_PBL
TCONS_00086733	Factor4	-0.210872	FT_PBL_lncRNAcorrelation
TCONS_00016984	Factor4	-0.216521	lncRNA_PBL
TCONS_00145672	Factor4	-0.218035	lncRNA_PBL
TCONS_00046161	Factor4	-0.221515	lncRNA_PBL
TCONS_00004573	Factor4	-0.229724	lncRNA_PBL
TCONS_00044520	Factor4	-0.230428	lncRNA_PBL
TCONS_00039448	Factor4	-0.231015	lncRNA_PBL
TCONS_00002200	Factor4	-0.244607	lncRNA_PBL
TCONS_00101240	Factor4	-0.251162	lncRNA_PBL
ENSBTAT00000064376	Factor4	-0.257137	FT_PBL_mRNAcorrelation
TCONS_00053428	Factor4	-0.270626	lncRNA_PBL
TCONS_00124156	Factor4	-0.27468	lncRNA_PBL
ENSBTAT00000036603	Factor4	-0.275459	mRNA_FT
TCONS_00031449	Factor4	-0.28218	lncRNA_PBL
TCONS_00003707	Factor4	-0.288957	lncRNA_PBL
TCONS_00026261	Factor4	-0.302116	lncRNA_PBL
TCONS_00044242	Factor4	-0.304473	lncRNA_PBL
TCONS_00106205	Factor4	-0.30552	lncRNA_PBL
TCONS_00159414	Factor4	-0.307729	lncRNA_PBL
TCONS_00002627	Factor4	-0.30901	lncRNA_PBL
TCONS_00069198	Factor4	-0.312409	lncRNA_PBL
TCONS_00158660	Factor4	-0.318636	lncRNA_PBL
ENSBTAT00000084234	Factor4	-0.319736	mRNA_FT
TCONS_00002626	Factor4	-0.320336	lncRNA_PBL
ENSBTAT00000006518	Factor4	-0.323149	FT_PBL_mRNAcorrelation
TCONS_00096337	Factor4	-0.325438	lncRNA_PBL
TCONS_00088904	Factor4	-0.327146	lncRNA_PBL
XLOC_044640	Factor4	-0.328594	correlated_lncRNA
TCONS_00101280	Factor4	-0.330702	lncRNA_PBL
ENSBTAT00000006167	Factor4	-0.332156	mRNA_FT
ENSBTAT00000075123	Factor4	-0.332156	mRNA_FT
TCONS_00077054	Factor4	-0.334758	lncRNA_PBL
TCONS_00127876	Factor4	-0.339253	lncRNA_PBL
TCONS_00107203	Factor4	-0.343668	lncRNA_PBL
TCONS_00012085	Factor4	-0.352865	lncRNA_PBL
TCONS_00023610	Factor4	-0.356792	lncRNA_PBL
ENSBTAT00000080689	Factor4	-0.362759	FT_PBL_mRNAcorrelation
TCONS_00112543	Factor4	-0.364356	lncRNA_PBL
TCONS_00139365	Factor4	-0.375128	lncRNA_PBL
TCONS_00031219	Factor4	-0.386617	lncRNA_PBL
TCONS_00005565	Factor4	-0.407327	lncRNA_PBL
TCONS_00044187	Factor4	-0.407568	lncRNA_PBL
ENSBTAT00000079086	Factor4	-0.422345	mRNA_FT
ENSBTAT00000009559	Factor4	-0.422345	mRNA_FT
TCONS_00053076	Factor4	-0.424248	lncRNA_PBL
TCONS_00114247	Factor4	-0.425556	lncRNA_PBL
TCONS_00109742	Factor4	-0.426537	lncRNA_PBL
TCONS_00047741	Factor4	-0.427927	FT_PBL_lncRNAcorrelation
TCONS_00147757	Factor4	-0.435072	lncRNA_PBL
TCONS_00147758	Factor4	-0.435072	lncRNA_PBL
TCONS_00108174	Factor4	-0.453887	lncRNA_PBL
TCONS_00074028	Factor4	-0.459668	lncRNA_PBL
TCONS_00119757	Factor4	-0.461798	lncRNA_PBL
TCONS_00124297	Factor4	-0.46854	lncRNA_PBL
ENSBTAT00000086145	Factor4	-0.477585	mRNA_FT
ENSBTAT00000060036	Factor4	-0.481543	FT_PBL_mRNAcorrelation
TCONS_00056680	Factor4	-0.484458	lncRNA_PBL
TCONS_00050522	Factor4	-0.48487	lncRNA_PBL
TCONS_00032496	Factor4	-0.488238	lncRNA_PBL
ENSBTAT00000016390	Factor4	-0.494522	FT_PBL_mRNAcorrelation
TCONS_00140196	Factor4	-0.498639	lncRNA_PBL
TCONS_00000374	Factor4	-0.507477	lncRNA_PBL
TCONS_00131920	Factor4	-0.513514	lncRNA_PBL
TCONS_00121414	Factor4	-0.519302	lncRNA_PBL
TCONS_00030448	Factor4	-0.529467	lncRNA_PBL
TCONS_00120772	Factor4	-0.529852	lncRNA_PBL
TCONS_00136216	Factor4	-0.531549	lncRNA_PBL
TCONS_00028196	Factor4	-0.540367	lncRNA_PBL
TCONS_00145050	Factor4	-0.540911	lncRNA_PBL
TCONS_00131146	Factor4	-0.551919	lncRNA_PBL
TCONS_00097827	Factor4	-0.552881	lncRNA_PBL
TCONS_00136972	Factor4	-0.55707	lncRNA_PBL
TCONS_00159728	Factor4	-0.558541	lncRNA_PBL
TCONS_00037073	Factor4	-0.564161	lncRNA_PBL
TCONS_00159058	Factor4	-0.565512	lncRNA_PBL
TCONS_00076701	Factor4	-0.567472	lncRNA_PBL
TCONS_00044975	Factor4	-0.572146	lncRNA_PBL
ENSBTAT00000043202	Factor4	-0.572674	FT_PBL_mRNAcorrelation
TCONS_00043653	Factor4	-0.574057	lncRNA_PBL
TCONS_00012359	Factor4	-0.577391	lncRNA_PBL
TCONS_00044750	Factor4	-0.584396	lncRNA_PBL
TCONS_00053831	Factor4	-0.586275	lncRNA_PBL
ENSBTAT00000009800	Factor4	-0.586636	mRNA_FT
ENSBTAT00000078697	Factor4	-0.586636	mRNA_FT
TCONS_00075516	Factor4	-0.590614	lncRNA_PBL
TCONS_00107013	Factor4	-0.601202	lncRNA_PBL
ENSBTAT00000007931	Factor4	-0.606545	FT_PBL_mRNAcorrelation
TCONS_00042983	Factor4	-0.609313	lncRNA_PBL
TCONS_00098523	Factor4	-0.61636	lncRNA_PBL
TCONS_00000990	Factor4	-0.627226	lncRNA_PBL
ENSBTAT00000015929	Factor4	-0.639259	FT_PBL_mRNAcorrelation
ENSBTAT00000069897	Factor4	-0.639259	FT_PBL_mRNAcorrelation
ENSBTAT00000071024	Factor4	-0.639259	FT_PBL_mRNAcorrelation
TCONS_00008793	Factor4	-0.660478	lncRNA_PBL
TCONS_00025730	Factor4	-0.664079	lncRNA_PBL
TCONS_00121377	Factor4	-0.666554	lncRNA_PBL
TCONS_00085742	Factor4	-0.668465	lncRNA_PBL
TCONS_00146697	Factor4	-0.670121	lncRNA_PBL
ENSBTAT00000078457	Factor4	-0.672646	FT_PBL_mRNAcorrelation
ENSBTAT00000046968	Factor4	-0.672646	FT_PBL_mRNAcorrelation
ENSBTAT00000077777	Factor4	-0.672646	FT_PBL_mRNAcorrelation
ENSBTAT00000075960	Factor4	-0.672646	FT_PBL_mRNAcorrelation
TCONS_00148379	Factor4	-0.673987	lncRNA_PBL
TCONS_00071213	Factor4	-0.680433	lncRNA_PBL
TCONS_00022155	Factor4	-0.686822	lncRNA_PBL
TCONS_00003218	Factor4	-0.696866	lncRNA_PBL
TCONS_00121663	Factor4	-0.698237	lncRNA_PBL
TCONS_00098283	Factor4	-0.717758	lncRNA_PBL
TCONS_00111372	Factor4	-0.725794	lncRNA_PBL
TCONS_00036060	Factor4	-0.727898	lncRNA_PBL
ENSBTAT00000007553	Factor4	-0.732339	FT_PBL_mRNAcorrelation
TCONS_00000332	Factor4	-0.734809	lncRNA_PBL
TCONS_00059144	Factor4	-0.737656	FT_PBL_lncRNAcorrelation
TCONS_00086644	Factor4	-0.739578	lncRNA_PBL
TCONS_00041346	Factor4	-0.740232	lncRNA_PBL
ENSBTAT00000005688	Factor4	-0.741319	FT_PBL_mRNAcorrelation
TCONS_00121000	Factor4	-0.745334	lncRNA_PBL
TCONS_00099721	Factor4	-0.756009	lncRNA_PBL
TCONS_00032166	Factor4	-0.7586	lncRNA_PBL
TCONS_00000550	Factor4	-0.781215	lncRNA_PBL
TCONS_00130435	Factor4	-0.781828	lncRNA_PBL
TCONS_00142246	Factor4	-0.794504	lncRNA_PBL
TCONS_00030572	Factor4	-0.795306	lncRNA_PBL
TCONS_00084573	Factor4	-0.796177	lncRNA_PBL
TCONS_00139660	Factor4	-0.798759	lncRNA_PBL
TCONS_00138819	Factor4	-0.807661	lncRNA_PBL
TCONS_00087133	Factor4	-0.813837	lncRNA_PBL
TCONS_00034742	Factor4	-0.822092	lncRNA_PBL
TCONS_00041424	Factor4	-0.82254	lncRNA_PBL
TCONS_00134866	Factor4	-0.828049	lncRNA_PBL
TCONS_00127612	Factor4	-0.831775	lncRNA_PBL
TCONS_00008148	Factor4	-0.848003	lncRNA_PBL
TCONS_00144599	Factor4	-0.859076	lncRNA_PBL
TCONS_00047565	Factor4	-0.867879	lncRNA_PBL
TCONS_00107822	Factor4	-0.868167	lncRNA_PBL
TCONS_00041300	Factor4	-0.875299	lncRNA_PBL
TCONS_00139384	Factor4	-0.877583	lncRNA_PBL
TCONS_00073050	Factor4	-0.885956	lncRNA_PBL
TCONS_00068191	Factor4	-0.905999	lncRNA_PBL
TCONS_00146685	Factor4	-0.908268	lncRNA_PBL
TCONS_00025836	Factor4	-0.917264	lncRNA_PBL
TCONS_00118350	Factor4	-0.919298	lncRNA_PBL
TCONS_00096146	Factor4	-0.921352	lncRNA_PBL
TCONS_00050140	Factor4	-0.927888	lncRNA_PBL
TCONS_00109264	Factor4	-0.94527	lncRNA_PBL
TCONS_00044748	Factor4	-0.945809	lncRNA_PBL
TCONS_00058749	Factor4	-0.946013	lncRNA_PBL
TCONS_00146209	Factor4	-0.951367	lncRNA_PBL
TCONS_00146208	Factor4	-0.951367	lncRNA_PBL
TCONS_00146207	Factor4	-0.951367	lncRNA_PBL
TCONS_00146210	Factor4	-0.951367	lncRNA_PBL
TCONS_00146206	Factor4	-0.951367	lncRNA_PBL
TCONS_00051595	Factor4	-0.954935	lncRNA_PBL
TCONS_00133100	Factor4	-0.956411	lncRNA_PBL
TCONS_00014848	Factor4	-0.962583	lncRNA_PBL
TCONS_00071848	Factor4	-0.986054	lncRNA_PBL
TCONS_00001878	Factor4	-0.986956	lncRNA_PBL
TCONS_00154680	Factor4	-0.98751	lncRNA_PBL
ENSBTAT00000063809	Factor4	-0.988813	FT_PBL_mRNAcorrelation
TCONS_00016158	Factor4	-0.994912	lncRNA_PBL
TCONS_00085801	Factor4	-0.995629	lncRNA_PBL
TCONS_00134969	Factor4	-0.997876	lncRNA_PBL
TCONS_00139085	Factor4	-0.99816	lncRNA_PBL
TCONS_00130412	Factor4	-1.00661	lncRNA_PBL
TCONS_00133765	Factor4	-1.01588	lncRNA_PBL
TCONS_00100860	Factor4	-1.02063	lncRNA_PBL
TCONS_00160602	Factor4	-1.02226	lncRNA_PBL
TCONS_00078103	Factor4	-1.0255	lncRNA_PBL
TCONS_00158968	Factor4	-1.02706	lncRNA_PBL
ENSBTAT00000004378	Factor4	-1.04172	FT_PBL_mRNAcorrelation
TCONS_00011825	Factor4	-1.0493	lncRNA_PBL
TCONS_00113085	Factor4	-1.05405	lncRNA_PBL
TCONS_00040162	Factor4	-1.06725	lncRNA_PBL
TCONS_00072008	Factor4	-1.06765	lncRNA_PBL
TCONS_00149502	Factor4	-1.06855	lncRNA_PBL
TCONS_00023641	Factor4	-1.07707	lncRNA_PBL
TCONS_00006450	Factor4	-1.09745	lncRNA_PBL
TCONS_00053337	Factor4	-1.10775	lncRNA_PBL
TCONS_00078470	Factor4	-1.11477	lncRNA_PBL
TCONS_00125794	Factor4	-1.12586	lncRNA_PBL
TCONS_00078970	Factor4	-1.12594	lncRNA_PBL
TCONS_00118596	Factor4	-1.13069	lncRNA_PBL
TCONS_00149952	Factor4	-1.13235	lncRNA_PBL
TCONS_00126329	Factor4	-1.14912	lncRNA_PBL
TCONS_00052688	Factor4	-1.15051	lncRNA_PBL
TCONS_00098862	Factor4	-1.15064	lncRNA_PBL
TCONS_00023697	Factor4	-1.17156	lncRNA_PBL
TCONS_00136918	Factor4	-1.17957	lncRNA_PBL
TCONS_00131530	Factor4	-1.18086	lncRNA_PBL
TCONS_00086072	Factor4	-1.18185	lncRNA_PBL
TCONS_00119654	Factor4	-1.19038	lncRNA_PBL
TCONS_00093443	Factor4	-1.19268	lncRNA_PBL
TCONS_00058727	Factor4	-1.19779	lncRNA_PBL
TCONS_00105366	Factor4	-1.19855	lncRNA_PBL
TCONS_00144634	Factor4	-1.20493	lncRNA_PBL
TCONS_00092314	Factor4	-1.21107	lncRNA_PBL
TCONS_00027564	Factor4	-1.21353	lncRNA_PBL
TCONS_00014033	Factor4	-1.22155	lncRNA_PBL
TCONS_00150125	Factor4	-1.228	lncRNA_PBL
TCONS_00072273	Factor4	-1.22852	lncRNA_PBL
TCONS_00051550	Factor4	-1.23216	lncRNA_PBL
TCONS_00025168	Factor4	-1.23302	lncRNA_PBL
TCONS_00085851	Factor4	-1.25214	lncRNA_PBL
TCONS_00102571	Factor4	-1.25834	lncRNA_PBL
TCONS_00131149	Factor4	-1.26197	lncRNA_PBL
TCONS_00099717	Factor4	-1.26851	lncRNA_PBL
TCONS_00006110	Factor4	-1.26901	lncRNA_PBL
TCONS_00000539	Factor4	-1.27539	lncRNA_PBL
TCONS_00000316	Factor4	-1.28156	lncRNA_PBL
TCONS_00041053	Factor4	-1.28204	lncRNA_PBL
TCONS_00015183	Factor4	-1.29771	lncRNA_PBL
TCONS_00072040	Factor4	-1.3042	lncRNA_PBL
TCONS_00160378	Factor4	-1.30866	lncRNA_PBL
TCONS_00045658	Factor4	-1.30871	lncRNA_PBL
TCONS_00050280	Factor4	-1.31843	lncRNA_PBL
TCONS_00118014	Factor4	-1.31931	lncRNA_PBL
TCONS_00044710	Factor4	-1.32099	lncRNA_PBL
TCONS_00095276	Factor4	-1.3215	lncRNA_PBL
TCONS_00039695	Factor4	-1.32483	lncRNA_PBL
TCONS_00129514	Factor4	-1.33557	lncRNA_PBL
TCONS_00023539	Factor4	-1.34853	lncRNA_PBL
TCONS_00068514	Factor4	-1.37276	lncRNA_PBL
TCONS_00145665	Factor4	-1.3763	lncRNA_PBL
TCONS_00157333	Factor4	-1.38102	lncRNA_PBL
TCONS_00079517	Factor4	-1.38436	lncRNA_PBL
TCONS_00023130	Factor4	-1.40257	lncRNA_PBL
TCONS_00159760	Factor4	-1.40736	lncRNA_PBL
TCONS_00120767	Factor4	-1.42112	lncRNA_PBL
TCONS_00035042	Factor4	-1.42607	lncRNA_PBL
TCONS_00115456	Factor4	-1.43769	lncRNA_PBL
TCONS_00114333	Factor4	-1.43963	lncRNA_PBL
TCONS_00028865	Factor4	-1.44532	lncRNA_PBL
TCONS_00057720	Factor4	-1.44701	lncRNA_PBL
TCONS_00098439	Factor4	-1.45317	lncRNA_PBL
TCONS_00007508	Factor4	-1.45702	lncRNA_PBL
TCONS_00077454	Factor4	-1.47085	lncRNA_PBL
TCONS_00148377	Factor4	-1.47265	lncRNA_PBL
TCONS_00132084	Factor4	-1.47507	lncRNA_PBL
TCONS_00001916	Factor4	-1.48116	lncRNA_PBL
TCONS_00022781	Factor4	-1.48347	lncRNA_PBL
TCONS_00044724	Factor4	-1.51144	lncRNA_PBL
TCONS_00088948	Factor4	-1.51773	lncRNA_PBL
TCONS_00120946	Factor4	-1.51925	lncRNA_PBL
TCONS_00021783	Factor4	-1.51982	lncRNA_PBL
TCONS_00111997	Factor4	-1.522	lncRNA_PBL
TCONS_00131019	Factor4	-1.53058	lncRNA_PBL
TCONS_00078079	Factor4	-1.54779	lncRNA_PBL
TCONS_00005544	Factor4	-1.58842	lncRNA_PBL
ENSBTAT00000076334	Factor4	-1.59036	mRNA_FT
TCONS_00160971	Factor4	-1.59446	lncRNA_PBL
TCONS_00025259	Factor4	-1.59531	lncRNA_PBL
TCONS_00014056	Factor4	-1.63664	lncRNA_PBL
TCONS_00130817	Factor4	-1.64636	lncRNA_PBL
TCONS_00014464	Factor4	-1.65385	lncRNA_PBL
TCONS_00070881	Factor4	-1.6654	lncRNA_PBL
TCONS_00147568	Factor4	-1.6657	lncRNA_PBL
TCONS_00082417	Factor4	-1.66934	lncRNA_PBL
TCONS_00158914	Factor4	-1.67632	lncRNA_PBL
TCONS_00071505	Factor4	-1.67869	lncRNA_PBL
TCONS_00037459	Factor4	-1.68481	lncRNA_PBL
TCONS_00069153	Factor4	-1.68599	lncRNA_PBL
TCONS_00124396	Factor4	-1.69472	lncRNA_PBL
TCONS_00058888	Factor4	-1.69508	lncRNA_PBL
TCONS_00039443	Factor4	-1.69743	lncRNA_PBL
TCONS_00121007	Factor4	-1.69966	lncRNA_PBL
TCONS_00147021	Factor4	-1.70064	lncRNA_PBL
TCONS_00023517	Factor4	-1.70732	lncRNA_PBL
TCONS_00065226	Factor4	-1.72662	lncRNA_PBL
TCONS_00110636	Factor4	-1.73411	lncRNA_PBL
TCONS_00069990	Factor4	-1.7358	lncRNA_PBL
TCONS_00114682	Factor4	-1.75312	lncRNA_PBL
TCONS_00139631	Factor4	-1.75397	lncRNA_PBL
TCONS_00090913	Factor4	-1.75402	lncRNA_PBL
TCONS_00009738	Factor4	-1.78237	lncRNA_PBL
TCONS_00040454	Factor4	-1.78522	FT_PBL_lncRNAcorrelation
TCONS_00111322	Factor4	-1.8005	lncRNA_PBL
TCONS_00041929	Factor4	-1.80598	lncRNA_PBL
TCONS_00005022	Factor4	-1.81202	lncRNA_PBL
TCONS_00005428	Factor4	-1.82486	lncRNA_PBL
TCONS_00003708	Factor4	-1.83247	lncRNA_PBL
TCONS_00080149	Factor4	-1.83631	lncRNA_PBL
TCONS_00111824	Factor4	-1.84096	lncRNA_PBL
TCONS_00149669	Factor4	-1.84939	lncRNA_PBL
TCONS_00132026	Factor4	-1.85496	lncRNA_PBL
TCONS_00077484	Factor4	-1.88859	lncRNA_PBL
TCONS_00018621	Factor4	-1.8992	lncRNA_PBL
TCONS_00087318	Factor4	-1.9008	lncRNA_PBL
TCONS_00032872	Factor4	-1.90439	FT_PBL_lncRNAcorrelation
TCONS_00146868	Factor4	-1.90504	lncRNA_PBL
TCONS_00109315	Factor4	-1.90947	lncRNA_PBL
TCONS_00015791	Factor4	-1.91285	lncRNA_PBL
TCONS_00022661	Factor4	-1.91701	lncRNA_PBL
TCONS_00128548	Factor4	-1.92109	lncRNA_PBL
TCONS_00028207	Factor4	-1.93205	lncRNA_PBL
TCONS_00064302	Factor4	-1.9321	lncRNA_PBL
TCONS_00091421	Factor4	-1.93567	FT_PBL_lncRNAcorrelation
TCONS_00047221	Factor4	-1.94216	lncRNA_PBL
TCONS_00146997	Factor4	-1.95877	lncRNA_PBL
TCONS_00044081	Factor4	-1.96677	lncRNA_PBL
TCONS_00136419	Factor4	-1.98874	lncRNA_PBL
TCONS_00025478	Factor4	-2.00098	lncRNA_PBL
TCONS_00037360	Factor4	-2.01194	lncRNA_PBL
TCONS_00012685	Factor4	-2.01279	lncRNA_PBL
TCONS_00033669	Factor4	-2.02554	lncRNA_PBL
TCONS_00158108	Factor4	-2.03958	lncRNA_PBL
TCONS_00114690	Factor4	-2.04812	lncRNA_PBL
TCONS_00031226	Factor4	-2.05532	lncRNA_PBL
TCONS_00096472	Factor4	-2.05555	lncRNA_PBL
TCONS_00118706	Factor4	-2.07076	lncRNA_PBL
TCONS_00007128	Factor4	-2.08104	lncRNA_PBL
TCONS_00043927	Factor4	-2.08633	lncRNA_PBL
TCONS_00025821	Factor4	-2.08716	lncRNA_PBL
TCONS_00071074	Factor4	-2.09598	lncRNA_PBL
TCONS_00045081	Factor4	-2.09821	lncRNA_PBL
TCONS_00078477	Factor4	-2.09862	lncRNA_PBL
TCONS_00043403	Factor4	-2.10688	lncRNA_PBL
TCONS_00071609	Factor4	-2.1205	lncRNA_PBL
TCONS_00057385	Factor4	-2.12282	lncRNA_PBL
TCONS_00137976	Factor4	-2.12558	lncRNA_PBL
TCONS_00043056	Factor4	-2.13127	lncRNA_PBL
TCONS_00029252	Factor4	-2.13136	lncRNA_PBL
TCONS_00099562	Factor4	-2.13451	lncRNA_PBL
TCONS_00114484	Factor4	-2.13518	lncRNA_PBL
TCONS_00124373	Factor4	-2.13544	lncRNA_PBL
TCONS_00049611	Factor4	-2.13665	lncRNA_PBL
TCONS_00011774	Factor4	-2.15003	lncRNA_PBL
TCONS_00123915	Factor4	-2.16005	lncRNA_PBL
ENSBTAT00000083717	Factor4	-2.17504	FT_PBL_mRNAcorrelation
TCONS_00138547	Factor4	-2.18243	lncRNA_PBL
TCONS_00071670	Factor4	-2.18375	lncRNA_PBL
TCONS_00032205	Factor4	-2.19161	lncRNA_PBL
TCONS_00003281	Factor4	-2.19604	lncRNA_PBL
TCONS_00022484	Factor4	-2.1999	lncRNA_PBL
TCONS_00007986	Factor4	-2.20671	lncRNA_PBL
TCONS_00112226	Factor4	-2.2165	lncRNA_PBL
TCONS_00120070	Factor4	-2.22536	lncRNA_PBL
TCONS_00109776	Factor4	-2.22589	lncRNA_PBL
TCONS_00050205	Factor4	-2.2331	lncRNA_PBL
TCONS_00097744	Factor4	-2.23628	lncRNA_PBL
TCONS_00005359	Factor4	-2.23797	lncRNA_PBL
TCONS_00067988	Factor4	-2.25358	lncRNA_PBL
TCONS_00124163	Factor4	-2.25457	lncRNA_PBL
TCONS_00123091	Factor4	-2.25507	lncRNA_PBL
TCONS_00034005	Factor4	-2.27199	lncRNA_PBL
TCONS_00011932	Factor4	-2.27323	lncRNA_PBL
TCONS_00027243	Factor4	-2.277	lncRNA_PBL
TCONS_00073168	Factor4	-2.27755	lncRNA_PBL
TCONS_00105984	Factor4	-2.28665	lncRNA_PBL
TCONS_00083625	Factor4	-2.29453	lncRNA_PBL
TCONS_00040754	Factor4	-2.29523	lncRNA_PBL
TCONS_00104487	Factor4	-2.31039	lncRNA_PBL
TCONS_00126592	Factor4	-2.31616	lncRNA_PBL
TCONS_00043652	Factor4	-2.33318	lncRNA_PBL
TCONS_00135417	Factor4	-2.35053	lncRNA_PBL
TCONS_00044700	Factor4	-2.35873	lncRNA_PBL
TCONS_00024158	Factor4	-2.36406	lncRNA_PBL
TCONS_00059778	Factor4	-2.36603	lncRNA_PBL
ENSBTAT00000072692	Factor4	-2.36933	mRNA_FT
ENSBTAT00000018054	Factor4	-2.36933	mRNA_FT
TCONS_00009547	Factor4	-2.37402	lncRNA_PBL
TCONS_00039954	Factor4	-2.38973	lncRNA_PBL
TCONS_00093114	Factor4	-2.39796	lncRNA_PBL
TCONS_00147003	Factor4	-2.39919	lncRNA_PBL
TCONS_00128659	Factor4	-2.41663	lncRNA_PBL
TCONS_00136245	Factor4	-2.4195	lncRNA_PBL
TCONS_00162230	Factor4	-2.43024	lncRNA_PBL
TCONS_00100963	Factor4	-2.43183	lncRNA_PBL
TCONS_00085603	Factor4	-2.43606	lncRNA_PBL
TCONS_00117799	Factor4	-2.43674	lncRNA_PBL
TCONS_00035173	Factor4	-2.44041	FT_PBL_lncRNAcorrelation
TCONS_00019398	Factor4	-2.4486	lncRNA_PBL
TCONS_00110966	Factor4	-2.45448	lncRNA_PBL
TCONS_00089197	Factor4	-2.4592	lncRNA_PBL
TCONS_00093172	Factor4	-2.46041	lncRNA_PBL
TCONS_00009730	Factor4	-2.46223	lncRNA_PBL
TCONS_00078999	Factor4	-2.46803	lncRNA_PBL
TCONS_00080822	Factor4	-2.46963	lncRNA_PBL
TCONS_00159143	Factor4	-2.47594	lncRNA_PBL
TCONS_00014346	Factor4	-2.47725	lncRNA_PBL
TCONS_00069315	Factor4	-2.47772	lncRNA_PBL
TCONS_00013452	Factor4	-2.49429	lncRNA_PBL
TCONS_00108707	Factor4	-2.49468	lncRNA_PBL
TCONS_00006075	Factor4	-2.50101	lncRNA_PBL
TCONS_00148062	Factor4	-2.5119	lncRNA_PBL
TCONS_00073918	Factor4	-2.51235	lncRNA_PBL
TCONS_00148844	Factor4	-2.51631	lncRNA_PBL
TCONS_00052337	Factor4	-2.5167	lncRNA_PBL
TCONS_00067013	Factor4	-2.51797	lncRNA_PBL
TCONS_00041503	Factor4	-2.51853	lncRNA_PBL
TCONS_00110298	Factor4	-2.54013	lncRNA_PBL
TCONS_00047197	Factor4	-2.54972	lncRNA_PBL
TCONS_00025033	Factor4	-2.57312	lncRNA_PBL
TCONS_00148959	Factor4	-2.57926	lncRNA_PBL
TCONS_00059146	Factor4	-2.58366	lncRNA_PBL
TCONS_00003603	Factor4	-2.58471	lncRNA_PBL
TCONS_00118611	Factor4	-2.58707	lncRNA_PBL
TCONS_00082299	Factor4	-2.58711	lncRNA_PBL
TCONS_00104303	Factor4	-2.60803	lncRNA_PBL
TCONS_00058432	Factor4	-2.60877	lncRNA_PBL
TCONS_00099631	Factor4	-2.61621	lncRNA_PBL
TCONS_00002956	Factor4	-2.62127	lncRNA_PBL
TCONS_00048652	Factor4	-2.63804	lncRNA_PBL
TCONS_00121664	Factor4	-2.64582	lncRNA_PBL
TCONS_00068414	Factor4	-2.64809	lncRNA_PBL
TCONS_00010610	Factor4	-2.65076	lncRNA_PBL
TCONS_00002327	Factor4	-2.65709	lncRNA_PBL
TCONS_00156653	Factor4	-2.66585	lncRNA_PBL
TCONS_00039450	Factor4	-2.66674	lncRNA_PBL
TCONS_00003323	Factor4	-2.67653	lncRNA_PBL
TCONS_00097366	Factor4	-2.67946	lncRNA_PBL
TCONS_00040388	Factor4	-2.68912	lncRNA_PBL
TCONS_00031952	Factor4	-2.69323	lncRNA_PBL
TCONS_00080819	Factor4	-2.69919	lncRNA_PBL
TCONS_00115576	Factor4	-2.70333	lncRNA_PBL
TCONS_00043604	Factor4	-2.72215	lncRNA_PBL
TCONS_00114337	Factor4	-2.73954	lncRNA_PBL
TCONS_00121096	Factor4	-2.77539	lncRNA_PBL
ENSBTAT00000065982	Factor4	-2.78517	FT_PBL_mRNAcorrelation
TCONS_00146814	Factor4	-2.78805	lncRNA_PBL
TCONS_00093296	Factor4	-2.78837	lncRNA_PBL
TCONS_00011728	Factor4	-2.79145	lncRNA_PBL
TCONS_00053925	Factor4	-2.79283	lncRNA_PBL
TCONS_00030723	Factor4	-2.80759	lncRNA_PBL
TCONS_00125883	Factor4	-2.81408	lncRNA_PBL
TCONS_00127345	Factor4	-2.82118	lncRNA_PBL
TCONS_00093045	Factor4	-2.82214	lncRNA_PBL
TCONS_00032719	Factor4	-2.82814	lncRNA_PBL
TCONS_00003871	Factor4	-2.82918	lncRNA_PBL
TCONS_00144472	Factor4	-2.83192	lncRNA_PBL
TCONS_00067543	Factor4	-2.84379	lncRNA_PBL
TCONS_00059797	Factor4	-2.87054	lncRNA_PBL
TCONS_00131213	Factor4	-2.8923	lncRNA_PBL
TCONS_00144544	Factor4	-2.92544	lncRNA_PBL
TCONS_00007964	Factor4	-2.93091	lncRNA_PBL
TCONS_00126680	Factor4	-2.94206	lncRNA_PBL
TCONS_00025086	Factor4	-2.96191	lncRNA_PBL
TCONS_00004001	Factor4	-2.96853	lncRNA_PBL
TCONS_00109483	Factor4	-2.97639	lncRNA_PBL
TCONS_00141462	Factor4	-2.97807	lncRNA_PBL
TCONS_00162564	Factor4	-2.98502	lncRNA_PBL
TCONS_00002454	Factor4	-2.9916	lncRNA_PBL
TCONS_00060930	Factor4	-2.99357	lncRNA_PBL
TCONS_00028425	Factor4	-2.99394	lncRNA_PBL
ENSBTAT00000031134	Factor4	-3.00086	mRNA_FT
ENSBTAT00000084648	Factor4	-3.00086	mRNA_FT
ENSBTAT00000054358	Factor4	-3.00086	mRNA_FT
ENSBTAT00000056121	Factor4	-3.00086	mRNA_FT
TCONS_00098510	Factor4	-3.00266	lncRNA_PBL
TCONS_00019768	Factor4	-3.00584	lncRNA_PBL
TCONS_00012365	Factor4	-3.02984	lncRNA_PBL
TCONS_00098807	Factor4	-3.03726	lncRNA_PBL
TCONS_00131998	Factor4	-3.04886	lncRNA_PBL
TCONS_00012654	Factor4	-3.04956	lncRNA_PBL
TCONS_00158516	Factor4	-3.06219	lncRNA_PBL
TCONS_00142960	Factor4	-3.07061	lncRNA_PBL
TCONS_00066154	Factor4	-3.07448	lncRNA_PBL
TCONS_00081630	Factor4	-3.07604	lncRNA_PBL
TCONS_00125076	Factor4	-3.07816	lncRNA_PBL
TCONS_00037904	Factor4	-3.09816	lncRNA_PBL
TCONS_00108100	Factor4	-3.09889	lncRNA_PBL
TCONS_00161090	Factor4	-3.10534	lncRNA_PBL
TCONS_00026236	Factor4	-3.11406	lncRNA_PBL
TCONS_00109577	Factor4	-3.11418	lncRNA_PBL
TCONS_00094359	Factor4	-3.1279	lncRNA_PBL
TCONS_00111816	Factor4	-3.13084	lncRNA_PBL
TCONS_00028478	Factor4	-3.13125	lncRNA_PBL
TCONS_00143720	Factor4	-3.13882	lncRNA_PBL
TCONS_00074626	Factor4	-3.14528	lncRNA_PBL
TCONS_00047926	Factor4	-3.16237	lncRNA_PBL
TCONS_00071923	Factor4	-3.18469	lncRNA_PBL
TCONS_00101308	Factor4	-3.19161	lncRNA_PBL
TCONS_00107589	Factor4	-3.21163	lncRNA_PBL
TCONS_00091420	Factor4	-3.21791	FT_PBL_lncRNAcorrelation
TCONS_00079260	Factor4	-3.23079	lncRNA_PBL
TCONS_00004861	Factor4	-3.25456	lncRNA_PBL
TCONS_00007361	Factor4	-3.27999	lncRNA_PBL
TCONS_00143392	Factor4	-3.29117	lncRNA_PBL
TCONS_00044918	Factor4	-3.2937	lncRNA_PBL
TCONS_00071908	Factor4	-3.29776	lncRNA_PBL
TCONS_00078266	Factor4	-3.32068	lncRNA_PBL
TCONS_00100302	Factor4	-3.35749	lncRNA_PBL
TCONS_00063877	Factor4	-3.37682	lncRNA_PBL
TCONS_00130425	Factor4	-3.40614	lncRNA_PBL
TCONS_00063714	Factor4	-3.44657	lncRNA_PBL
TCONS_00033271	Factor4	-3.44755	lncRNA_PBL
TCONS_00011293	Factor4	-3.45547	lncRNA_PBL
TCONS_00125227	Factor4	-3.46096	lncRNA_PBL
TCONS_00067525	Factor4	-3.46461	lncRNA_PBL
TCONS_00033018	Factor4	-3.51233	lncRNA_PBL
TCONS_00002357	Factor4	-3.53745	lncRNA_PBL
TCONS_00117613	Factor4	-3.54215	lncRNA_PBL
TCONS_00004481	Factor4	-3.5547	lncRNA_PBL
TCONS_00068231	Factor4	-3.57005	lncRNA_PBL
TCONS_00128101	Factor4	-3.58446	lncRNA_PBL
TCONS_00002331	Factor4	-3.5876	lncRNA_PBL
TCONS_00073244	Factor4	-3.61059	lncRNA_PBL
TCONS_00069695	Factor4	-3.6218	lncRNA_PBL
TCONS_00116487	Factor4	-3.71459	lncRNA_PBL
TCONS_00024798	Factor4	-3.73322	lncRNA_PBL
ENSBTAT00000009415	Factor4	-3.73956	mRNA_FT
ENSBTAT00000040146	Factor4	-3.73956	mRNA_FT
TCONS_00088566	Factor4	-3.75729	lncRNA_PBL
TCONS_00109631	Factor4	-3.76617	lncRNA_PBL
TCONS_00028767	Factor4	-3.76846	lncRNA_PBL
TCONS_00069134	Factor4	-3.83544	lncRNA_PBL
TCONS_00148176	Factor4	-3.83673	lncRNA_PBL
ENSBTAT00000013399	Factor4	-3.84882	mRNA_FT
TCONS_00041068	Factor4	-3.86699	lncRNA_PBL
TCONS_00006857	Factor4	-3.89988	lncRNA_PBL
TCONS_00018424	Factor4	-3.9356	lncRNA_PBL
TCONS_00161983	Factor4	-3.94584	lncRNA_PBL
TCONS_00126920	Factor4	-3.96844	lncRNA_PBL
TCONS_00044688	Factor4	-4.0805	lncRNA_PBL
TCONS_00137018	Factor4	-4.08815	lncRNA_PBL
TCONS_00034727	Factor4	-4.09963	lncRNA_PBL
TCONS_00061739	Factor4	-4.11969	lncRNA_PBL
ENSBTAT00000047589	Factor4	-4.14604	mRNA_FT
ENSBTAT00000081763	Factor4	-4.14604	mRNA_FT
ENSBTAT00000075931	Factor4	-4.14604	mRNA_FT
ENSBTAT00000006929	Factor4	-4.14604	mRNA_FT
TCONS_00130993	Factor4	-4.39262	lncRNA_PBL
TCONS_00104316	Factor4	-4.42353	lncRNA_PBL
TCONS_00007482	Factor4	-4.42512	lncRNA_PBL
TCONS_00025031	Factor4	-4.46019	lncRNA_PBL
TCONS_00084866	Factor4	-4.62478	lncRNA_PBL
TCONS_00062541	Factor4	-4.67326	lncRNA_PBL
TCONS_00159371	Factor4	-4.69661	lncRNA_PBL
TCONS_00100704	Factor4	-4.77377	lncRNA_PBL
ENSBTAT00000040084	Factor4	-4.98054	mRNA_FT
ENSBTAT00000067039	Factor4	-4.98054	mRNA_FT
ENSBTAT00000026215	Factor4	-5.20455	mRNA_FT
ENSBTAT00000084624	Factor4	-5.20455	mRNA_FT
TCONS_00079253	Factor4	-5.31058	lncRNA_PBL
TCONS_00043426	Factor4	-5.31325	lncRNA_PBL
TCONS_00088237	Factor4	-5.40926	lncRNA_PBL
TCONS_00149538	Factor4	-5.4545	lncRNA_PBL
TCONS_00002376	Factor4	-5.57515	lncRNA_PBL
TCONS_00098519	Factor4	-5.6616	lncRNA_PBL
TCONS_00115477	Factor4	-5.67137	lncRNA_PBL
TCONS_00115061	Factor4	-6.49967	lncRNA_PBL
ENSBTAT00000067324	Factor4	-6.70778	mRNA_FT
ENSBTAT00000079639	Factor4	-6.70778	mRNA_FT
ENSBTAT00000072340	Factor4	-6.70778	mRNA_FT
ENSBTAT00000083420	Factor4	-6.70778	mRNA_FT
ENSBTAT00000055332	Factor4	-6.70778	mRNA_FT
ENSBTAT00000085326	Factor4	-6.70778	mRNA_FT
ENSBTAT00000076269	Factor4	-6.70778	mRNA_FT
ENSBTAT00000080343	Factor4	-6.70778	mRNA_FT
ENSBTAT00000082005	Factor4	-6.70778	mRNA_FT
ENSBTAT00000037743	Factor4	-6.70778	mRNA_FT
TCONS_00118023	Factor4	-6.77262	lncRNA_PBL
ENSBTAT00000072365	Factor4	-6.82338	mRNA_FT
TCONS_00075050	Factor4	-6.92463	lncRNA_PBL
ENSBTAT00000026308	Factor4	-7.10978	mRNA_FT
ENSBTAT00000081091	Factor4	-7.30376	mRNA_FT
ENSBTAT00000024880	Factor4	-7.30376	mRNA_FT
ENSBTAT00000005642	Factor4	-9.93518	mRNA_FT
